# Supplementary material
Source: publisher figshare collection journal article supplement (https://geolsoc.figshare.com/ndownloader/files/31560708)
Supplement: Supplementary file 1 [file 31560708]

## Sheet: Best_U_Pb_ages
290618-02	2sigma	300618-01	2sigma	CWT-1	2sigma	300618-02	2sigma	300618-03	2sigma	300618-04	2sigma	CWT-5	2sigma	CQT-2	2sigma	300618-05	2sigma	300618-06	2sigma	300618-07	2sigma	Merged	2sigma	Ordovician Calapuja and San Gabon Altiplano Peru Reimann et al. (2010) and Perez and Horton (2014)	2sigma	Ordovician (Sandia and Amatura) Eastern Cordillera Bolivia and Peru Reimann et al. (2010)	2sigma	Devonian-Carboniferous (Cabanillas, Lampa, Ambo) Peruvian Eastern Cordillera and Altiplano (Perez and Horton, 2014; Reimann et al., 2010)		Silurian-Carboniferous Bolivian Eastern Cordillera (Leier et al., 2010)	2sigma	Late Jurassic-Early Cretaceous (Huancané and Muni) Eastern Cordillera and Altiplano (Sundell et al., 2018, Perez and Horton, 2014)	2sigma	Late Jurassic-Early Cretaceous (Hualhuani, Labra, Puente) Peru (Sundell et al., 2018)	2sigma	Jurassic-Cretaceous (Western Cordillera, GUA08-02 and GUA08-04) Chile (Wotzlaw et al.,2011)	2sigma	Devonian Western Cordillera Chile (Bahlburg et al., 2009)	2sigma
30.5441	4.29517	35.4525	3.55154	78.0156	3.10182	35.5613	3.68353	37.7582	3.18509	34.211	1.67889	74.2283	0.974195	86.3485	1.80123	26.462	2.11353	26.2019	4.84907	22.132	1.39962	22.132	1.39962	985	70	435	28	283	11	321.404	10.7852	231.623	17.8171	141.37	3.64098	416	21	1211.9	20.188
31.003	4.53881	37.281	4.32849	112.351	6.3708	37.4234	5.21432	39.863	2.9125	36.8572	2.9674	92.0052	0.950058	160.442	2.47201	27.579	2.91729	26.5879	4.85778	23.1124	1.85461	23.1124	1.85461	1251	254	436	31	358	20	339.966	47.4219	240.333	11.1479	152.849	6.63869	492	26	1097.1	41.356
31.0863	4.49236	38.0352	4.8822	128.331	9.22473	38.7427	4.16513	40.5809	2.96112	36.9399	4.31558	92.6098	0.919478	160.504	4.05818	28.8941	4.02651	26.6012	3.9646	23.2834	2.0316	23.2834	2.0316	1688	232	438	36	362	13	401.761	7.78996	241.345	35.3576	214.235	27.165	548	25	462.8	11.956
31.2101	5.54077	38.5188	4.85322	169.619	23.5039	39.3363	4.03337	46.646	4.75023	37.0777	1.85236	140.013	4.51522	268.567	16.8352	30.6397	3.07321	27.2566	4.55717	23.364	3.6733	23.364	3.6733	715	64	449	14	367	14	402.313	23.947	242.048	12.2315	229.366	26.3326	513	27	527.5	13.72
31.2367	5.11249	40.2607	3.18452	260.003	25.432	39.4892	5.35329	57.1198	7.22182	37.3378	2.68446	264.923	2.59567	273.483	19.5467	64.0148	3.39993	27.3541	2.30042	23.8649	1.67361	23.8649	1.67361	874	86	457	26	379	23	416.054	40.8554	244.399	8.80249	236.223	25.69	455	21	976.3	22.148
31.6366	4.9265	41.485	4.56586	269.958	2.85534	41.3484	5.29228	61.7581	5.95552	37.5457	2.95964	273.91	2.68172	296.615	12.4075	76.0472	4.88104	27.5452	3.085	28.2219	3.53431	28.2219	3.53431	1699	68	462	28	385	8	426.376	12.1299	245.145	12.749	238.031	10.4146	511	26	484.3	13.72
31.797	3.01594	42.7715	3.81594	321.988	18.8448	42.347	4.68197	62.946	5.27997	38.4874	2.89982	293.071	6.647	330.519	9.27903	80.7398	3.55943	27.9369	2.04072	52.6893	10.3887	52.6893	10.3887	1184	132	471	26	394	13	443.719	19.3815	251.848	17.8695	239.156	24.41	713	34	472.9	16.464
32.2323	3.33439	48.4033	5.34192	368.519	23.7118	42.4916	6.9012	69.4988	5.50961	39.0582	2.69581	318.5	23.7421	334.861	24.8651	89.636	15.153	27.9577	2.46761	85.9546	5.38243	85.9546	5.38243	1188	140	484	40	394	15	453.046	17.5872	254.624	29.3021	239.518	20.4191	522	24	464.5	15.68
32.798	4.11593	52.4151	6.32271	415.22	8.44474	43.4786	3.34589	71.1759	3.90455	39.3209	5.57265	333.741	8.26133	444.659	26.9833	123.155	7.76871	28.2742	2.86555	88.2813	14.5658	88.2813	14.5658	1106	144	498	26	398	21	454.377	17.2861	255.975	9.22631	240.247	13.0999	274	17	526.6	18.62
32.8538	6.49327	55.1986	8.39038	450.905	16.4618	43.4955	3.26037	71.9525	5.13311	43.2306	2.72536	368.414	9.59665	455.654	12.8458	128.423	3.89856	28.5955	4.41463	106.357	14.0497	106.357	14.0497	389	30	499	31	399	14	459.793	27.2481	256.813	7.77442	245.173	16.3516	718	33	489.3	17.64
33.2711	4.13318	55.3475	6.24759	456.898	8.20421	43.8346	5.97677	72.4964	4.48806	43.9586	3.13647	425.33	6.83262	460.59	29.6941	147.362	19.8943	28.6281	5.34849	125.052	6.81385	125.052	6.81385	1220	88	516	13	400	11	462.145	10.0789	257.398	27.0517	245.225	10.4683	1034	44	1157.5	27.244
33.3277	5.36095	56.0126	6.00373	465.758	24.3537	44.2171	2.45431	75.3861	6.54855	52.813	2.65125	436.423	17.8075	465.786	4.67331	153.747	6.66348	28.6379	2.51292	199.985	21.8095	199.985	21.8095	908	106	517	9	408	14	470.08	18.8594	257.899	11.947	246.997	12.8384	1461	43	482.2	10.976
33.3695	4.60686	57.7597	6.05554	507.23	22.4383	46.9981	3.64542	77.1189	3.98469	55.3375	4.54357	437.022	8.70427	468.118	10.4754	168.467	6.60321	28.8063	2.90722	222.74	22.8185	222.74	22.8185	1137	102	519	20	409	45	471.399	25.1835	258.056	13.2013	247.199	15.073	607	29	533.5	17.64
33.3942	3.4833	64.5167	5.81211	511.137	12.7767	47.3216	6.07885	78.502	4.60561	56.2899	6.19774	439.542	18.1854	474.64	4.85044	235.539	13.2849	28.8417	3.98066	251.093	31.4509	251.093	31.4509	1133	64	520	24	409	10	487.226	21.3987	258.388	23.8301	247.576	18.0287	985	40	518.4	13.132
33.4033	5.67607	67.6522	4.77839	514.932	8.80928	48.9419	4.88728	79.9246	1.91899	56.8186	5.41125	464.242	12.1834	476.727	7.72005	250.008	16.7622	28.9785	4.09625	258.086	26.2709	258.086	26.2709	1182	196	521	26	413	18	488.48	40.3632	265.073	24.2136	248.288	14.1288	1005	44	522.9	15.092
33.4441	4.55741	67.6555	6.44737	515.628	31.8141	50.6895	3.86568	80.3057	12.431	71.015	4.8604	464.285	17.7392	481.679	4.64124	252.115	17.6758	28.982	3.70541	260.489	14.3486	260.489	14.3486	1111	232	521	21	415	14	491.043	19.3851	267.914	9.91345	249.111	18.0786	1072	41	461	12.544
33.4631	5.073	67.7918	4.50438	517.142	23.0582	57.9524	7.1104	86.2328	3.38001	71.3039	4.26881	465.176	7.27038	482.306	5.94823	261.8	10.5845	29.2727	2.19591	267.615	49.6311	267.615	49.6311	1597	190	524	12	417	12	493.313	9.4982	275.324	12.2477	249.371	26.8038	1025	37	1014.9	21.952
33.5669	4.08035	69.5932	6.3955	517.942	12.5416	61.6542	5.79335	89.095	5.93075	72.8058	2.16197	468.607	13.469	484.559	6.90858	262.183	15.7935	29.4351	3.18841	270.344	20.3397	270.344	20.3397	975	50	526	21	418	25	495.485	23.8461	287.17	21.3714	250.317	12.932	1075	38	611.2	17.836
33.7242	4.38996	70.8219	7.15115	523.362	7.03761	62.348	5.2875	105.199	10.6607	73.7076	11.9057	478.502	16.9712	488.967	20.1538	264.534	14.9513	29.4881	1.88035	283.743	19.4512	283.743	19.4512	955	298	530	28	419	15	500.949	18.99	295.13	9.88675	250.664	29.8263	521	26	486.1	15.68
33.9402	4.21978	71.8311	3.94829	540.26	12.6451	65.3243	3.65627	125.509	9.41474	74.3605	5.44313	478.897	11.2616	491.562	13.4414	273.931	21.4321	29.7532	4.03995	284.572	38.9283	284.572	38.9283	1004	198	531	36	420	19	509.074	23.4956	311.299	17.2899	251.433	7.89946	493	25	488.9	17.248
34.246	3.46188	72.1377	6.80455	553.095	24.5935	67.4404	5.857	145.709	5.58363	74.6378	5.56672	484.361	6.53256	498.383	14.0045	282.961	7.62422	29.7537	2.49357	287.312	29.7764	287.312	29.7764	953	82	532	20	422	13	513.142	57.1187	343.853	15.5208	251.897	7.29888	462	23	1266.7	26.656
34.3688	5.73286	73.1405	4.41517	556.573	38.7122	68.6018	6.62121	146.217	10.6225	76.8393	8.27641	513.008	7.19965	501.915	15.8383	283.849	9.80659	29.7893	3.26372	305.199	32.8244	305.199	32.8244	1793	168	538	32	427	37	513.299	32.5642	356.822	30.286	253.201	21.6928	1100	48	480.8	13.72
34.4212	4.49029	73.7589	4.74844	557.228	5.33824	68.9821	5.83444	154.578	11.003	79.8529	6.37628	520.905	8.30689	508.045	15.9264	288.544	32.6716	29.7948	4.68405	308.716	21.6118	308.716	21.6118	944	104	540	31	431	20	517.328	21.2765	370.126	18.3156	253.285	19.6385	1124	41	449	18.62
34.485	5.35942	74.8547	5.42643	563.367	13.3784	69.5658	5.79104	157.748	8.51756	80.9889	4.20215	523.042	34.2628	521.103	15.7188	293.902	54.9929	30.3202	2.36486	315.465	24.733	315.465	24.733	1254	92	540	34	433	17	525.898	16.2616	372.215	15.1648	255.12	11.1122	1100	42	464.9	10.192
34.5762	4.14869	75.4142	3.57618	571.543	24.831	70.5335	6.43876	166.243	7.93267	82.4906	5.14493	534.513	11.1824	523.468	22.2228	311.61	28.1062	30.4867	5.61029	316.521	37.5358	316.521	37.5358	941	96	541	13	434	14	528.249	21.7075	373.147	38.9902	255.179	19.1803	283	17	469.4	11.76
34.6492	4.43771	76.1147	4.24756	579.03	15.1738	74.4951	6.96721	184.562	6.15682	83.3395	4.92397	536.568	11.0178	523.596	16.5958	311.668	29.2849	32.4158	5.59081	322.743	55.8425	322.743	55.8425	1005	212	544	53	435	18	528.263	17.7519	440.39	28.1471	259.655	8.78222	1079	40	480.6	11.76
34.83	4.68613	77.3941	5.24093	580.567	14.1019	77.5421	5.04548	184.755	10.6677	85.4183	5.38831	567.635	7.60706	528.326	6.69579	337.052	13.7078	33.2366	6.40696	325.866	17.16	325.866	17.16	1047	84	546	28	435	26	529.295	23.883	468.964	22.8502	260.787	11.9118	627	30	1211.9	20.972
34.933	4.3524	77.4495	6.86391	584.426	25.0306	78.4358	4.84489	187.854	10.1774	86.1321	4.25528	575.293	5.50379	528.606	19.59	350.702	18.6361	34.1068	4.50729	330.064	17.5203	330.064	17.5203	1123	198	548	28	436	22	531.416	10.202	473.592	20.5992	264.809	10.91	374	21	1172.5	21.56
35.0961	4.4452	77.674	6.36358	614.171	16.403	79.5872	6.43303	208.728	10.8319	87.2974	5.6104	577.464	11.3785	538.643	21.497	361.006	23.7894	39.3908	5.76932	350.047	36.3182	350.047	36.3182	904	72	550	22	437	11	533.541	25.6029	473.724	20.8279	265.311	18.7063	525	26	460.4	9.212
35.1294	3.93556	79.3556	2.67153	615.109	7.04011	79.894	6.22278	226.778	16.3529	88.7623	11.6464	580.746	7.33069	549.059	31.5797	363.308	29.1057	81.0318	7.7011	354.787	24.7867	354.787	24.7867	1131	246	551	19	441	16	534.247	13.1253	476.403	22.9707	265.548	26.321	1039	41	470	10.976
35.1506	3.23376	79.9498	5.91824	626.915	15.8907	80.0627	6.83167	230.18	10.5178	89.6021	5.51614	584.205	12.399	566.514	12.6906	384.746	16.4085	221.334	25.4478	357.709	28.966	357.709	28.966	906	116	552	18	442	16	535.085	18.3826	477.426	24.4843	270.031	26.6824	476	24	471.7	11.564
35.2297	3.30458	80.3844	14.7727	628.735	25.3996	82.4852	5.31162	231.468	18.1778	91.5072	4.34847	597.022	42.7659	572.58	27.8328	389.459	20.9985	246.336	8.48294	370.073	24.6231	370.073	24.6231	1018	170	555	20	444	24	538.713	18.9156	483.206	47.4247	273.662	24.1057	668	30	461.5	12.348
35.3245	6.25072	80.5266	5.65228	631.025	33.0619	83.4034	5.16598	232.851	16.8756	94.1113	6.09887	614.391	32.114	622.515	31.6878	392.007	14.2443	256.577	15.7014	376.941	37.3015	376.941	37.3015	1441	78	559	37	447	19	547.964	16.285	491.948	20.1441	275.528	15.6813	474	23	477.9	14.7
35.3436	5.74221	80.592	15.6293	639.933	18.5196	84.4926	6.34856	237.492	16.7548	94.5033	2.82653	621.261	9.35778	626.943	19.476	392.08	25.5287	263.179	15.1456	377.857	30.9484	377.857	30.9484	458	44	561	25	451	29	552.278	37.2616	492.547	23.2127	281.954	14.8929	1895	39	480.5	11.76
35.3572	3.53169	80.624	15.3375	655.057	11.7101	85.5781	8.3417	237.828	12.3752	95.1983	3.32316	641.259	12.8183	692.805	11.2983	396.808	71.1315	272.13	13.4905	381.303	22.2036	381.303	22.2036	1252	206	563	17	453	14	558.56	44.516	498.994	26.1433	286.082	9.24747	2068	30	1094.5	22.344
35.5263	3.31665	80.7078	4.05529	678.429	92.7303	85.8435	6.86062	241.92	21.8858	104.389	5.56509	643.69	18.0104	708.044	18.373	407.263	22.0969	284.228	25.3828	383.313	21.4535	383.313	21.4535	1228	122	565	37	454	23	567.05	31.8097	501.2	22.3285	297.369	38.5936	730	34	1229.5	32.928
35.6206	6.01911	82.0937	11.6231	679.381	24.245	85.8584	4.51479	244.088	9.40802	104.599	8.04807	649.652	9.39349	814.788	77	411.007	19.0782	293.119	50.5499	385.718	36.0303	385.718	36.0303	1007	332	565	34	457	24	571.554	48.0224	508.54	25.6439	326.864	21.9156	304	15	512.9	10.78
35.716	2.69764	82.9344	4.68063	703.929	23.2067	86.3017	7.23763	246.419	7.15631	144.928	5.74212	669.334	29.1178	831.753	8.73972	416.603	26.6299	294.547	22.5847	392.761	22.4473	392.761	22.4473	1195	186	566	24	458	29	578.76	11.6244	510.071	22.3233	330.843	13.3937	529	27	491.5	10.388
35.719	5.23914	83.0863	5.32844	767.591	22.8675	86.7467	14.1385	248.466	12.1112	146.138	5.19957	683.225	12.1875	901.552	27.9328	422.272	31.044	338.79	44.4736	395.858	27.3706	395.858	27.3706	964	242	568	64	459	25	585.388	11.3039	511.826	34.72	346.718	26.8648	464	23	471.6	9.8
35.7321	4.83742	83.8644	7.11406	901.587	16.4911	89.4583	8.97316	248.802	15.762	147.771	14.6474	746.458	38.9085	1024.03	27.1825	422.901	31.7339	347.02	42.0005	395.95	22.9652	395.95	22.9652	1112	124	572	26	462	14	599.981	16.156	511.962	21.4876	359.297	30.4853	1177	34	1853.4	17.836
35.7914	4.26374	84.0018	11.9979	1016.2	127.936	91.3076	5.40773	248.926	16.0634	147.81	10.6294	1001.4	70.2957	1044.39	77.8075	427.896	30.1213	361.486	53.3216	402.805	68.8623	402.805	68.8623	1180	68	573	15	465	39	606.777	32.8927	513.061	20.6654	398.576	17.06	126	7	469.5	9.8
35.8865	4.59556	85.0971	8.81393	1046.31	93.2238	94.8146	5.51315	249.528	16.7168	150.508	11.094	1028.21	68.7705	1045.04	55.6831	428.029	37.3947	371.506	23.8279	404.974	39.3046	404.974	39.3046	1018	114	577	33	466	15	610.885	15.3868	513.071	22.2725	402.09	14.3417	520	29	498.4	16.072
36.0474	6.3389	85.6381	4.87788	1059.31	83.3653	94.881	5.236	249.699	12.9813	151.632	9.67642	1035.65	73.5985	1046.12	73.016	428.294	17.9259	376.544	11.7833	409.424	48.3309	409.424	48.3309	1147	224	581	26	469	16	614.219	64.2113	514.534	26.0887	405.931	23.7461	628	29	1181.5	29.4
36.0806	2.97582	85.6833	8.54588	1095.21	128.632	96.3344	7.39005	250.96	4.72408	154.826	19.6569	1074.73	41.165	1066.09	63.9995	428.773	18.5979	377.426	33.6239	410.344	51.7915	410.344	51.7915	1259	176	584	15	470	14	618.815	15.1051	516.472	24.4933	428.969	30.6727	490	24	495.6	14.896
36.0857	7.08583	85.9369	5.97797	1130.32	49.8813	97.3492	9.8139	253.033	8.31133	156.348	4.27537	1103.62	120.456	1090.75	60.5454	433.669	22.2947	378.428	56.9388	412.486	45.4026	412.486	45.4026	1202	126	585	30	476	26	619.139	20.8979	516.581	20.1399	429.659	33.4818	596	29	471.7	12.936
36.093	5.82087	88.9354	6.87172	1155	87.3735	143.264	9.02476	256.18	13.9444	178.652	13.2587	1106.74	53.6078	1096.81	98.1804	435.191	34.9518	423.542	49.4417	416.57	31.3457	416.57	31.3457	953	74	587	34	477	29	627.971	25.4899	516.595	30.561	440.694	28.9661	1356	42	515.7	17.248
36.1387	3.64729	93.0851	7.87998	1162.64	129.414	145.185	8.42468	256.527	15.9684	186.615	13.1342	1118.44	59.6892	1132.59	69.9583	435.43	14.0302	427.411	32.1231	420.354	37.3589	420.354	37.3589	1132	94	590	19	477	23	639.111	28.9623	518.006	21.7812	443.515	31.8723	691	32	461.8	11.76
36.1521	5.56781	93.7951	6.39588	1166.28	73.5689	149.745	9.73626	256.965	10.4165	193.841	13.5317	1147.21	106.13	1134.92	45.8203	436.131	24.4911	429.006	54.3495	420.387	24.101	420.387	24.101	1785	124	597	23	482	33	640.86	17.691	521.028	17.8138	445.292	32.1449	948	40	466.8	12.936
36.2502	4.38574	96.053	8.10239	1174.88	116.403	150.832	7.60048	257.066	8.07589	199.955	4.64208	1162.84	112.64	1141.61	62.8421	437.088	28.6362	430.758	22.0944	423.481	52.0993	423.481	52.0993	1804	324	599	40	487	19	647.322	12.3177	525.108	43.904	449.93	30.5117	255	14	466.8	12.936
36.3603	3.06541	97.2811	6.87549	1209.15	90.5871	151.472	9.20242	257.208	44.3338	213.019	19.5441	1235.13	53.0242	1164.21	71.7468	438.414	29.0653	431.775	14.4962	428.295	66.2343	428.295	66.2343	1084	240	602	23	487	15	650.092	76.3098	526.149	22.3746	452.067	46.3539	564	25	470.6	12.936
36.3792	3.47239	110.745	16.5289	1216.52	118.342	152.399	12.9652	257.709	10.1099	231.179	11.4851	1330.83	80.1456	1174.57	66.1344	440.224	28.6263	435.584	54.889	430.537	21.7065	430.537	21.7065	1138	260	603	35	493	22	654.457	12.4467	527.011	24.4469	453.903	58.7942	530	26	631.4	17.052
36.4278	5.76176	113.839	9.98307	1248.5	100.969	157.411	13.003	258.331	14.3831	235.814	9.8181	1339.3	138.973	1212.09	95.534	440.428	26.1958	436.14	28.0419	433.798	30.144	433.798	30.144	1157	224	603	35	496	21	659.321	18.0497	527.389	30.3386	455.121	39.9212	1042	41	475	14.896
36.5298	5.76147	115.762	16.6687	1280.41	47.4006	159.903	16.0344	258.338	19.7148	237.577	9.68638	1354.98	133.629	1249.71	61.865	441.093	15.307	436.312	16.9844	434.077	21.8735	434.077	21.8735	1666	140	605	26	505	21	671.835	29.7314	529.347	38.6405	456.909	28.5117	646	30	476.4	12.152
36.5742	6.14281	116.775	6.46874	1316.13	122.19	160.963	13.7915	259.627	14.9422	238.901	5.83413	1362.77	59.0819	1257.79	52.6094	441.868	38.3273	442.41	19.061	435.875	26.9563	435.875	26.9563	1203	120	605	29	515	17	681.875	37.7879	529.762	35.4038	459.935	28.1604	522	26	466.4	11.564
36.7554	6.97787	127.246	24.7089	1419.46	138.82	161.842	13.7263	260.331	12.2603	242.893	6.90591	1372.64	60.1577	1354.6	47.1065	442.833	24.7265	445.261	37.5825	437.071	20.3275	437.071	20.3275	991	154	608	16	522	21	687.003	24.6329	530.875	27.3788	467.271	65.1679	318	17	463.6	14.308
36.8714	6.28177	136.856	8.61516	1441.47	75.1081	174.235	20.081	262.963	15.0234	246.44	6.98414	1384.6	80.3123	1355.79	80.8468	443.391	17.1841	448.068	44.4525	439.638	31.0345	439.638	31.0345	1824	168	609	31	522	14	739.538	18.5853	533.842	20.8281	470.073	29.8955	1057	50	460.2	11.956
36.917	5.50159	140.42	10.6177	1512.5	142.768	176.358	13.4196	267.487	11.9737	248.378	10.707	1447.33	45.7992	1370.69	55.9133	443.993	23.597	449.152	49.2718	439.989	22.1489	439.989	22.1489	1164	132	609	24	526	21	791.273	47.3592	536.308	23.0051	473.405	27.4816	1145	39	468.2	13.328
36.9714	5.53296	144.188	9.28781	1601.47	79.1145	198.794	17.4165	267.994	10.8214	252.214	19.4263	1483.96	78.4809	1409.78	44.8644	444.588	31.5612	449.789	13.9003	444.406	68.9062	444.406	68.9062	1130	120	609	44	527	21	795.124	60.4423	539.272	48.8153	474.72	33.048	517	26	475.4	12.348
36.9751	4.30155	146.864	9.19715	1621.43	58.4982	214.565	28.5413	268.338	10.0522	252.271	17.0309	1501.35	59.7527	1513.2	59.2906	444.67	30.2446	450.766	24.3088	447.416	21.4548	447.416	21.4548	1162	148	610	16	535	23	818.415	26.286	540.33	20.7642	477.292	13.6492	284	16	1844.6	18.228
37.0559	5.66315	146.882	10.0109	1667.13	63.2749	216.431	19.3822	271.744	12.0687	257.717	8.49529	1518.61	98.1078	1787.67	47.8026	445.293	26.8577	451.282	35.2986	449.008	34.1889	449.008	34.1889	1117	114	611	60	538	16	875.746	33.5736	540.345	30.0578	478.129	17.3136	287	16	1072.4	48.02
37.057	6.34315	151.746	6.11696	1769.37	121.308	222.481	33.4439	272.3	6.78145	257.982	9.02678	1525.75	61.4573	1807.18	57.0845	445.537	16.9101	452.836	23.3099	449.803	23.535	449.803	23.535	1226	194	612	25	539	23	892.57	43.5106	540.993	26.5731	480.459	32.3756	1037	36	478	11.956
37.2236	2.6369	155.815	11.069	1779.8	62.4008	226.196	28.2254	272.357	6.9221	258.707	13.9406	1529.23	53.5287	1843.73	57.2376	446.344	31.4949	455.218	20.8806	449.987	36.6785	449.987	36.6785	540	54	615	23	547	24	901.889	16.8329	543.866	17.0424	481.573	32.9605	652	31	477.3	12.348
37.2499	6.55565	157.271	11.8113	1787.73	115.993	236.367	42.9879	280.843	7.18353	263.213	14.9922	1566.99	507.009	1878.77	55.1483	447.132	19.4354	459.057	29.7302	451.977	44.5986	451.977	44.5986	1266	264	618	28	550	20	963.935	106.108	548.696	46.0829	481.998	19.5018	1029	40	474.5	10.388
37.3027	4.80346	160.622	8.71362	1796.95	68.4514	241.217	13.7031	281.218	13.7659	264.289	9.71883	1807.79	53.0849	1880.96	48.2959	447.706	30.3332	459.508	38.961	453.418	26.5169	453.418	26.5169	1067	244	620	57	558	18	1006.98	46.4545	548.793	35.8844	483.335	21.5436	681	34	475.3	10.78
37.6401	3.56527	183.283	16.5358	1800.34	86.6176	241.942	24.6167	281.27	12.8817	270.23	13.4499	1847.47	104.612	1955.26	38.6393	448.029	37.8853	460.693	70.2863	453.671	23.3716	453.671	23.3716	961	140	621	26	563	30	1022.53	102.878	549.507	24.8216	487.547	38.0319	1613	46	485.5	16.464
37.9572	4.362	207.712	20.1073	1811.59	54.1671	242.34	19.8449	281.427	14.1928	271.22	9.65233	1892.74	49.3238	1997.4	40.1621	448.238	17.2807	462.128	31.4521	454.889	26.2285	454.889	26.2285	982	140	621	36	564	18	1027.73	101.215	550.169	22.372	490.872	38.4871	632	35	1408.9	26.46
38.1159	2.28266	213.533	32.4314	1827.72	66.4228	243.94	17.5569	284.39	8.65585	271.539	30.0584	1923.31	128.174	2052.77	31.4886	450.012	18.3065	462.644	28.5304	455.637	54.588	455.637	54.588	972	164	624	44	566	24	1038.66	93.1192	550.435	27.317	492.147	22.1733	939	44	481.1	13.328
38.7639	3.88092	215.515	11.8974	1880.56	112.216	245.472	17.353	285.89	11.9069	273.03	18.9901	2052.78	63.2435	2709.69	43.5518	450.155	23.6094	463.83	20.6897	457.127	29.6283	457.127	29.6283	1126	116	627	34	568	39	1047.89	97.6528	550.967	28.701	496.051	29.5113	364	19	496.7	13.72
38.8348	3.01207	216.689	18.7038	1944.19	96.6119	246.63	22.5146	286.573	30.1592	275.824	17.4524	2106.04	38.9813	2755.88	39.7608	450.871	44.5674	464.927	30.0562	457.687	53.0891	457.687	53.0891	1122	94	629	44	569	18	1051.75	79.4598	551.696	26.5701	496.675	48.8168	618	30	503.5	12.152
39.0803	4.42617	228.421	15.9199	1960.96	93.168	248.244	25.4275	297.36	16.9534	276.357	36.5189	2486.7	38.1018			451.003	17.5393	467.7	33.1579	458.232	32.2098	458.232	32.2098	1006	160	630	23	572	28	1052.02	111.777	552.214	32.7473	497.048	24.9296	941	28	507.1	15.484
39.4577	5.61108	240.571	20.7412	2015.79	102.582	249.477	14.8404	318.218	15.2111	279.901	28.3976	2624.33	67.5273			453.449	54.6761	468.71	29.1163	458.728	25.3272	458.728	25.3272	1771	84	631	45	576	23	1058.4	135.936	552.555	26.3702	500.449	27.3823	457	23	491.1	14.7
39.4953	5.02712	243.852	33.1176	2260.02	50.0626	250.644	12.8276	320.334	14.6899	297.342	15.6384	2723.36	46.7913			454.328	36.8397	469.439	75.7202	458.821	67.3204	458.821	67.3204	1027	164	632	31	577	20	1060.39	69.6567	552.867	20.3793	501.194	19.7213	512	25	495	12.544
39.6093	4.76273	245.21	7.27927	2390.57	305.904	250.855	13.9606	325.299	6.94846	298.692	15.5421	3428.64	49.7385			455.039	30.1075	469.574	32.1428	459.838	48.4626	459.838	48.4626	1151	174	632	16	578	24	1083.85	125.404	553.717	41.1807	501.794	55.3971	540	32	576.4	16.856
40.1607	4.1694	246.58	16.8511	3140.35	121.11	251.204	18.9052	335.15	10.4932	303.557	12.0824					455.484	68.2674	469.587	18.7119	460.557	31.0567	460.557	31.0567	1269	204	633	18	580	18	1098.35	158.7	554.569	27.9986	502.927	21.0817	646	30	442.4	10.584
40.4713	6.60704	252.268	19.1291			254.546	24.7841	338.122	11.4743	327.301	39.4417					455.739	25.4589	470.324	23.1118	460.599	85.3138	460.599	85.3138	1048	178	636	36	585	23	1125.16	126.17	556.076	18.6468	505.837	22.3214	273	14	468.1	11.368
40.4912	4.88317	253.445	16.3414			254.583	13.0773	338.586	21.889	330.88	12.0416					455.941	17.0461	472.583	40.3479	462.071	38.9505	462.071	38.9505	1170	160	636	38	586	16	1131.11	75.3862	556.409	26.2223	507.096	25.209	577	26	496.8	14.7
42.8816	5.61887	254.139	28.4657			256.129	17.507	346.913	24.5704	347.879	17.4941					457.89	46.066	472.803	29.6711	463.721	25.097	463.721	25.097	986	162	636	40	592	26	1161.42	58.0423	558.398	24.0191	509.553	25.2551	524	37	470	16.268
46.0771	7.04789	257.403	40.6712			261.628	17.9866	351.422	13.6982	361.681	19.6857					458.19	29.9605	472.828	16.7273	465.939	23.0651	465.939	23.0651	933	80	638	25	597	20	1162.74	163.043	558.704	27.0141	510.385	23.014	260	15	472.8	12.544
49.402	7.03004	260.215	22.2418			262.772	17.4455	356.479	5.37801	383.907	15.6904					458.322	25.2764	472.893	17.3029	466.136	33.1456	466.136	33.1456	1113	126	638	36	606	17	1167.83	276.476	560.723	35.949	511.765	27.2055	675	33	534.6	14.896
51.3095	5.24706	265.168	13.2337			262.916	22.7375	360.623	23.4342	387.919	34.4713					458.534	40.075	474.013	58.8026	466.141	25.4441	466.141	25.4441	1381	156	638	25	608	28	1178.24	95.8597	563.325	28.654	514.253	23.9884	818	35	457.2	12.152
54.5049	7.97097	266.281	11.6578			264.299	30.7022	407.291	21.0845	393.72	20.5858					459.133	16.7102	475.287	17.0554	466.922	26.5088	466.922	26.5088	1639	260	642	35	618	29	1245.5	89.811	564.316	24.6438	516.145	65.4848	3101	30	490.9	12.936
68.1104	4.59061	266.796	16.4239			264.355	14.7812	417.882	31.2844	396.937	44.04					461.479	33.2109	475.983	44.1609	467.253	41.5362	467.253	41.5362	1448	250	643	29	621	26	1325.5	485.323	565.674	56.3144	516.561	14.7531	2168	27	491	14.896
71.25	5.69252	272.47	48.9212			269.169	27.4052	431.386	13.9358	411.478	28.1847					461.732	26.8737	476.37	27.5425	468.429	28.8332	468.429	28.8332	1015	282	644	30	626	18	1444.27	109.767	566.487	33.6404	517.396	38.2127			659.4	17.444
72.4182	10.6233	277.083	39.1683			269.86	19.1717	445.818	16.1749	415.801	32.1953					463.175	30.9553	476.522	59.5671	469.091	29.4602	469.091	29.4602	1023	256	644	25	632	30	1470.48	83.196	567.118	25.9749	518.616	22.5004			490.4	13.524
73.1754	12.7685	283.695	9.85948			272.66	23.0837	446.039	26.6889	421.393	23.5483					464.604	21.4826	476.701	57.6132	469.752	28.5915	469.752	28.5915	1041	270	645	19	635	22	1568.14	79.6606	567.259	21.9278	519.556	15.3588			502.5	16.66
73.9194	2.95246	283.817	14.1822			274.439	26.2238	451.843	29.9562	436.528	55.9752					466.001	22.221	477.355	47.0302	472.169	29.7736	472.169	29.7736	1008	246	646	53	651	18	1666.8	1090.22	568.278	64.6557	521.11	24.1375			475.4	12.74
75.8627	7.2463	284.952	52.2853			274.582	18.2942	454.052	18.3109	440.408	35.9487					467.966	12.7677	477.426	28.634	472.451	37.5611	472.451	37.5611	917	104	646	39	652	31	1678.05	120.145	569.361	25.8117	523.579	24.0366			1388.4	21.756
90.6912	4.11878	286.369	11.2129			275.759	21.2207	454.597	26.9346	442.089	58.6629					468.651	23.5336	478.076	45.1253	472.551	61.4503	472.551	61.4503	1035	242	650	23	653	42	1778.28	48.2664	570.195	21.899	524.643	36.8975			1158.3	28.42
102.023	14.8986	287.731	34.9597			291.343	15.9505	456.047	47.5975	442.702	73.3126					470.775	26.1612	479.174	16.5336	476.674	24.3667	476.674	24.3667	1025	238	653	41	653	18	1891.48	61.2005	570.929	21.0599	525.839	21.1872			1330.3	21.952
117.163	14.0714	304.37	24.6221			292.507	15.1373	460.992	37.4122	448.364	10.9196					472.094	37.1644	479.3	20.1881	477.104	38.8541	477.104	38.8541	1110	96	654	16	655	25	1913.18	86.1731	571.414	50.6827	528.75	56.9946			478.9	16.072
127.391	17.8614	304.755	20.6567			295.082	24.8616	464.382	85.593	451.751	15.3197					472.52	15.6374	479.946	50.2173	477.978	26.2979	477.978	26.2979	950	170	656	15	656	22	1988.91	93.2393	572.178	24.739	530.607	17.7999			1067.3	27.44
128.751	22.954	309.82	48.8928			302.115	29.6847	467.163	36.8468	462.239	12.752					472.627	14.1285	480.216	26.9797	478.468	41.5427	478.468	41.5427	1100	78	657	25	659	36	2029.32	45.3855	572.832	21.0701	531.631	16.4824			510.8	17.052
128.814	22.4289	313.417	12.5739			306.648	19.4875	472.974	15.6097	463.286	12.8837					473.071	19.4083	480.221	55.0759	479.899	24.6608	479.899	24.6608	1093	190	658	22	666	26	2065.21	81.1193	575.309	28.4374	533.944	44.7364			640.2	20.972
147.58	25.5133	317.124	22.0061			316.108	40.043	473.999	21.1438	470.813	13.408					473.985	76.3502	481.045	24.8552	480.776	51.3781	480.776	51.3781	933	168	659	43	668	14	2119.11	66.5987	577.55	19.4424	537.56	22.4065			1093.3	39.004
151.475	16.5533	326.484	50.7604			331.903	22.4348	476.177	34.9979	474.196	23.0527					474.759	39.3695	481.057	30.1613	480.801	24.7256	480.801	24.7256	938	168	659	21	673	24	2491.72	123.75	578.355	35.1576	538.675	27.0217			481.6	17.052
155.468	28.352	340.106	19.8324			338.374	20.9436	481.995	18.0285	474.205	28.7976					474.78	38.4633	481.435	36.7422	480.911	43.8232	480.911	43.8232	1058	116	666	23	679	32	2649.16	79.6533	578.875	38.4559	543.177	21.8672			507.8	13.72
162.346	15.2291	350.779	64.6918			356.522	30.1851	483.7	14.329	481.666	53.2415					476.752	46.8539	482.239	50.144	484.124	45.6253	484.124	45.6253	1114	104	666	37	679	17	2674.54	57.2694	578.963	23.0239	543.557	20.3368			1087.7	29.204
165.382	22.0064	362.01	48.8118			359.36	19.1579	484.877	36.6969	483.409	30.6398					478.566	59.1422	483.611	19.2806	484.986	43.0804	484.986	43.0804	982	114	666	34	683	28	2864	53.6823	579.497	31.3132	545.243	60.8241			622.9	13.328
170.14	20.296	364.042	44.9747			359.833	29.3952	486.252	15.1496	483.697	35.6438					478.911	44.3984	483.811	23.2141	486.203	48.3197	486.203	48.3197	997	140	670	37	686	18	324.55	14.4331	580.271	23.3628	545.455	45.4306			2061	16.856
170.243	29.219	366.241	37.5784			375.359	31.7611	489.483	18.5843	484.809	27.5386					480.944	21.6901	484.62	52.5266	486.5	30.9932	486.5	30.9932	1089	152	673	38	689	36	341.113	33.5569	580.809	25.501	547.366	24.5459			476.3	9.604
170.256	25.3187	368.945	38.9905			390.482	33.4061	489.635	21.1137	484.995	40.5819					481.1	30.8661	485.559	27.4736	488.921	41.755	488.921	41.755	1123	144	674	38	690	35	341.324	8.37763	581.242	23.1718	548.359	30.6094			1234.9	71.54
185.869	32.1989	378.62	31.2611			401.743	42.993	491.751	35.6614	485.565	57.7117					482.153	35.6176	486.618	46.899	489.194	58.1859	489.194	58.1859	1099	104	675	32	709	41	376.536	67.5181	582.557	31.464	548.929	28.0381			477.7	17.052
196.212	18.6501	396.941	71.9995			420.508	27.975	499.933	14.6466	486.33	30.2076					482.638	30.8443	487.598	30.7615	489.299	26.7519	489.299	26.7519	1549	220	679	46	729	29	411.159	16.2515	582.973	19.3004	549.744	20.3336			551.3	14.7
198.202	26.869	401.016	19.6981			424.061	28.6446	505.006	24.3737	487.738	11.5259					483.827	42.8174	487.711	42.9083	489.985	43.1215	489.985	43.1215	868	236	680	42	736	21	420.064	78.895	585.231	28.0337	552.061	27.6494			493.2	16.66
200.31	19.0672	414.943	41.8786			428.189	40.1794	506.668	29.0283	488.508	19.8857					485.147	14.5114	487.876	35.6381	490.096	33.4629	490.096	33.4629	1817	110	683	21	742	29	422.97	35.4535	585.482	31.6071	552.078	24.1494			1032.7	20.776
205.448	21.7675	416.152	13.8237			428.527	36.2401	509.928	9.77793	489.885	39.7966					486.529	27.0052	487.902	37.5508	491.231	73.1331	491.231	73.1331	1760	84	690	66	755	27	465.031	16.6002	586.911	25.3618	552.961	20.5589			1059.6	22.148
208.216	10.8994	418.264	49.1148			436.724	45.7023	510.484	19.9538	491.701	17.0397					488.004	56.4947	487.962	19.9191	494.953	35.2203	494.953	35.2203	1075	146	693	41	820	23	466.708	28.9038	586.999	32.197	552.977	15.1649			1043.1	22.736
211.538	27.4935	429.248	20.6564			439.889	31.9581	511.815	21.6952	495.997	37.3875					488.24	58.0969	490.308	30.842	495.015	52.911	495.015	52.911	947	32	710	43	821	33	467.878	20.7599	587.663	33.2611	553.068	52.0126			502.9	14.112
222.88	18.4705	432.393	17.1704			446.329	46.5152	515.109	17.7973	498.983	24.0197					488.3	35.6682	490.595	56.7725	497.654	41.1357	497.654	41.1357	783	52	719	37	826	21	472.271	13.8438	588.49	31.8501	553.551	38.3332			1336.4	25.48
238.052	32.3362	433	41.9043			457.823	22.5313	517.769	38.3127	501.098	28.7321					489.765	25.9499	491.659	41.1491	497.772	31.0079	497.772	31.0079	999	80	730	46	826	34	474.664	9.42676	588.81	27.4686	554.269	35.5061			496.3	14.308
240.188	13.5905	434.808	41.2079			466.295	54.9414	518.893	32.2724	503.677	23.9479					491.067	52.6898	492.112	39.862	499.213	40.9903	499.213	40.9903	611	34	746	27	832	43	474.81	18.5845	588.815	32.1393	556.074	26.6499			485.9	11.564
240.503	28.2302	437.012	78.4363			466.467	56.9984	521.998	40.6649	507.017	23.1338					491.446	26.9747	493.296	37.9922	499.406	25.2537	499.406	25.2537	1167	88	748	41	833	53	476.286	9.18234	589.767	52.4499	556.255	28.2093			485.1	14.504
244.188	19.3563	440.025	62.9439			473.794	26.5006	523.905	24.635	512.047	50.2493					492.019	42.3708	494.239	39.9253	500.031	88.8008	500.031	88.8008	1065	104	752	44	834	23	477.492	31.3882	590.814	23.4033	556.423	62.8802			505.2	14.112
244.538	17.1687	445.005	15.6895			474.744	25.1071	524.407	40.605	513.455	57.8499					492.125	29.339	494.249	20.6614	502.848	24.3308	502.848	24.3308	1081	120	752	46	842	21	477.794	19.9865	593.205	17.6285	558.188	19.8986			498.1	12.348
245.738	23.3549	449.038	80.1371			475.999	39.3579	525.57	42.58	518.729	26.0503					494.291	78.2677	494.531	31.2851	502.913	31.0326	502.913	31.0326	1151	88	754	26	852	56	478.897	47.7236	593.688	27.4204	559.697	23.564			1384.2	17.444
246.263	16.6728	454.198	42.9762			483.322	63.7185	527.029	34.1036	520.305	26.497					494.967	22.3749	495.083	62.9103	504.061	93.4871	504.061	93.4871	1042	68	757	43	855	24	480.434	23.7966	594.944	26.4054	560.595	16.7139			435.1	31.556
248.119	11.9424	456.522	76.322			483.83	54.0884	530.008	36.4802	521.334	41.2859					495.527	61.7845	495.203	16.2576	504.365	54.4015	504.365	54.4015	1114	86	766	57	855	36	487.116	9.38335	596.822	23.3937	561.133	24.3895			1266	39.004
255.035	47.2034	456.53	30.0134			486.817	76.3406	530.526	27.039	523.017	30.5423					496.76	45.4386	495.708	61.6454	505	26.8404	505	26.8404	1228	86	775	17	857	24	490.849	13.8007	597.1	37.6903	563.377	47.064			454.5	33.516
265.923	26.8659	459.73	12.2541			491.671	24.3723	531.591	27.2128	524.07	14.8076					497.309	46.8109	498.121	71.668	505.078	24.9786	505.078	24.9786	1087	186	783	30	869	21	491.223	9.45949	598.256	21.1198	564.061	48.2776			1152.8	30.38
266.616	29.501	460.1	19.9444			492.121	75.3402	533.307	30.0807	525.107	18.8584					498.513	34.0494	498.307	38.6721	506.457	89.0899	506.457	89.0899	1228	106	789	36	922	34	493.306	32.1035	598.754	23.8216	564.243	32.0336			992.9	30.772
268.279	15.3745	463.937	63.9309			493.365	31.427	533.758	37.0527	525.585	25.5861					500.51	17.8753	498.742	55.3606	507.196	45.9686	507.196	45.9686	459.4	11	793	50	923	30	497.455	19.8201	604.678	43.4472	565.231	59.7306			1093.8	25.48
305.997	42.4609	466.184	31.5857			494.455	38.6298	534.599	30.7637	526.19	44.1531					501.334	87.3159	499.427	59.0335	510.617	50.4369	510.617	50.4369	471.7	11.2	793	76	930	63	498.109	20.7088	610.701	28.6564	567.131	40.325			1049.6	41.944
318.997	17.665	466.298	18.334			498.092	25.0908	542.129	33.5201	529.949	30.9512					502.556	45.1447	500.879	16.4018	512.463	25.5078	512.463	25.5078	479.1	13.2	804	56	941	40	503.973	25.5962	612.458	21.0508	568.336	46.9338			459.4	33.908
354.415	50.028	466.42	37.3353			500.887	33.3386	543.583	37.8387	532.641	25.9894					505.73	25.736	501.159	21.2545	512.655	28.6701	512.655	28.6701	863	25.2	820	41	946	30	505.121	32.0654	613.461	25.5949	569.591	19.0511			1370.5	19.012
359.559	40.9714	471.211	41.1511			503.099	45.5351	543.952	22.6796	533.739	51.3294					506.732	28.295	502.301	27.4347	513.302	23.8019	513.302	23.8019	868.9	29.4	821	54	948	47	507.279	18.4401	614.517	26.6102	570.653	30.1667			1154.1	28.616
366.936	48.9316	474.432	60.5716			508.229	37.6891	545.399	17.346	534.534	24.4919					507.698	14.2533	503.483	27.7485	514.762	28.0986	514.762	28.0986	966.9	40.4	823	19	948	24	507.772	25.1957	620.704	37.1128	571.381	21.6933			468.8	27.832
368.287	66.6099	474.681	58.1571			509.403	38.5078	545.971	40.2834	535.003	75.2634					507.894	15.17	504.284	33.204	514.808	34.9984	514.808	34.9984	1002.1	234.6	824	41	969	66	512.115	13.0952	624.189	44.843	571.973	30.7641			1003.8	59.192
377.239	17.771	478.217	43.0123			510.762	30.1704	546.261	25.6196	540.142	26.7098					510.017	35.6724	504.355	32.5206	514.851	32.7065	514.851	32.7065	1002.4	56.2	859	82	970	28	516.025	11.6056	624.604	29.8915	575.644	47.489			452.5	27.44
381.596	33.4312	479.442	28.4883			511.994	37.4209	546.508	31.4387	540.526	37.0164					510.08	23.3815	504.989	47.0926	515.033	44.1143	515.033	44.1143	1014.2	16	864	46	971	42	522.441	43.2581	627.709	21.1507	575.708	26.0171			442.9	26.46
383.794	35.8807	481.09	30.9382			513.387	44.1299	547.149	11.7809	541.922	51.3252					510.161	20.2774	506.407	34.1958	515.69	48.2997	515.69	48.2997	1015.2	33.4	881	37	991	64	523.193	10.0505	629.098	36.8314	575.819	40.9467			453.9	28.616
411.022	40.5119	481.409	53.9136			515.502	50.0533	549.553	20.56	542.019	21.3876					512.756	26.1502	507.744	18.8323	517.469	26.6028	517.469	26.6028	1022.1	13.6	950	48	997	37	523.744	26.3589	629.164	28.7352	576.644	24.2136			1159	29.4
419.007	33.5059	484.203	28.4339			516.065	44.6076	560.451	27.2352	542.571	19.4826					513.048	45.2496	507.99	39.0367	518.276	42.0521	518.276	42.0521	1026.8	24.2	989	36	1005	36	524.878	27.2203	637.069	40.9829	576.673	22.4261			1387.5	15.484
427.595	43.2765	486.751	46.6856			519.912	25.5737	568.328	17.4026	545.027	15.4895					513.788	23.6242	512.606	24.42	520.149	25.04	520.149	25.04	1030.6	48.8	997	72	1026	70	526.75	10.1161	653.508	53.7282	578.181	38.4156			1065.4	25.872
428.981	25.113	488.748	17.482			520.842	36.3218	569.803	26.5171	545.409	41.4299					513.961	31.3619	513.144	39.0218	521.49	46.7544	521.49	46.7544	1033.3	23	1026	78	1037	102	544.12	25.0459	656.491	31.9052	578.507	22.3113			1161.8	21.952
464.578	18.7068	489.961	18.5779			526.93	32.3539	574.836	77.4427	547.665	72.2762					514.821	18.4496	514	52.2373	521.637	30.0557	521.637	30.0557	1034.5	33.2	1034	33	1048	65	566.824	32.1231	667.219	28.3711	578.581	21.2141			1104.6	20.58
464.879	70.4171	491.274	35.5049			528.285	56.9753	575.002	34.9011	548.442	26.3634					516.392	18.7175	515.839	66.7971	525.095	27.3957	525.095	27.3957	1035.6	29.2	1058	95	1049	131	567.691	56.0805	694.021	53.7849	580.221	63.6491			443.6	18.032
467.335	61.4662	496.14	45.0748			529.024	39.5874	577.541	73.4274	551.325	21.0933					516.561	22.1163	517.983	15.2786	526.396	27.7407	526.396	27.7407	1036.3	133.8	1064	201	1068	82	571.353	18.8087	707.891	31.0692	580.691	32.7675			1070.3	33.516
470.628	16.633	497.701	29.8917			531.95	38.3247	578.171	28.0047	551.458	17.1037					517.702	39.3157	518.473	24.114	527.083	33.6783	527.083	33.6783	1040	51	1088	54	1084	52	576.594	29.7843	738.699	27.8553	584.473	34.7229			1190.2	24.304
471.141	45.4237	498.49	57.1222			532.221	31.7347	578.85	37.442	553.437	14.7424					520.157	13.8679	518.628	54.9385	527.809	42.8137	527.809	42.8137	1040.3	34.6	1090	49	1101	58	583.338	11.1545	763.638	52.6948	584.54	27.7098			1031.3	21.756
478.779	71.1533	504.721	78.0286			536.822	38.8772	578.974	12.1225	553.448	22.6764					521.966	27.6242	518.736	52.7439	531.162	55.7119	531.162	55.7119	1042.9	29.8	1121	79	1109	68	583.608	26.671	764.689	65.8811	584.815	26.298			1359.3	40.768
481.975	1006.55	506.112	16.2752			536.964	57.8908	582.799	45.0203	554.39	23.8776					524.449	23.5298	519.546	67.5657	531.469	43.9089	531.469	43.9089	1047.2	42.2	1130	65	1109	45	585.493	52.7232	778.484	34.3559	584.911	31.1158			710.6	24.892
499.385	73.6234	507.599	52.0153			539.154	69.0835	585.18	41.3947	561.464	26.1591					527.065	41.1835	521.713	23.2205	534.052	30.8833	534.052	30.8833	1058.1	73.4	1142	106	1135	57	585.517	37.8367	810.662	96.3926	586.664	33.095			1063.8	24.304
526.036	32.0988	516.435	28.5173			541.824	29.4754	589.607	22.1729	561.493	54.3683					527.289	49.6554	525.011	37.7742	535.867	44.4811	535.867	44.4811	1059.8	26	1149	147	1139	64	589.24	13.5147	832.68	31.3909	586.756	33.0128			449.5	15.288
528.49	69.3307	517.183	41.645			542.666	23.5203	590.438	27.0287	562.708	13.4969					529.268	30.1918	525.023	51.1606	536.033	49.4527	536.033	49.4527	1061.4	62	1168	40	1152	71	591.836	16.1728	839.256	27.3678	587.076	38.299			1861.7	18.032
532.071	49.5833	521.738	80.8659			545.946	29.27	591.776	13.5023	563.005	54.1576					529.815	15.9266	525.22	39.8642	536.815	94.528	536.815	94.528	1074.2	92.4	1187	89	1172	46	594.443	14.5372	847.689	32.8331	587.126	18.155			458.1	16.464
538.798	42.8695	522.847	29.208			550.602	38.3625	592.986	15.5329	565.676	25.5813					530.025	15.8981	530.725	34.2623	541.784	31.1281	541.784	31.1281	1084.9	163.6	1190	127	1179	165	594.909	11.3657	855.667	41.4975	589.895	39.7962			436.1	14.504
539.538	90.429	523.83	45.4221			553.022	38.7663	593.317	13.16	568.505	65.7631					532.155	16.5194	530.902	27.9788	542.371	28.8435	542.371	28.8435	1116.4	35.2	1193	48	1183	57	604.837	11.5466	863.908	35.5657	591.356	28.5134			1057.3	41.748
543.099	50.0441	524.134	32.0416			562.424	32.8509	594.162	49.6885	572.484	85.6927					532.195	31.8439	531.356	72.5285	546.446	46.1418	546.446	46.1418	1124	105.2	1208	87	1183	62	620.092	41.9755	868.249	39.0252	592.096	26.5453			466.2	13.524
550.595	88.7355	525.523	34.4974			565.078	54.2799	595.989	17.2145	575.141	37.5152					533.574	77.2147	532.086	16.6023	546.823	35.4895	546.823	35.4895	1127.6	61.2	1228	57	1190	55	620.765	26.6316	869.986	29.4032	592.786	53.8411			477	16.072
554.465	33.3342	527.399	39.1624			566.435	35.5737	596.157	15.7864	578.947	13.9983					534.502	26.6846	532.23	37.6311	547.1	30.9156	547.1	30.9156	1133.5	150.6	1235	49	1196	66	622.218	51.3656	881.505	104.111	593.175	18.5699			457.4	14.504
557.276	22.9543	530.695	971.734			567.606	60.9875	597.499	70.2118	580.024	22.5543					535.534	24.0406	534.118	16.6885	547.282	40.1802	547.282	40.1802	1139.1	38.6	1252	27	1212	37	630.028	24.609	885.046	35.6729	593.592	33.621			1233.8	31.36
565.051	26.0993	531.134	16.3889			570.21	87.1177	597.68	58.6448	581.859	41.3101					537.002	32.4598	534.415	30.7485	547.83	28.6142	547.83	28.6142	1153.4	62.6	1254	46	1257	63	630.03	22.8086	905.011	37.7035	594.137	48.0665			1380.8	29.4
566.417	18.1082	531.916	40.8941			573.199	30.5267	599.954	37.9944	582.735	21.7819					538.359	51.0274	534.582	31.2801	549.228	28.8067	549.228	28.8067	1158.2	65.4	1258	117	1259	66	634.988	29.994	926.965	71.5916	595.917	36.1913			1095.1	37.436
591.525	104.351	533.305	43.444			573.388	52.0954	601.165	45.3293	584.151	57.3849					540.403	12.2574	534.953	23.7002	549.408	43.783	549.408	43.783	1159.2	51.2	1287	35	1262	78	651.725	12.3973	934.815	56.8587	596.426	19.9012			1110.8	27.048
593.577	36.9976	533.771	61.7628			577.575	46.5916	602.536	23.7699	585.862	104.861					542.736	43.5643	535.038	22.8161	549.773	85.8596	549.773	85.8596	1160.4	125.2	1295	70	1289	60	669.476	30.6497	945.927	46.5629	597.344	23.7887			1189.4	29.988
614.521	29.9355	533.98	101.248			580.917	39.4011	603.112	37.4979	588.697	47.0019					543.527	90.1291	536.175	37.2867	552.672	59.4231	552.672	59.4231	1160.8	38.4	1322	89	1307	48	678.218	31.2868	948.334	36.0661	598.705	42.9759			1111.1	36.26
629.251	23.7154	539.475	21.5436			581.451	36.9422	604.918	42.5299	595.473	60.0997					543.531	26.2058	538.017	34.2907	553.373	58.5936	553.373	58.5936	1165.6	90.8	1326	61	1311	128	731.747	24.4878	951.42	48.9074	599.189	19.2659			1087	25.284
729.068	69.8595	539.883	98.6619			584.592	31.4369	611.032	19.7755	596.813	32.6448					543.723	21.348	540.125	60.1178	554.093	27.5749	554.093	27.5749	1168.1	24	1339	411	1314	30	739.091	41.7582	953.414	99.5081	599.799	27.0081			1112.8	37.24
775.823	64.2704	540.468	25.6672			584.936	42.9258	611.574	39.6026	597.618	73.9758					544.609	22.2925	540.35	14.5719	554.83	29.3233	554.83	29.3233	1168.8	11	1348	27	1355	68	749.737	14.1556	956.727	67.7748	600.882	35.9087			464.6	10.78
775.934	215.993	542.078	29.2585			588.115	42.9038	616.393	25.3946	598.952	29.9511					545.187	24.3722	540.57	33.7436	556.467	28.9244	556.467	28.9244	1169.3	392	1361	39	1383	71	781.293	45.62	957.855	47.0665	603.56	84.6063			1116.5	36.848
798.58	55.6799	543.154	13.9826			588.773	45.6051	619.969	29.0114	600.159	33.1686					545.363	53.7474	540.854	49.3889	556.727	87.4028	556.727	87.4028	1169.6	309.8	1380	53	1387	89	822.001	33.031	960.373	38.4414	603.831	78.4339			460.5	9.016
860.196	113.786	544.151	96.7885			594.567	30.9304	626.89	58.2736	603.818	61.6078					545.493	50.7185	540.889	73.2337	562.945	34.9734	562.945	34.9734	1171	30	1382	82	1391	73	830.533	21.1959	962.119	35.0514	604.631	17.7506			1072.3	21.364
862.864	107.33	545.31	18.5278			595.032	31.5877	626.987	83.7701	603.957	72.1945					546.696	31.5944	541.474	30.6281	563.43	45.2804	563.43	45.2804	1172.6	87.8	1391	57	1421	68	853.045	19.1764	964.673	47.7584	605.047	44.7112			1064.1	17.052
913.158	146.058	547.504	27.2418			596.787	50.325	633.608	21.9245	604.679	36.6949					547.481	39.5707	542.613	37.8094	564.45	63.8122	564.45	63.8122	1172.8	38.6	1397	110	1422	47	926.673	49.3723	970.929	43.9633	605.937	35.5626			1037.8	33.32
925.137	180.142	549.189	52.5202			597.015	48.282	635.344	23.9949	609.739	73.9774					550.278	61.2334	543.919	12.8805	567.621	39.0518	567.621	39.0518	1174	67.6	1397	53	1443	30	927.99	26.1016	971.262	136.676	606.957	24.4968			461.8	8.82
930.419	257.008	551.983	25.981			599.353	44.8771	637.533	17.9669	610.074	28.9815					553.208	31.3657	544.204	102.217	569.749	35.1522	569.749	35.1522	1175.7	353.4	1403	155	1498	40	979.463	26.1701	971.627	50.8665	610.152	55.0747			467.1	9.408
930.73	119.913	553.702	26.0281			599.887	48.9694	640.35	17.0827	615.904	54.3934					554.887	59.2936	544.424	16.9877	570.933	90.1783	570.933	90.1783	1176.8	33	1407	87	1513	61	986.491	160.043	974.063	94.8184	610.669	55.7735			510.3	14.504
952.852	295.269	555.802	18.4084			600.195	38.5938	645.397	14.2811	616.63	33.6723					555.29	30.1143	544.48	33.384	580.804	45.7919	580.804	45.7919	1178.2	59.8	1414	194	1537	72	1000.88	281.559	975.134	80.7533	611.682	22.4973			452.8	18.424
960.788	192.306	558.196	68.9793			605.269	29.8559	647.136	45.5252	617.415	64.2342					557.965	42.3303	547.4	36.165	581.007	33.7023	581.007	33.7023	1178.9	22.4	1435	86	1614	49	1003.32	65.7859	977.178	42.6029	615.833	31.8259			445.3	11.76
968.296	405.315	558.784	27.6329			614.539	80.0159	659.818	33.9258	619.293	29.0623					559.842	49.2516	548.339	23.8056	581.183	91.7199	581.183	91.7199	1180.1	113.4	1447	185	1644	76	1026.91	108.549	979.965	36.1453	621.639	19.7235			1158.5	39.788
969.437	246.901	559.582	49.4873			615.776	42.0777	668.62	15.6163	619.731	84.6599					560.433	39.0654	549.251	88.9884	582.173	26.9378	582.173	26.9378	1184	24.2	1466	66	1705	67	1031.53	65.5446	984.121	45.3453	624.385	31.7648			448.3	11.76
971.434	297.079	559.751	67.2234			623.721	42.5204	673.17	24.1951	624.127	29.9075					560.53	44.3968	549.975	62.3539	589.248	53.9973	589.248	53.9973	1184.4	31.2	1492	91	1737	35	1039	72.9587	984.765	47.1598	625.066	28.7324			1078.5	46.844
981.375	351.744	560.004	37.3953			625.815	32.7731	681.959	58.2203	626.741	27.5096					563.101	16.9423	550.048	28.5258	592.825	32.6572	592.825	32.6572	1187.2	52.6	1498	85	1737	43	1043.9	116.737	990.648	153.074	625.842	55.9782			1224.2	15.288
985.262	142.276	561.672	74.5804			627.748	32.5833	698.833	60.6886	627.926	31.1106					565.053	32.9608	552.439	29.6043	593.112	61.5556	593.112	61.5556	1191.1	20.6	1528	55	1762	36	1061.15	146.994	993.587	62.7696	627.406	52.3989			2156.6	12.74
988.909	108.786	562.794	32.534			629.362	38.8267	712.638	78.182	629.448	23.862					566.584	82.6745	554.035	33.0176	593.73	77.4908	593.73	77.4908	1192.3	97.8	1544	161	1784	30	1103.47	40.0912	996.56	56.2241	627.475	38.4861			1484.9	20.188
988.983	65.0496	567.903	25.9484			637.045	44.0886	731.253	32.539	629.453	42.4586					566.915	21.72	554.534	19.3211	594.733	37.6394	594.733	37.6394	1192.8	75.2	1570	66	1822	54	1130.36	175.813	999.573	53.9872	629.03	34.3779			1080.6	24.892
991.586	92.3371	571.908	99.7723			637.174	40.4712	733.479	24.911	629.551	68.2545					569.458	26.2891	555.987	56.2622	598.241	54.0772	598.241	54.0772	1196.1	42.8	1578	108	1824	41	1139.19	63.5787	1000.86	92.1232	630.108	62.6295			1077.6	33.712
992.855	108.621	574.992	77.0328			637.246	53.3959	744.996	30.7482	629.67	35.6556					570.111	31.1451	558.606	35.8949	599.873	41.39	599.873	41.39	1197.8	75.6	1637	115	1833	39	1197.35	69.1772	1002.68	69.8098	631.353	25.0723			1084.7	20.972
997.98	358.261	582.774	38.0313			637.703	169.08	746.466	54.7079	631.408	45.8783					571.793	22.1415	559.981	16.9467	605.836	40.4123	605.836	40.4123	1197.8	88.6	1666	49	1835	80	1206.88	129.078	1012.65	95.4792	634.177	15.5743			459.6	14.112
998.634	168.541	588.768	103.875			639.552	32.9929	842.451	142.018	643.58	22.1653					574.205	63.3846	559.995	36.984	607.199	54.496	607.199	54.496	1199.9	66	1668	49	1848	26	1233.94	103.73	1013.63	123.556	634.654	24.9768			1187.4	23.912
1000.4	158.469	588.974	17.5117			641.517	39.3781	924.26	143.661	644.066	65.0555					575.593	35.619	560.715	23.2267	610.819	33.1239	610.819	33.1239	1201.3	36	1704	61	1860	42	1496.84	171.509	1018.07	96.0117	648.417	37.1555			482.3	15.092
1000.57	76.106	589.863	109.291			641.747	47.3837	931.644	178.993	647.435	41.4486					575.961	68.734	562.44	83.3479	611.609	59.8977	611.609	59.8977	1201.7	27.2	1716	44	1863	45	1499.58	71.4882	1018.94	117.963	651.017	28.9902			1386.3	18.816
1001.41	281.046	590.142	41.9369			642.666	35.6936	943.064	99.6668	650.481	40.701					577.038	35.5471	566.33	27.5469	611.824	85.1094	611.824	85.1094	1202	121.2	1718	50	1863	42	1551.25	112.724	1021.7	124.011	653.602	32.5649			449.8	14.504
1001.43	93.1745	591.526	40.3441			656.625	35.4867	943.886	109.369	650.632	37.1815					581.193	33.9699	567.66	53.2434	614.15	69.8447	614.15	69.8447	1202.9	68.8	1729	47	1864	53	1553.66	72.8794	1023.55	83.7492	654.118	23.3253			450.2	14.896
1005.28	48.6737	592.258	42.9516			656.774	40.8877	946.608	119.326	656.332	43.3609					582.824	43.3015	575.635	34.4167	615.211	43.5754	615.211	43.5754	1204.4	24	1738	91	1866	49	1773.93	36.52	1024.06	80.0981	672.244	42.4316			1267.2	30.576
1005.97	280.918	595.284	27.4816			657.945	38.1409	949.457	157.562	657.764	53.6439					584.187	29.2614	575.666	16.8874	628.56	118.168	628.56	118.168	1204.6	12.6	1746	111	1879	93	1807.86	118.568	1028.87	103.957	676.855	37.2316			1084.5	25.48
1008.61	172.902	596.22	39.1563			659.16	59.1348	959.703	142.204	665.366	15.7838					586.417	53.4866	576.759	90.8542	629.97	89.1303	629.97	89.1303	1204.7	30.2	1781	49	1884	41	1987.01	98.9537	1031.11	61.7765	679.922	33.8188			1052.2	19.992
1008.76	191.542	599.792	28.1102			662.137	35.1395	963.411	138.268	670.977	40.3374					586.835	78.3928	581.615	20.7912	631.729	101.252	631.729	101.252	1204.9	56.4	1787	209	1889	71	2004.42	35.5198	1033.21	66.6058	690.177	39.1317			1891.7	15.484
1014.71	116.557	600.102	60.5427			662.888	48.93	964.06	186.053	696.005	33.9581					587.655	24.1098	591.891	21.935	636.406	42.0206	636.406	42.0206	1205.6	64.4	1799	49	1889	42	2042.29	141.178	1035.09	163.464	711.578	21.3767			450.4	15.484
1017.8	97.708	600.427	19.3864			669.542	48.5888	975.497	121.734	720.505	33.7137					588.546	38.8043	598.255	80.1707	637.473	60.1525	637.473	60.1525	1205.6	19	1825	48	1912	34	2054.29	80.8655	1039.32	182.986	716.116	44.1077			1030.9	24.108
1019.67	187.006	603.388	47.8215			682.121	58.416	984.186	125.789	764.309	27.8774					588.629	47.2065	599.425	28.3881	639.281	60.8012	639.281	60.8012	1206.1	32.2	1855	57	1929	48	2166.76	63.8048	1042.77	103.715	740.317	76.5484			1097.1	21.56
1020.99	132.634	615.622	23.7944			737.88	64.604	1003.64	112.537	774.943	22.6811					589.5	63.4874	603.322	19.2474	642.385	32.3373	642.385	32.3373	1206.2	81.8	1865	162	2016	61	2173.6	55.0507	1044.46	86.7917	749.91	31.5122			469.4	14.308
1025.18	118.462	620.72	70.043			739.22	45.6569	1017.79	76.0453	776.741	24.5837					592.443	17.7342	605.105	19.9635	644.21	35.4117	644.21	35.4117	1206.3	80.4	1866	69	2024	57	2177.48	76.2697	1049.32	123.08	749.961	38.2302			447.2	15.876
1027.69	219.291	621.217	123.201			754.22	60.8878	1019.92	116.776	788.043	55.8005					592.962	15.9671	605.604	29.2702	646.671	66.1539	646.671	66.1539	1207.2	107.4	1877	57	2048	151	2590	46.3898	1051.25	142.483	763.628	63.6602			446.5	15.288
1028.24	85.7431	622.436	20.7781			759.034	38.1387	1027.96	67.704	815.231	87.2129					593.758	34.1548	605.822	48.6022	648.39	34.5002	648.39	34.5002	1208.7	17.6	1892	117	2579	27	2642.86	52.4613	1051.6	153.361	780.533	35.9736			1103.6	21.952
1028.3	65.4107	623.087	37.2006			766.996	33.8414	1035.39	262.651	847.081	162.852					595.538	26.7799	614.144	52.1725	650.574	44.961	650.574	44.961	1209.7	30.2	1895	50	1178	84	377.751	7.92497	1055.87	117.223	804.791	67.2578			456.2	12.348
1028.53	112.221	624.04	73.7124			769.408	57.696	1036	76.4421	874.18	213.713					598.084	52.3082	617.08	23.7965	660.526	55.2778	660.526	55.2778	1210.4	38	1898	80	1100	64	378.149	63.3916	1059.96	116.441	808.373	31.316			2621.3	15.092
1029.49	104.077	626.998	29.8227			776.177	62.0317	1036.19	112.947	875.899	198.859					598.853	22.4197	617.938	62.5749	661.956	58.068	661.956	58.068	1211.1	27.2	1901	91	1220	67	418.919	39.9921	1063.42	82.9994	811.362	44.1377			426.1	11.564
1031.61	137.003	628.204	15.4878			780.737	46.4635	1040.02	172.13	879.571	76.3354					599.573	37.5798	622.616	38.2522	693.21	66.5739	693.21	66.5739	1211.6	70	1905	57	491	15	432.721	11.3837	1065.6	107.979	849.775	39.3424			1116.8	19.6
1033.9	134.328	628.92	18.6562			786.85	45.6079	1041.54	123.661	902.868	176.059					601.662	25.7034	623.515	20.5457	730.754	112.62	730.754	112.62	1211.7	33	1937	48	1305	93	456.276	10.7483	1069.8	95.2157	852.568	83.676			1171.1	25.284
1033.96	98.4067	629.296	20.3057			804.05	49.0044	1041.82	73.6345	906.591	213.962					602.67	80.6307	626.175	17.7678	746.927	55.7369	746.927	55.7369	1212.1	52.6	1944	175	990	37	458.18	20.8755	1076.96	90.6249	857.478	109.376			441.2	12.348
1036.33	81.9436	633.337	26.308			808.623	46.4324	1044.97	59.1729	918.303	194.746					602.899	28.1203	628.185	21.9047	756.126	54.3826	756.126	54.3826	1213.8	16.2	1974	34	383	21	465.023	12.3826	1080.72	89.6527	866.201	56.4901			1080.7	32.536
1037.77	208.551	637.689	14.8768			810.799	45.9556	1054.33	118.258	926.982	176.954					605.771	24.97	631.406	74.1983	763.877	53.6577	763.877	53.6577	1214.3	23.4	1979	32	345	19	469.944	22.4799	1086.31	150.23	867.428	34.3175			419.7	11.564
1040.15	204.976	645.324	28.4348			825.849	55.3802	1058.08	123.101	930.232	105.668					606.969	22.7286	640.631	30.4061	787.888	91.3308	787.888	91.3308	1220.7	43.2	2016	69	1025	87	476.272	17.8132	1088.02	79.9748	880.292	38.7879			443.6	11.956
1041.64	348.474	648.479	59.1941			827.819	81.6074	1061.17	63.7347	946.658	102.593					608.944	24.3526	641.043	21.2751	789.964	91.3926	789.964	91.3926	1221.4	51.4	2025	47	1343	76	476.37	33.6131	1089.59	237.579	881.886	126.008			1117.1	18.032
1047.52	96.3524	652.391	58.4453			847.488	61.5708	1064.49	199.39	950.857	87.5279					612.106	24.3674	641.305	59.8482	831.695	248.092	831.695	248.092	1223.2	152.8	2025	35	1196	65	477.478	25.6805	1091.84	145.013	891.737	40.8452			1824	17.052
1050.43	107.205	655.631	86.4352			851.781	75.966	1067.29	143.04	963.468	136.426					614.432	104.702	644.067	38.6448	882.006	128.669	882.006	128.669	1225.6	47.2	2032	206	1068	81	479.16	15.2389	1096.61	121.093	899.651	52.2428			695	27.636
1050.43	152.868	659.269	30.7792			852.465	62.0541	1070.44	76.526	965.117	61.0434					618.072	21.3214	646.338	75.3878	902.778	156.87	902.778	156.87	1229.8	76.8	2040	46	523	21	485.477	43.3978	1104.64	115.812	908.01	104.705			451	28.616
1052.86	170.58	673.096	38.9251			860.373	73.7465	1070.6	64.853	967.732	134.644					619.091	55.274	647.813	36.8838	907.633	148.512	907.633	148.512	1234.7	35.8	2049	81	674	25	492.805	22.4885	1113.9	297.835	919.691	45.4886			508.7	17.248
1053.74	255.489	683.235	30.4978			875.7	63.0218	1076.83	192.737	969.321	93.8158					619.48	30.6903	650.784	46.1125	963.656	329.048	963.656	329.048	1252.2	140.6	2058	85	1079	53	493.179	12.9142	1115.84	65.9713	922.058	66.235			443.5	11.956
1054.33	94.7095	706.241	106.668			891.768	71.7654	1078.13	143.418	972.086	188.574					619.857	32.265	651.261	73.3626	975.794	365.117	975.794	365.117	1253.2	58.4	2068	223	454	14	494.183	9.51432	1121.62	170.234	922.452	50.274			1344.9	22.932
1056.1	75.825	712.919	21.7949			911.161	66.0434	1079.47	314.041	976.631	126.128					621.782	38.2074	656.109	26.0734	976.384	120.703	976.384	120.703	1263.6	30	2088	50	919	36	494.492	28.2746	1123.53	187.393	926.981	26.2575			446.9	10.388
1056.51	81.5447	716.239	29.6858			916.417	67.984	1086.91	146.234	977.745	104.651					622.647	37.8918	658.134	40.9212	979.084	147.264	979.084	147.264	1289.5	263.8	2090	131	591	26	501.802	29.8351	1136.31	136.829	929.237	34.4574			450.9	10.192
1060.13	298.046	717.035	71.7591			951.789	116.61	1087.96	124.652	983.706	258.893					623.693	25.3273	672.093	57.7643	979.261	220.821	979.261	220.821	1480.3	41.4	2109	60	883	35	502.462	18.175	1139.4	57.2522	931.843	71.3991			990.8	77.224
1061.09	148.194	729.982	47.3245			957.026	67.174	1088.89	128.94	984.901	75.0723					625.131	30.0168	673.168	31.0198	982.779	174.84	982.779	174.84	1654.6	64.2	2124	182	1639	100	509.325	40.3534	1142.88	203.379	940.044	50.8673			444.7	13.132
1063.22	170.101	733.426	81.5488			979.173	73.4136	1089.3	326.193	1000.16	98.7309					626.539	26.1876	675.558	40.5825	986.418	166.757	986.418	166.757	1663.2	72	2137	213	489	26	512.63	19.3169	1142.97	73.5677	940.363	53.127			1824	17.052
1063.53	190.253	752.392	42.9892			989.836	58.3911	1098.7	74.7528	1005.93	138.955					627.126	86.0821	676.067	37.1192	986.508	185.679	986.508	185.679	1686.7	83.4	2142	25	619	41	512.912	11.9315	1143.66	85.3845	952.501	36.2665			695	27.636
1063.61	80.4514	787.159	116.933			991.956	48.0719	1101.28	115.703	1011.81	189.778					628.272	28.5932	680.491	33.8535	987.211	133.84	987.211	133.84	1778.1	16	2146	177	2053	43	514.897	15.7369	1143.71	144.838	955.317	74.3822			451	28.616
1067.64	302.218	788.265	96.8727			992.245	54.2518	1101.34	108.053	1012.51	138.414					628.286	23.3011	680.537	79.2178	988.767	166.773	988.767	166.773	1780.9	11.2	2190	23	562	24	520.082	24.9828	1145.09	245.497	955.994	85.6253			508.7	17.248
1067.67	141.479	792.088	44.7101			994.385	55.1919	1103.46	100.264	1013.96	177.795					637.717	59.3654	688.581	48.2867	990.632	270.538	990.632	270.538	1782.4	36.4	2232	75	1319	104	524.143	28.9959	1153.47	88.3733	956.024	58.6697			443.5	11.956
1072.8	99.3024	792.457	33.4919			996.464	48.6961	1107.83	87.4066	1016.74	93.0619					638.968	31.0824	689.017	87.9589	993.187	178.499	993.187	178.499	1847.3	37.8	2299	48	952	31	525.334	12.3098	1157.94	86.5573	963.616	88.6488			1344.9	22.932
1073.09	296.074	795.103	19.651			1000.35	54.8598	1115.45	93.2549	1017.34	141.777					642.297	26.3285	690.746	41.7072	994.367	268.28	994.367	268.28	1874.8	8.2	2566	59	419	24	527.807	10.6423	1160.81	148.267	965.432	58.5879			446.9	10.388
1079.4	144.994	809.333	257.671			1006.58	48.9148	1118.76	108.966	1021.02	145.046					643.234	48.9532	697.587	59.5027	996.069	358.628	996.069	358.628	1881.9	26.6	2607	64	206	12	529.005	20.8231	1161.13	102.961	972.421	49.3768			990.8	77.224
1080.29	123.864	831.265	156.887			1008.68	54.8104	1124.84	66.9623	1022.78	119.663					643.926	29.5479	758.368	42.9402	996.899	148.048	996.899	148.048			2610	56	2079	51	532.173	10.216	1161.66	79.7768	973.707	83.8112			444.7	13.132
1080.8	137.506	917.217	123.745			1012.27	47.637	1128.49	78.8331	1024.21	108.669					644.428	64.9407	775.702	31.5013	1003.09	112.009	1003.09	112.009			2639	37	1323	70	538.844	10.3388	1162.18	131.047	979.948	63.5645			525.4	25.872
1083.1	194.45	917.744	116.483			1012.44	59.6266	1132.08	326.27	1025.25	111.919					652.804	28.1752	795.499	104.196	1006.67	245.378	1006.67	245.378			2750	27	491	33	543.716	13.4526	1166.1	122.698	980.986	55.2532			434.9	14.112
1083.69	204.311	947.271	180.4			1014.65	79.5654	1134.16	149.175	1026.74	198.225					656.208	51.1431	894.766	108.521	1008.88	123.621	1008.88	123.621			2792	69	1722	41	546.423	27.5575	1167.58	176.766	994.289	182.04			457.7	14.896
1084.36	96.3574	952.684	96.9368			1019.96	44.6351	1138.95	120.655	1028.03	226.025					663.623	27.2087	907.378	144.035	1009.83	158.795	1009.83	158.795			2840	21	1285	66	556.514	17.7012	1168.39	199.832	996.738	97.032			1239.4	58.604
1087.29	361.684	955.246	114.795			1021.9	155.099	1141.24	113.185	1032.96	153.183					666.684	83.7989	929.597	134.65	1010.87	347.22	1010.87	347.22			3280	69	487	18	556.747	34.2433	1168.43	95.3858	1016.77	250.615			443.1	14.112
1088.38	95.0248	958.014	176.381			1028.14	118.491	1150.14	131.709	1038.18	118.446					671.897	48.2812	936.915	166.108	1010.94	100.658	1010.94	100.658			482	18	1569	89	558.883	54.6052	1174.24	76.2562	1030.39	77.5117
1088.91	50.717	959.167	157.241			1030.13	53.8084	1166.11	189.222	1040.77	182.298					677.137	38.352	959.243	145.655	1012.95	99.7237	1012.95	99.7237			506	36	1220	46	571.515	22.3141	1178.16	120.598	1030.82	92.3304
1091.67	205.296	960.736	318.411			1031.92	65.3308	1166.34	107.723	1043.98	107.377					681.839	83.0649	978.675	144.287	1020.3	136.906	1020.3	136.906			510	24	2146	72	584.582	13.4126	1180.17	83.7379	1033.48	113.995
1091.98	285.59	969.057	86.1831			1032.41	54.3536	1180.28	93.448	1044.48	342.547					707.011	35.1165	981.512	174.584	1021.91	158.898	1021.91	158.898			523	34	1129	57	589.154	12.8372	1181.43	83.2853	1056.8	133.38
1094.42	193.962	985.73	207.163			1033.26	94.1939	1182.21	391.931	1044.83	70.5755					711.919	25.5503	982.279	128.799	1026.61	159.911	1026.61	159.911			533	27	1995	50	591.294	11.2997	1183.07	111.378	1073.49	120.471
1095.68	107.061	985.962	87.2429			1033.94	71.5243	1184.63	125.287	1059.16	123.8					718.926	72.1176	983.908	93.6527	1026.67	303.11	1026.67	303.11			533	36	1517	53	593.949	42.6694	1183.51	73.1945	1078.79	184.723
1098.57	336.927	988.723	214.818			1034.34	91.5826	1188.8	116.665	1062.06	99.7421					726.53	39.5975	993.072	242.694	1033.2	166.663	1033.2	166.663			535	14	660	35	599.322	42.0075	1184.91	280.457	1081.49	99.0727
1101.13	349.207	994.142	192.887			1034.94	76.7841	1196.43	88.7415	1066.98	126.215					733.314	62.9008	999.821	124.91	1036.73	153.041	1036.73	153.041			540	20	1045	69	601.716	29.5287	1186.72	67.9439	1083.37	73.7824
1102.32	201.168	995.052	110.342			1035.64	94.1216	1198.95	83.2329	1069.92	101.86					749.57	25.9716	1007.15	59.9976	1040.24	286.176	1040.24	286.176			550	26	1154	59	602.836	19.1069	1189.32	67.8372	1085.28	139.882
1108.57	87.9672	1001.49	99.9746			1036.66	108.27	1200.56	75.0865	1070.65	355.003					755.935	50.3599	1010.36	103.22	1041.01	368.548	1041.01	368.548			553	24	1056	56	611.376	25.781	1189.77	70.1838	1093.01	125.103
1108.94	161.325	1009.96	195.175			1039.57	99.9961	1203.07	68.6812	1079.74	186.256					757.842	32.5982	1012.07	239.647	1042.4	161.291	1042.4	161.291			554	38	529	25	619.783	35.9281	1190.19	136.037	1100.29	83.5462
1110.73	64.1389	1010.98	347.671			1041.62	82.3439	1223.81	95.9917	1084.46	99.6903					766.355	27.7577	1014.13	102.818	1043.28	201.901	1043.28	201.901			560	36	1218	72	622.093	28.465	1191.84	83.0494	1136.55	74.2109
1116.97	95.2624	1012.54	215.44			1041.88	61.3124	1225.32	79.0505	1091.81	125.021					777.152	55.9983	1016.26	78.8187	1046.65	143.381	1046.65	143.381			562	32	1345	119	629.677	41.5133	1192.7	100.095	1140.58	100.599
1122.32	363.781	1014.59	90.5955			1050.45	63.4613	1237.8	90.6047	1095.84	78.6473					794.102	44.0149	1017.21	243.998	1047.02	112.282	1047.02	112.282			563	37	371	18	632.877	15.0701	1193.85	117.605	1143.38	75.1301
1125.66	199.591	1017.58	374.032			1059.63	83.3497	1238.96	150.097	1099	147.403					802.833	42.5501	1018.09	149.543	1048.76	262.745	1048.76	262.745			564	32	382	20	636.888	53.9732	1195.94	122.85	1144.8	81.1904
1129.85	92.2393	1022.66	217.423			1064.67	55.1315	1244.48	239.263	1100.37	180.404					820.599	41.0441	1025.47	141.989	1051.36	148.263	1051.36	148.263			567	26	1983	42	645.657	23.2235	1199.03	197.55	1152.56	91.9583
1131.97	315.887	1029.14	141.35			1070.37	80.8039	1249.02	102.183	1105.09	173.841					821.708	76.1726	1028.05	152.702	1052.53	273.81	1052.53	273.81			568	11	1137	63	665.374	60.9433	1205.53	73.2914	1153.18	189.007
1134.21	82.3271	1038.19	226.976			1071.13	101.239	1249.46	129.177	1112.79	101.184					825.552	58.3094	1028.81	197.161	1064.72	124.155	1064.72	124.155			574	44	1137	75	676.762	55.8934	1206.35	70.8387	1170.47	86.6823
1138.92	150.271	1039.34	70.502			1071.63	118.123	1258.87	90.0375	1135.84	261.068					873.07	115.372	1031.55	77.4651	1066.1	239.654	1066.1	239.654			577	37	1531	55	694.259	35.4102	1210.35	125.373	1182.94	98.1741
1143.44	99.3749	1043.69	114.376			1071.63	98.6994	1265.35	78.0855	1136.5	193.951					877.431	65.4548	1034.23	84.2094	1069.88	149.162	1069.88	149.162			579	34	654	23	721.407	32.6239	1210.48	102.82	1197.3	88.001
1143.64	206.175	1052.61	208.58			1071.95	84.6652	1268.95	104.97	1141.05	174.42					891.135	30.4567	1043.17	264.9	1078.38	148.043	1078.38	148.043			579	35	1215	126	781.323	20.7504	1212.5	82.4658	1221.16	168.255
1151.21	146.063	1058.22	229.108			1072.62	61.9552	1292.15	308.867	1145.17	361.2					901.283	63.5686	1044.55	80.7718	1090.63	117.715	1090.63	117.715			580	17	1199	92	801.669	37.5406	1213.77	83.731	1224.5	117.607
1152.11	49.8488	1061.22	100.32			1073.36	185.445	1296.5	69.6162	1148.58	141.112					901.849	39.6503	1047.98	171.455	1094.86	135.187	1094.86	135.187			584	28	807	40	846.444	120.733	1217.19	120.077	1270.43	79.1231
1152.4	88.7294	1063.93	208.298			1082.78	65.7636	1297.51	296.743	1153.91	104.034					910.061	41.2252	1049.21	167.471	1098.97	335.931	1098.97	335.931			584	34	501	21	869.418	38.5524	1218.61	75.3203	1275.35	84.9375
1154.2	123.359	1085.53	258.439			1087.04	77.2956	1311.6	79.2539	1155.46	192.165					913.011	44.0926	1068.49	185.479	1099.05	151.147	1099.05	151.147			586	24	1026	117	947.245	247.451	1220.35	96.6181	1290.06	122.852
1158.59	90.8221	1089.96	248.495			1087.24	148.401	1313.73	99.148	1163.25	60.4678					916.831	102.931	1074.07	148.109	1102.89	385.774	1102.89	385.774			586	20	729	39	1005.99	103.578	1223.47	98.9072	1312.94	85.9028
1163.1	155.962	1091.46	91.1944			1090.75	66.6528	1325.8	288.483	1164.84	257.303					930.135	31.5356	1083.55	168.388	1109.11	178.561	1109.11	178.561			587	30	1151	102	1008.64	57.6677	1226.41	81.3207	1314.45	143.101
1165.25	233.269	1092.7	87.7701			1091.6	93.0051	1331.91	168.483	1179.84	172.975					943.055	35.0309	1091.7	144.742	1113	132.359	1113	132.359			587	22	323	20	1010.17	60.1169	1234.15	84.2531	1322.59	124.581
1167.58	163.656	1094.41	375.688			1108.08	174.605	1348.08	79.9107	1185.56	172.165					957.462	44.0597	1091.76	231.435	1115.15	190.853	1115.15	190.853			587	15	1856	81	1011.8	84.365	1240.24	74.7585	1339.31	79.5267
1169.96	87.3539	1099.95	253.069			1110.31	99.1746	1348.67	176.038	1192.56	128.123					957.977	165.082	1093.02	216.83	1121.98	191.516	1121.98	191.516			588	27	1770	54	1015.83	40.5423	1240.84	92.4439	1346.93	92.4736
1171.12	177.815	1102.93	201.561			1111.64	65.4227	1352.24	202.936	1199.68	65.1585					965.137	177.679	1111.06	276.713	1127.54	115.09	1127.54	115.09			589	17	1835	87	1017.5	84.3966	1242.74	74.0861	1363.07	175.56
1174.66	390.448	1106.3	320.754			1121.41	82.2309	1355.42	95.719	1200.24	61.7597					967.393	91.1512	1117	184.844	1128.53	147.352	1128.53	147.352			590	26	1212	108	1033.27	135.581	1243.18	87.9385	1384.69	132.002
1175.18	132.039	1108.01	145.42			1125.19	100.264	1363.71	93.9385	1205.46	101.335					968.111	44.7475	1122.41	350.282	1133.8	254.28	1133.8	254.28			590	42	604	31	1033.3	84.1885	1247.92	95.5051	1397.19	84.7563
1175.63	199.433	1108.19	83.0688			1127.89	93.4066	1375.44	57.6201	1214.91	290.768					969.273	161.718	1127.39	113.395	1138.14	137.75	1138.14	137.75			591	27	1616	140	1040.97	92.472	1250.89	70.6733	1437.98	200.833
1180.77	124.277	1119.49	217.363			1133.86	64.1054	1375.79	114.553	1218.89	155.499					978.708	81.7349	1133.41	87.7268	1140.48	347.944	1140.48	347.944			594	23	453	26	1043.55	132.408	1259.18	190.208	1471.64	78.4827
1182.67	108.384	1120.43	81.8016			1135.83	126.154	1392.49	58.4167	1220.26	92.1447					981.717	50.9882	1142.33	128.545	1141.89	145.376	1141.89	145.376			595	38	666	31	1044.17	85.3452	1280.85	199.203	1497.2	111.191
1183.32	110.89	1125.63	126.587			1140.07	214.984	1393.46	100.614	1220.63	244.256					985.366	184.255	1167.65	102.178	1150.73	179.967	1150.73	179.967			595	14	790	39	1049.64	73.033	1283.81	79.868	1500.78	80.5971
1193.04	138.93	1129.89	177.131			1144.55	151.197	1402.27	87.1734	1231.43	116.705					985.409	42.5553	1171.44	117.165	1151.56	222.287	1151.56	222.287			597	21	987	49	1056.22	49.5437	1285.44	236.671	1503.98	70.1508
1194.25	239.304	1137.69	130.579			1147.51	85.3312	1408.98	64.8894	1232.94	81.4883					986.945	72.919	1176.24	194.913	1155.71	234.039	1155.71	234.039			599	32	981	46	1061.9	66.0169	1306	196.962	1518.69	94.5715
1198.95	63.9798	1138.72	134.574			1148.09	68.5652	1423.59	116.483	1243.96	121.318					988.356	49.7308	1176.5	76.8897	1167.5	157.286	1167.5	157.286			601	18	1129	113	1068.16	62.6575	1335.55	93.803	1520.17	74.9499
1206.4	105.623	1144.26	391.349			1149.02	85.2297	1424.11	243.583	1244.41	74.2457					988.719	30.5236	1178.37	157.602	1173.79	328.639	1173.79	328.639			603	35	710	34	1081.69	40.126	1380.88	181.777	1527.99	133.666
1210.84	311.98	1150.08	201.816			1160.49	82.9607	1480.01	56.0293	1260.55	166.62					993.67	56.585	1188	145.64	1174.42	202.356	1174.42	202.356			604	23	403.7	8.8	1084.72	106.868	1405.63	88.67	1542.04	70.4067
1212.06	122.581	1154.47	323.784			1161.06	140.436	1482.75	81.8411	1266.52	103.465					995.74	42.9554	1192.58	277.794	1189.05	275.249	1189.05	275.249			604	11	448.5	13.8	1110.93	90.7592	1406.72	117.524	1554.5	80.8516
1213.81	106.258	1167.15	117.785			1164.07	66.3878	1484.1	131.97	1269.21	84.4985					998.622	41.7482	1200.27	134.143	1193.41	167.617	1193.41	167.617			605	15	464.5	23.6	1138.7	65.3436	1409.93	183.025	1563.68	96.3299
1224.8	128.336	1169.03	177.422			1168.5	59.2888	1514.78	45.1985	1300.44	202.67					1002.44	30.8676	1215.88	291.916	1199.2	109.812	1199.2	109.812			605	34	468.3	43.8	1142.69	441.111	1424.35	97.7427	1585.4	107.638
1225.74	134.664	1170.08	218.664			1174.51	109.575	1533.04	203.61	1302.84	251.885					1005.72	65.4028	1216.56	92.8612	1204.22	149.704	1204.22	149.704			605	20	482.6	33.4	1148.57	113.756	1441.98	72.5722	1598.58	93.6877
1226.68	143.138	1182.26	85.2999			1176.68	150.351	1533.32	69.8507	1304.74	75.1907					1006.36	56.0145	1216.9	199.553	1224.64	146.066	1224.64	146.066			605	14	488.1	69.6	1164.85	98.1881	1464.09	71.7205	1612.43	235.896
1229.3	126.798	1189.04	93.1877			1183.79	125.727	1534.18	163.59	1313.84	209.447					1008.94	149.458	1224.83	138.612	1229.51	179.933	1229.51	179.933			605	42	501.5	23	1234.36	74.6283	1464.72	88.2208	1637.14	248.308
1230.16	89.2733	1194.2	114.322			1187.34	50.4708	1538.3	111.313	1315.54	131.098					1010.57	38.1833	1251.39	224.467	1231.16	221.628	1231.16	221.628			606	29	503.3	34.8	1238.87	89.8539	1486.12	156.487	1655.79	60.213
1267.06	122.093	1209.7	98.8747			1187.69	151.868	1538.93	309.583	1339.32	119.244					1015.95	62.1407	1272.91	107.583	1245.59	113.387	1245.59	113.387			607	36	506.1	11.4	1253.26	208.366	1494.71	132.843	1668.82	117.088
1271.71	274.213	1210.75	378.36			1188.95	131.245	1556.83	69.4871	1345.15	74.8452					1016.53	45.4626	1286.32	212.442	1250.49	200.566	1250.49	200.566			608	17	508.7	27.8	1287.32	45.9671	1503.8	104.478	1709.28	90.7554
1283.1	105.235	1219.9	265.702			1189.19	110.17	1558.58	41.785	1346.04	168.148					1020.26	41.6119	1316.33	241.947	1256.1	175.385	1256.1	175.385			609	29	510.2	36.6	1431.29	55.7625	1509.39	95.4887	1713.14	70.4428
1284.49	64.8939	1224.27	197.728			1190.07	109.315	1559.05	89.1187	1347.8	151.988					1022.74	45.4907	1332.36	78.7411	1282.28	193.167	1282.28	193.167			610	22	524.3	19.4	1530.77	55.747	1519.08	146.246	1719.8	76.7168
1289.26	213.38	1230.38	206.563			1194.05	146.145	1559.25	72.8587	1358.37	148.983					1025.51	37.5899	1335.34	236.904	1285	107.249	1285	107.249			610	15	524.3	12.2	1548.77	76.6521	1528.54	138.62	1746.44	99.5926
1289.85	91.8923	1346.36	89.183			1194.48	139.732	1595.12	154.32	1361.6	129.097					1028.95	68.8771	1337.98	89.9098	1286.99	212.709	1286.99	212.709			610	36	527.9	20.6	1697.92	42.0581	1535.45	240.035	1792.69	176.401
1316.43	128.164	1348.8	220.964			1197.2	200.608	1612.22	108.29	1366.47	248.981					1032.38	38.836	1379.51	113.08	1315.56	221.971	1315.56	221.971			610	30	535.5	28.8	1735.3	74.8519	1540.93	89.0976	1799.3	230.647
1317.14	162.043	1352.52	146.48			1199.5	81.1016	1645.78	55.8224	1401.13	54.0817					1038.28	134.665	1384.71	142.692	1318.21	186.288	1318.21	186.288			611	22	538.5	18.8	1792.78	74.3401	1544.98	92.5099	1802.36	87.3673
1326.37	78.3362	1360.51	191.668			1205.31	205.1	1664.35	338.422	1425.49	79.6931					1041.7	88.4785	1413.88	118.588	1330.17	163.087	1330.17	163.087			611	23	545.6	15.8	1813.7	175.933	1553.91	142.496	1811.35	129.731
1330.33	60.0105	1363	79.4231			1234.29	214.324	1678.09	67.3915	1426.26	68.9899					1065.8	31.5526	1416.07	80.7251	1340.86	152.131	1340.86	152.131			612	18	545.7	16.4	1860.54	55.6451	1645.86	131.138	1812.63	51.4157
1378.46	215.896	1366.38	114.109			1282.17	211.631	1681.43	70.673	1429.33	92.32					1069.09	95.4287	1426.51	210.33	1350.28	222.608	1350.28	222.608			613	31	561.6	60.2	1918.97	55.9692	1672.67	124.565	1859.19	63.0912
1390.78	82.8179	1379.24	286.421			1302.4	220.486	1701.49	55.5067	1444.27	98.9801					1070.7	90.4549	1467.62	84.0734	1353.55	126.617	1353.55	126.617			613	15	568.2	33.4	1970.78	50.9836	1684.71	88.4371	1863.9	83.4613
1412.6	203.367	1392.97	98.8183			1325.89	124.264	1710.64	70.3357	1464.76	62.6028					1072.01	60.6618	1521.88	88.9412	1390.24	147.417	1390.24	147.417			614	31	572	51.4	2057.54	81.5386	1688.3	237.005	1876.81	107.602
1443.29	140.068	1401.34	191.326			1328.85	259.486	1722.16	87.3885	1486.33	91.881					1097.63	24.1432	1534.83	92.9078	1409.43	174.256	1409.43	174.256			614	21	579.2	56.6	2084.32	64.7574	1723.76	66.6919	1883.11	88.827
1458.81	151.733	1436.39	119.293			1337.63	147.938	1731.59	111.709	1499.9	122.687					1125.16	105.651	1606.51	155.125	1518.85	176.364	1518.85	176.364			616	18	579.5	26.2	2177.94	90.2071	1733.18	118.439	1892.52	51.4506
1489.19	74.6873	1447.4	108.973			1338.55	253.204	1741.5	162.393	1525.66	135.21					1127.02	66.7337	1636.33	81.5554	1541.79	192.686	1541.79	192.686			617	31	585.6	16.8	2255.65	129.022	1738.8	108.85	1968.53	260.076
1513.39	143.179	1465.71	323.04			1345.31	124.447	1747.6	60.3577	1530.67	173.728					1127.25	126.102	1654.93	93.8121	1569.28	152.107	1569.28	152.107			619	23	585.8	39	2284.94	272.858	1780.38	119.53	1969.76	70.4078
1578.93	302.985	1468.09	274.151			1373.41	263.655	1767.21	137.053	1550.04	137.655					1134.55	60.3605	1700.74	118.67	1579.28	182.322	1579.28	182.322			623	41	589.5	24.2	2699.44	130.507	1790.81	69.5129	1970.6	112.298
1645.58	360.17	1483.91	111.972			1425.67	103.982	1767.9	66.3396	1553.36	133.579					1138.84	82.8352	1704.57	143.226	1618.57	248.674	1618.57	248.674			623	21	606.8	68	2714.3	74.2129	1826.11	82.5612	1982.27	154.059
1678.84	150.393	1513.77	120.282			1446.01	160.176	1780.71	130.463	1564.66	144.045					1143.74	28.8188	1733.72	51.9583	1618.72	178.327	1618.72	178.327			623	19	608.4	20	2741.97	40.1399	1830.47	54.4095	1994.79	66.3076
1688.67	131.467	1523.33	107.663			1446.3	299.936	1782.92	52.0198	1579.23	81.8099					1144.93	31.3099	1735.35	105.243	1637.59	110.14	1637.59	110.14			624	31	635.6	19.2	2989.83	44.7266	1831.78	113.319	2001.57	75.3919
1688.86	107.983	1524.4	97.3836			1465.18	246.762	1785.93	104.326	1580.73	56.1905					1146.53	40.4645	1764.09	86.8313	1639.56	280.475	1639.56	280.475			624	15	639.3	116.4	300.17	38.1277	1856.03	64.3638	2008.81	48.3746
1711.49	242.786	1525.56	130.21			1467.51	172.796	1793.3	84.4281	1583.97	161.434					1158.88	93.9551	1810.64	89.1131	1660.19	267.524	1660.19	267.524			624	30	651.8	19.2	347.886	18.017	1862.06	68.0999	2008.96	37.5734
1722.05	179.903	1527.57	340.442			1477.81	302.466	1794.32	51.4559	1633.87	147.329					1160.22	53.0575	1844.15	196.819	1664.82	138.852	1664.82	138.852			625	23	682.3	15.6	390.371	29.3939	1888.24	102.113	2013.24	69.945
1747.37	216.773	1544.11	141.824			1485.49	174.486	1800.7	62.3778	1662.37	126.719					1160.9	57.5078	1845.28	117.939	1678	114.802	1678	114.802			626	32	735	20.2	428.463	8.29068	1897.35	110.927	2018.98	79.126
1748.56	144.037	1562.02	300.447			1501.07	107.717	1806.21	78.7666	1663.99	133.595					1162.23	45.9925	1845.62	334.292	1697.69	219.268	1697.69	219.268			626	32	736.7	24.8	436.28	22.9484	1946.52	72.2133	2022.85	66.1052
1763.66	103.964	1625.1	139.228			1511.08	162.299	1839.05	40.0088	1689.71	162.265					1170.23	77.7716	1875.59	60.8229	1720.12	134.353	1720.12	134.353			627	30	1018	62.6	440.328	44.9463	1948.11	65.9649	2029.1	93.8216
1775.34	99.7686	1626.59	191.724			1513.54	132.238	1891.87	112.52	1691.89	49.8591					1180.92	159.236	1879.58	100.206	1727.84	125.343	1727.84	125.343			629	22	780.4	75.2	454.431	32.9966	2012.38	94.7424	2053.31	57.7328
1811.74	135.581	1640.89	81.8125			1550.73	136.254	1893.94	104.208	1720.72	133.61					1182.8	38.0943	1886.14	68.6846	1728.45	118.061	1728.45	118.061			630	25	792.1	31.4	462.005	33.2596	2019.57	62.917	2060.38	56.374
1977.22	145.889	1658.82	208.333			1571.78	268.938	1894.38	96.5894	1724.01	46.2018					1183.03	57.0418	1896.05	100.448	1731.01	158.297	1731.01	158.297			631	35	833.9	22	466.237	46.0573	2033.4	68.3512	2073.01	74.0934
1991.89	250.474	1680.97	320.391			1573.12	97.9898	1964.01	45.9352	1728.34	65.1148					1184.89	103.114	1916.98	65.8846	1743.21	164.859	1743.21	164.859			631	26	918.3	18.4	468.105	14.9	2111.43	94.2934	2083.04	107.872
2013.07	77.5255	1685.71	72.8759			1626.25	268.291	1968.96	56.2523	1747.97	38.8446					1188.87	114.348	1935.06	156.171	1784.02	205.412	1784.02	205.412			632	21	937.3	27.8	472.035	27.8563	2153.75	75.0166	2090.68	151.719
2386.27	108.975	1694.21	162.978			1630.68	282.254	1973.43	96.0924	1749.12	59.6974					1222.26	283.084	1939.88	170.725	1811.5	151.777	1811.5	151.777			633	22	895.7	38.4	472.281	23.3163	2473.37	118.017	2097.15	74.5839
2465.94	92.5591	1697.91	140.172			1639	119.273	1982.37	82.6753	1761.11	84.6822					1225.66	316.797	1943.37	342.701	1843.51	123.686	1843.51	123.686			637	16	996.6	16.4	474.324	24.9683	2640.79	99.8049	2150.42	95.8428
		1706.45	131.215			1640.91	162.378	1984.49	88.3158	1770.44	143.946					1231.55	245.984	1959.49	146.988	1847.68	95.9023	1847.68	95.9023			637	20	987	27	475.062	9.15959	2712.4	89.1292	2152.13	117.75
		1707.74	257.005			1646.53	163.547	1987.04	146.109	1798.46	90.0901					1233.65	92.9836	1977.77	82.7663	1855.2	304.692	1855.2	304.692			638	28	980	28	478.006	17.8757	2717.27	187.456	2184.5	125.713
		1723.98	150.676			1666.2	130.275	2002.14	191.511	1800.67	108.973					1242.3	86.7721	1982.38	98.7008	1864.46	204.104	1864.46	204.104			639	41	1006.3	12.6	484.547	27.8204	2747.24	69.5182	2187.79	83.683
		1738.36	107.722			1701.44	104.039	2021.17	54.8277	1833.76	72.8295					1251.19	147.841	2012.98	62.1438	1875.34	106.14	1875.34	106.14			644	38	1018.4	306.6	486.123	50.009	2904.2	60.6632	2264.35	116.263
		1750.03	265.596			1702.78	203.8	2024.8	83.3161	1833.9	227.066					1266.64	156.474	2055.08	56.1995	1899.32	108.657	1899.32	108.657			647	44	1022.1	121.6	486.909	21.8542	28.1094	6.53314	2265.88	70.9154
		1781.06	159.748			1719.59	172.223	2031.14	163.405	1841.75	94.5083					1275.46	89.6505	2063.7	208.095	1926.42	130.035	1926.42	130.035			647	30	1024.1	43	507.284	21.4649	29.4516	5.16375	2283.13	77.1215
		1784.5	166.349			1722.81	194.323	2097.78	109.891	1853.37	86.4461					1278.37	143.258	2065.79	150.643	1933.46	137.408	1933.46	137.408			647	20	1026.3	36.8	508.869	46.3861	85.7371	4.61818	2374.47	95.0228
		1791.17	151.08			1725.67	126.815	2128.33	45.578	1929.32	258.618					1341.72	70.1004	2081.81	54.6604	1955.81	114.607	1955.81	114.607			650	21	1029.2	92	519.759	9.98715	146.21	16.7534	2393.53	126.063
		1869.42	57.5204			1751.78	129.609	2166.1	138.48	1938.46	163.901					1351.77	232.802	2104.77	149.953	1958.48	99.7596	1958.48	99.7596			651	41	1032.8	36	520.594	14.8038	178.096	8.13199	2528.61	142.866
		1875.25	62.6171			1777.06	153.08	2223.58	55.8095	1941.61	60.8926					1363.5	92.1676	2185.46	74.2862	1961.69	191.912	1961.69	191.912			651	33	1035	31.2	520.76	10.1057	229.411	8.58855	2632.15	50.8648
		1913.42	93.4079			1791.63	123.818	2242.39	99.6088	1944.69	140.102					1364.14	67.3718	2360.06	88.4345	1982.88	163.883	1982.88	163.883			652	38	1035.8	13.4	521.915	21.7584	245.784	16.1506	2632.18	96.5662
		1916.52	136.013			1796.62	128.61	2308.5	57.0206	1959.65	52.4801					1375.1	94.8964	2460.37	117.662	1988.48	131.259	1988.48	131.259			652	22	1040.2	168.6	522.358	14.6512	260.348	4.1949	2675.22	127.67
		1934.57	205.611			1803.29	161.282	2451.36	77.7801	1983.36	109.541					1432.18	102.289	2664.59	42.7046	2006.09	98.4643	2006.09	98.4643			652	25	1045	124.2	524.157	12.384	264.88	5.77264	2715.72	99.5139
		1963.98	136.517			1813.11	144.603	2497.22	43.5762	2012.31	110.994					1433.72	72.9243	2710.06	84.2966	2039.3	111.505	2039.3	111.505			653	33	1047.8	51.6	527.409	22.0795	266.722	5.9712	2734.26	200.77
		1969.6	136.575			1827.03	110.423	2510.56	55.9997	2066.83	63.8937					1434.37	94.5947	2711.98	82.7601	2047.09	126.669	2047.09	126.669			657	28	1049.8	50	528.468	11.5684	267.933	9.05117	2769.9	54.9505
		1981.21	87.3226			1831.7	181.624	2650.8	91.6471	2072.65	73.0371					1452.92	129.785			2078.79	114.931	2078.79	114.931			659	35	1050.1	50	531.441	18.6706	278.78	9.72176	2778.76	64.2865
		1985.5	73.1317			1835.14	119.468	2672.72	65.5445	2087.68	80.3302					1453.81	118.915			2082.92	87.7534	2082.92	87.7534			659	24	1051.3	63.2	531.625	10.2059	280.471	9.30106	2816.41	100.874
		1987.83	143.938			1858.12	236.077	2735.08	60.7903	2112.66	134.253					1458.35	88.0978			2149.38	146.897	2149.38	146.897			661	18	1056.1	36.4	532.997	16.1652	298.393	8.38436	3150.02	43.0778
		1992.69	58.4217			1859.69	230.335	2738	45.4603	2160.88	84.6989					1484.92	146.748			2741.84	147.749	2741.84	147.749			666	38	1062.5	64	533.779	14.7536	304.761	17.7764	162.463	8.01017
		2015.3	96.6547			1880.61	118.963	2750.74	68.0119	2484.52	83.0521					1494.43	75.5425					26.2019	4.84907			667	25	1065	79.4	534.695	36.0212	324.777	38.5931	198.468	11.0464
		2031.61	147.283			1931.07	167.415	2757.83	54.3997	2511.61	104.292					1503.29	247.282					26.5879	4.85778			668	16	1088.4	53	536.642	11.843	330.87	16.8474	230.912	5.90798
		2038.87	215.231			1966.72	92.9478			2581	58.4537					1510.94	280.587					26.6012	3.9646			668	12	1108.3	145.8	540.355	10.6775	335.711	64.4125	237.479	9.35449
		2061.59	98.4378			1979.29	124.053			2696.07	48.5303					1523.86	123.759					27.2566	4.55717			672	16	1116.9	70.6	540.828	10.7903	378.465	40.1486	239.761	9.07994
		2066.23	67.7578			2004.93	127.07			2733.11	41.0454					1542.29	158.446					27.3541	2.30042			673	41	1119	62	551.849	15.1262	429.699	10.8265	243.241	13.3617
		2100.45	82.9219			2023.02	154.211			3290	47.4978					1574.81	123.005					27.5452	3.085			676	42	1132.9	21	554.843	18.7136	444.927	34.6024	243.6	9.76923
		2184.45	100.628			2038.4	115.528									1608.34	113.499					27.9369	2.04072			676	48	1146	48.2	560.837	11.3872	456.212	9.29546	244.435	7.61999
		2685.74	116.421			2076.79	135.627									1625.12	240.217					27.9577	2.46761			678	21	1148.9	60	561.583	10.7563	460.195	20.0938	247.143	12.616
		2952.99	256.434			2087.54	117.811									1629.99	105.789					28.2742	2.86555			681	21	1149.3	40	564.288	25.7181	464.682	13.4243	251.349	11.9773
		3290.7	90.2659			2101.4	125.681									1647.78	95.287					28.5955	4.41463			682	30	1163.9	105.6	581.109	24.7837	469.702	46.4367	252.106	17.096
						2466.16	105.565									1648.61	153.205					28.6281	5.34849			683	20	1170.2	22.4	592.957	42.6012	470.27	11.2207	252.458	8.39628
						2556.31	104.005									1674.93	194.136					28.6379	2.51292			684	42	1176.4	33.6	614.808	17.9439	470.398	9.7412	253.103	10.204
						2588.28	189.398									1690.48	181.666					28.8063	2.90722			685	35	1179.7	62.4	621.524	28.9142	470.708	11.4733	253.39	19.1083
						2769.5	143.791									1717.83	187.66					28.8417	3.98066			688	30	1186.1	29.4	622.376	15.8998	471.729	32.1108	257.14	9.89502
																1719.29	215.945					28.9785	4.09625			688	46	1187.4	100.8	622.961	28.6215	472.077	10.6804	257.419	28.2277
																1722.37	226.356					28.982	3.70541			693	29	1193	100	623.559	35.6611	472.455	9.68045	257.974	13.1424
																1733.39	101.329					29.2727	2.19591			695	37	1194.3	37	635.74	31.3597	473.443	11.0737	258.885	12.6235
																1749.83	88.6204					29.4351	3.18841			695	17	1198.6	42.2	642.142	22.3698	473.578	32.0695	266.438	15.2196
																1758.13	79.3613					29.4881	1.88035			696	12	1205.9	37.2	644.676	17.3004	477.218	19.8529	267.913	15.3219
																1765.24	131.318					29.7532	4.03995			698	21	1215.3	58.8	650.629	24.2599	477.634	8.1681	268.102	11.0652
																1773.82	153.813					29.7537	2.49357			709	17	1238.5	44.4	656.076	27.5718	477.754	9.66175	278.027	17.5842
																1784.89	223.313					29.7893	3.26372			709	22	1244.4	42	671.597	17.3481	477.99	14.6723	279.177	28.8242
																1813.64	57.914					29.7948	4.68405			712	21	1260.8	51.8	678.91	25.2598	478.499	18.968	287.828	31.7922
																1837.06	91.2048					30.3202	2.36486			713	40	1272.2	39.4	698.903	17.2211	478.611	39.9491	291.068	28.9118
																1839.78	150.248					30.4867	5.61029			713	14	1364.8	92	773.358	30.6084	488.537	21.0305	312.46	13.6578
																1863.97	131.812					32.4158	5.59081			715	21	1400.2	29.8	801.494	28.6396	503.491	27.0279	316.283	11.0146
																1897.79	98.4178					33.2366	6.40696			726	51	1458.1	31.2	880.009	172.095	518.782	7.55741	333.479	29.8334
																1917.25	146.636					34.1068	4.50729			741	36	1551	21.6	931.542	17.3473	519.367	45.5143	333.498	8.22823
																1921.96	163.842					39.3908	5.76932			747	41	1889.1	16	942.615	43.6717	528.391	7.6592	363.78	46.0025
																1939.98	84.8837					81.0318	7.7011			747	31	1985.5	27.8	969.637	35.4694	530.269	19.9184	405.066	15.9225
																1945.07	145.268					221.334	25.4478			752	39	2090.2	30.4	973.326	36.6785	531.473	13.1719	416.301	37.0861
																1956.15	83.6242					246.336	8.48294			756	36	2103.2	16	1015.63	104.275	532.311	10.7584	423.495	29.8946
																1979.11	89.0526					256.577	15.7014			762	51	2114.1	18.4	1029.26	48.6346	535.583	16.8755	444.306	62.289
																1982.99	321.447					263.179	15.1456			782	42	2131.8	16.8	1042.42	42.3839	536.089	9.79921	446.229	18.4194
																1984.6	81.5368					272.13	13.4905			792	26	2439.2	13.2	1045.25	66.5665	539.679	9.77302	450.838	34.3652
																1994.63	130.281					284.228	25.3828			815	38	2625.6	22	1047.71	49.6674	539.83	8.49982	451.706	15.2838
																1998.82	338.489					293.119	50.5499			838	22	2625.9	14.8	1065.38	154.567	540.007	22.4955	459.906	25.0055
																2003.04	128.472					294.547	22.5847			854	33			1082.6	89.5974	542.508	34.6384	463.282	32.2697
																2027.22	90.9956					338.79	44.4736			859	27			1082.75	85.628	544.846	15.3521	475.329	36.3157
																2067.68	93.0887					347.02	42.0005			891	53			1090.71	90.5806	546.003	11.838	495.844	12.4922
																2087.06	114.78					361.486	53.3216			907	36			1099.08	60.0534	553.273	14.8508	499.8	27.7536
																2088.6	80.6286					371.506	23.8279			924	30			1123.19	126.972	554.251	7.52723	500.931	22.7813
																2090.77	63.9066					376.544	11.7833			939	58			1139.66	40.9206	562.668	42.4622	501.801	20.5636
																2093.14	57.8347					377.426	33.6239			948	59			1202.22	40.2677	563.675	84.8516	503.785	27.7288
																2105.4	60.7824					378.428	56.9388			955	33			1255.06	117.782	564.517	6.48621	504.652	65.1285
																2147.26	92.7848					423.542	49.4417			958	46			1319.31	62.8128	565.981	11.6973	506.137	27.8494
																2151.92	262.869					427.411	32.1231			975	44			1347.88	168.215	566.414	15.2496	507.971	22.6103
																2186.68	126.194					429.006	54.3495			992	43			1439.1	91.1472	581.223	48.59	508.183	18.7862
																2188.06	73.2581					430.758	22.0944			992	49			1463.35	116.728	584.869	13.1618	509.041	40.7117
																2224.91	104.122					431.775	14.4962			993	32			1560.72	40.1503	589.111	17.0563	510.132	49.802
																2245.99	77.9059					435.584	54.889			1015	45			1760.8	169.02	591.18	7.43321	510.263	24.1567
																2369.93	213.943					436.14	28.0419			1034	67			1762	73.5011	594.342	14.3301	512.352	39.832
																2394.3	136.947					436.312	16.9844			1039	32			1762.78	150.376	595.625	12.712	512.654	30.1553
																2403.4	88.2838					442.41	19.061			1063	121			1814.43	135.912	596.711	10.8334	514.066	20.0133
																2551.9	86.7096					445.261	37.5825			1093	30			1817.62	191.115	597.271	17.3401	516.384	31.5704
																2564.12	65.344					448.068	44.4525			1120	77			1880.42	87.5752	597.714	15.2907	519.18	35.6842
																2579.2	78.3186					449.152	49.2718			1127	60			1902.97	51.7521	599.412	26.4913	520.097	32.7029
																2651.96	168.684					449.789	13.9003			1161	52			1915.52	57.8297	601.508	8.93862	520.932	17.7121
																2875.6	76.4289					450.766	24.3088			1163	39			1971.73	35.7688	606.315	10.2563	521.474	21.0059
																3309.38	118.427					451.282	35.2986			1165	98			1974.07	43.4795	610.213	9.46926	521.751	23.2729
																						452.836	23.3099			1208	196			2087.12	60.5095	615.098	14.901	522.159	39.1454
																						455.218	20.8806			1208	78			2125	63.4111	616.508	13.9866	522.474	17.1674
																						459.057	29.7302			1218	57			2164.47	48.1345	620.747	13.3399	523.134	17.8266
																						459.508	38.961			1222	59			2166.67	47.4278	622.643	16.9101	523.432	16.0768
																						460.693	70.2863			1241	85			2188.71	50.0942	625.345	12.0976	524.841	18.6114
																						462.128	31.4521			1243	47			2360.8	75.4772	628.621	17.6696	525.264	31.3076
																						462.644	28.5304			1255	74			2640.23	49.1504	630.475	7.82669	525.475	32.715
																						463.83	20.6897			1263	35			3075.27	39.9465	631.707	10.6655	532.119	52.4389
																						464.927	30.0562			1272	70			437.906	10.6688	632.126	7.91151	532.27	23.718
																						467.7	33.1579			1275	54			443.019	25.6884	639.938	15.8606	532.4	45.6484
																						468.71	29.1163			1282	73			447.895	8.6538	642.536	12.3804	533.93	40.3413
																						469.439	75.7202			1289	37			459.536	21.556	650.63	9.7785	535.82	24.4367
																						469.574	32.1428			1293	46			460.688	16.095	666.83	10.5985	536.76	45.6809
																						469.587	18.7119			1313	57			460.719	14.5842	670.004	29.5361	537.07	28.0881
																						470.324	23.1118			1347	70			462.539	8.92671	670.286	26.1813	537.239	16.6172
																						472.583	40.3479			1375	33			465.244	12.119	674.143	8.17745	537.416	19.5326
																						472.803	29.6711			1381	37			465.344	20.2026	677.724	37.2149	540.276	21.747
																						472.828	16.7273			1382	65			468.981	9.04655	688.468	16.437	543.661	35.0408
																						472.893	17.3029			1389	43			469.487	10.8672	786.304	12.7727	547.961	42.4251
																						474.013	58.8026			1402	39			469.999	22.3918	822.458	51.0675	547.999	21.7402
																						475.287	17.0554			1407	48			470.367	17.6003	888.771	15.8403	548.418	26.8317
																						475.983	44.1609			1436	112			470.441	15.1531	902.476	32.2618	551.261	15.3883
																						476.37	27.5425			1444	47			471.603	11.9149	917.396	37.29	555.968	17.4593
																						476.522	59.5671			1455	48			472.65	15.3128	935.495	15.802	558.256	18.6863
																						476.701	57.6132			1485	34			472.753	9.1167	957.674	24.8632	562.23	54.9297
																						477.355	47.0302			1496	47			473.873	28.4177	957.855	33.5638	565.209	16.4917
																						477.426	28.634			1503	53			475.432	20.5329	981.581	18.0906	565.295	17.0032
																						478.076	45.1253			1515	50			475.814	9.17356	985.214	31.3973	567.143	42.7065
																						479.174	16.5336			1524	68			475.987	9.45209	1007.87	57.2	569.679	22.8882
																						479.3	20.1881			1544	39			479.893	10.2667	1011.01	53.2544	569.86	19.3614
																						479.946	50.2173			1573	65			480.572	21.4877	1016.9	146.989	572.303	23.4224
																						480.216	26.9797			1578	51			480.902	9.26804	1017.95	33.4274	574.499	40.5761
																						480.221	55.0759			1613	55			482.433	24.6357	1018.53	26.5694	574.582	24.9656
																						481.045	24.8552			1616	42			484.66	10.4583	1022.32	40.1529	575.191	18.4029
																						481.057	30.1613			1634	100			484.73	9.33908	1023.27	56.7745	575.547	25.023
																						481.435	36.7422			1694	42			484.969	27.9371	1024.94	79.3899	575.96	28.2847
																						482.239	50.144			1708	33			487.659	9.3934	1025.02	12.5863	577.557	48.369
																						483.611	19.2806			1708	48			492.437	9.48197	1027.43	111.156	578.406	20.6907
																						483.811	23.2141			1718	51			492.609	12.5204	1032.14	149.212	579.239	22.4594
																						484.62	52.5266			1721	77			502.005	17.1932	1034.11	29.0282	583.138	74.4673
																						485.559	27.4736			1746	45			503.683	17.0547	1034.15	132.316	583.378	21.7033
																						486.618	46.899			1755	58			513.909	16.597	1034.42	33.2808	584.835	48.8392
																						487.598	30.7615			1800	55			515.447	21.8957	1034.79	77.0104	585.021	17.5444
																						487.711	42.9083			1810	54			517.889	22.5925	1035.84	21.5254	585.309	41.1044
																						487.876	35.6381			1823	55			521.026	10.0105	1036.09	189.251	588.846	41.3517
																						487.902	37.5508			1844	38			527.385	17.0147	1037.17	241.761	589.442	18.4518
																						487.962	19.9191			1853	68			530.165	10.7897	1040.12	55.9769	589.824	17.3121
																						490.308	30.842			1857	28			541.599	10.3894	1040.89	92.7372	590.631	20.5952
																						490.595	56.7725			1875	76			546.28	10.4755	1041.08	93.646	591.301	73.9441
																						491.659	41.1491			1876	39			547.651	69.7251	1041.15	59.5448	592.314	20.4764
																						492.112	39.862			1879	42			550.315	23.4206	1045.34	45.698	593.88	74.827
																						493.296	37.9922			1883	61			552.368	23.2921	1047.96	24.0952	593.965	20.0252
																						494.239	39.9253			1907	29			554.881	23.9252	1054.21	44.363	595.429	22.2113
																						494.249	20.6614			1914	46			570.015	40.8065	1056.13	118.432	596.874	26.305
																						494.531	31.2851			1918	31			586.437	24.1038	1056.72	30.4103	597.723	21.1181
																						495.083	62.9103			1954	30			592.985	12.8036	1057.63	16.9383	600.792	25.4068
																						495.203	16.2576			1983	32			598.538	25.7217	1058.04	71.674	601.571	33.0139
																						495.708	61.6454			1992	57			617.794	13.4318	1060.24	46.5257	604.867	20.4374
																						498.121	71.668			2010	54			619.423	16.6548	1066.72	134.681	606.488	21.8801
																						498.307	38.6721			2025	27			622.095	11.8604	1076.97	38.8105	607.708	18.511
																						498.742	55.3606			2027	43			625.384	24.9131	1089.35	155.88	607.836	33.1073
																						499.427	59.0335			2028	29			627.8	58.9828	1100.4	74.8868	609.559	39.3855
																						500.879	16.4018			2034	62			643.582	12.25	1104.26	54.3976	610.054	22.4174
																						501.159	21.2545			2054	43			774.825	21.4641	1110.63	71.2889	611.042	23.6943
																						502.301	27.4347			2055	63			788.192	20.18	1130.81	78.6534	611.491	15.481
																						503.483	27.7485			2057	68			791.002	17.5678	1172.42	300.174	613.927	18.3636
																						504.284	33.204			2057	75			957.128	85.5707	1181.37	43.6728	617.689	43.2105
																						504.355	32.5206			2062	35			958.278	30.4536	1182.05	56.6439	617.868	58.3549
																						504.989	47.0926			2064	38			988.255	68.0244	1188.72	60.6628	618.935	30.9421
																						506.407	34.1958			2066	33			988.43	154.306	1190.16	11.6842	622.463	19.3721
																						507.744	18.8323			2068	67			999.998	57.3796	1190.85	43.1928	626.198	19.9609
																						507.99	39.0367			2074	61			1018.58	95.1253	1195.01	220.14	629.924	21.3345
																						512.606	24.42			2076	63			1019.17	79.412	1196.52	83.5931	630.208	40.7495
																						513.144	39.0218			2086	44			1025.87	63.9397	1209.79	20.8831	631.593	25.9953
																						514	52.2373			2092	63			1032.88	51.4499	1211.72	54.8287	632.335	65.8649
																						515.839	66.7971			2098	40			1034.07	72.1161	1219.15	73.3795	632.398	29.818
																						517.983	15.2786			2130	44			1055.24	40.7317	1221.51	42.7761	635.57	56.0033
																						518.473	24.114			2130	44			1059.96	78.1697	1223.15	61.9777	639.403	65.4455
																						518.628	54.9385			2150	46			1075.93	88.4009	1232.66	361.104	641.086	19.4358
																						518.736	52.7439			2158	41			1085.61	52.687	1262.58	18.0833	641.164	18.294
																						519.546	67.5657			2189	58			1089.8	45.1732	1360.18	21.4429	642.828	28.5105
																						521.713	23.2205			2247	67			1120.52	53.7232	1385.92	142.658	644.827	38.4474
																						525.011	37.7742			2430	75			1123.36	118.055	1412.57	20.8988	648.611	22.8678
																						525.023	51.1606			2592	30			1128.44	86.8557	1443.57	19.4927	654.817	20.6967
																						525.22	39.8642			2603	30			1147.05	165.236	1466.51	59.5908	655.166	23.2995
																						530.725	34.2623			2638	44			1183.14	74.8062	1540.54	84.5672	665.031	52.1876
																						530.902	27.9788			2642	51			1191.36	61.205	1564.66	27.0588	668.074	86.9307
																						531.356	72.5285			2676	89			1196.25	94.3388	1572.61	43.976	683.09	27.6501
																						532.086	16.6023			2719	45			1217.69	76.699	1593.38	163.593	683.979	80.4377
																						532.23	37.6311							1219.44	81.8247	1731.43	84.9695	689.565	45.1863
																						534.118	16.6885							1225.39	50.7047	1741.53	38.5455	691.567	16.5822
																						534.415	30.7485							1244.64	66.9983	1766.94	27.7012	709.355	43.1212
																						534.582	31.2801							1347.1	79.9761	1797.57	38.7311	717.065	37.4392
																						534.953	23.7002							1819.71	53.3865	1804.98	15.9271	729.225	65.8411
																						535.038	22.8161							1871.27	50.8723	1822.01	15.305	736.912	28.3064
																						536.175	37.2867							2035.14	37.559	1838.85	41.6477	745.216	25.5009
																						538.017	34.2907							2052.79	49.4526	1881.78	25.8552	751.233	92.9569
																						540.125	60.1178							2055.53	35.3076	1887.82	19.3053	751.545	36.3003
																						540.35	14.5719							2058.65	79.1025	1894.83	28.655	775.568	28.8765
																						540.57	33.7436							2091.01	84.4049	1926.65	6.8697	777.922	29.9324
																						540.854	49.3889							2116.6	52.9437	2023.82	4.32165	786.449	39.2161
																						540.889	73.2337							2132.23	91.7485	2107.31	10.2868	789.665	28.8415
																						541.474	30.6281							2169.46	88.9977	2178.24	11.0692	821.69	42.7162
																						542.613	37.8094							2190.62	76.5188	2194.75	14.2076	824.74	61.6615
																						543.919	12.8805							2252.56	66.7437	2700.8	11.6101	832.19	56.5522
																						544.204	102.217							2794.21	36.9906	2720.56	28.7445	843.583	32.8252
																						544.424	16.9877							432.565	58.2377			856.748	86.9654
																						544.48	33.384							447.072	21.0778			861.736	37.1244
																						547.4	36.165							455.679	56.8415			867.278	31.7953
																						548.339	23.8056							459.647	8.87286			869.649	49.7011
																						549.251	88.9884							460.498	8.8887			872.78	33.3879
																						549.975	62.3539							460.722	8.89287			880.889	53.415
																						550.048	28.5258							466.137	11.4219			883.77	30.4152
																						552.439	29.6043							469.912	19.578			895.519	28.834
																						554.035	33.0176							474.297	13.4437			899.365	55.3484
																						554.534	19.3211							478.97	9.23218			904.985	98.3827
																						555.987	56.2622							479.019	11.5414			913.364	43.0399
																						558.606	35.8949							481.379	32.562			918.632	48.2765
																						559.981	16.9467							482.216	9.29243			921.801	35.5753
																						559.995	36.984							483.117	20.4802			931.255	94.0813
																						560.715	23.2267							486.779	9.37709			941.386	113.595
																						562.44	83.3479							487.379	9.85763			943.963	35.3562
																						566.33	27.5469							489.843	12.9245			945.397	33.9776
																						567.66	53.2434							506.33	9.73912			962.965	29.4971
																						575.635	34.4167							508.368	18.6737			971.214	48.7849
																						575.666	16.8874							509.079	63.733			972.034	51.3846
																						576.759	90.8542							522.933	11.653			974.118	18.8983
																						581.615	20.7912							531.474	10.2031			977.175	26.2895
																						591.891	21.935							533.87	10.2472			978.07	42.1672
																						598.255	80.1707							534.107	10.2516			978.898	38.9546
																						599.425	28.3881							535.428	10.5842			984.195	80.0383
																						603.322	19.2474							536.472	15.9574			984.63	32.1884
																						605.105	19.9635							537.581	10.3155			984.86	46.1503
																						605.604	29.2702							542.334	14.8762			987.763	50.7473
																						605.822	48.6022							544.917	10.4504			987.885	33.7053
																						614.144	52.1725							546.104	10.4723			989.114	52.5739
																						617.08	23.7965							558.194	10.6942			990.137	47.4701
																						617.938	62.5749							568.361	15.5592			992.825	51.5979
																						622.616	38.2522							569.33	36.7272			1002.2	70.1162
																						623.515	20.5457							582.104	11.1319			1008.35	86.3706
																						626.175	17.7678							605.568	11.7911			1009.16	80.9296
																						628.185	21.9047							617.17	33.5473			1009.5	76.7388
																						631.406	74.1983							620.055	23.6467			1009.51	209.046
																						640.631	30.4061							620.633	11.8339			1013.9	280.674
																						641.043	21.2751							621.392	12.5585			1021.22	179.436
																						641.305	59.8482							635.947	20.711			1034.49	61.1032
																						644.067	38.6448							646.059	12.2948			1037.67	86.8196
																						646.338	75.3878							646.69	23.628			1039.63	72.3037
																						647.813	36.8838							673.291	12.7865			1040.25	107.77
																						650.784	46.1125							676.312	18.1057			1042.05	111.826
																						651.261	73.3626							687.676	24.5253			1053.24	56.4582
																						656.109	26.0734							726.113	13.7342			1055.38	66.4876
																						658.134	40.9212							728.499	13.7769			1055.94	93.7201
																						672.093	57.7643							732.102	13.8412			1059.18	61.3719
																						673.168	31.0198							739.246	16.064			1061.08	218.735
																						675.558	40.5825							776.623	140.046			1062.22	97.6691
																						676.067	37.1192							778.903	14.6737			1064.41	98.6409
																						680.491	33.8535							806.936	17.7483			1066.32	78.6125
																						680.537	79.2178							810.23	62.1291			1069.44	110.643
																						688.581	48.2867							858.124	22.6576			1072.14	135.024
																						689.017	87.9589							916.102	59.9502			1073.02	119.31
																						690.746	41.7072							923.284	17.2043			1078.68	192.446
																						697.587	59.5027							980.32	118.665			1089.41	59
																						758.368	42.9402							994.615	93.1241			1103.17	77.3964
																						775.702	31.5013							996.745	140.217			1108.63	140.073
																						795.499	104.196							1002.91	99.6067			1110.12	64.4102
																						894.766	108.521							1006.5	122.512			1114.34	227.351
																						907.378	144.035							1012.08	70.6191			1117.91	137.269
																						929.597	134.65							1019.6	98.4467			1122.13	126.597
																						936.915	166.108							1028.12	95.5513			1123.1	64.02
																						959.243	145.655							1033.16	89.3263			1130.63	137.909
																						978.675	144.287							1034.25	40.4313			1131.33	98.7608
																						981.512	174.584							1035.74	85.6559			1142.89	88.0005
																						982.279	128.799							1043.26	41.9873			1148.06	64.509
																						983.908	93.6527							1045.61	117.424			1170.84	70.8746
																						993.072	242.694							1046.89	89.716			1172.59	78.7205
																						999.821	124.91							1061.6	40.2551			1177.36	94.7589
																						1007.15	59.9976							1071.59	113.494			1186.31	117.59
																						1010.36	103.22							1071.76	79.6052			1186.84	144.544
																						1012.07	239.647							1075.18	77.1866			1186.98	145.661
																						1014.13	102.818							1085.3	64.8894			1215.43	111.773
																						1016.26	78.8187							1087.03	61.3785			1225.79	116.7
																						1017.21	243.998							1095.22	313.885			1238.35	133.285
																						1018.09	149.543							1102.91	101.663			1247.9	73.1151
																						1025.47	141.989							1118.11	407.789			1262.62	110.918
																						1028.05	152.702							1156.03	129.021			1362.06	92.5628
																						1028.81	197.161							1170.62	82.8775			1362.76	90.8654
																						1031.55	77.4651							1172.88	169.11			1423.95	47.564
																						1034.23	84.2094							1231.84	82.0367			1435.91	78.0527
																						1043.17	264.9							1241.81	61.9502			1437.43	67.1236
																						1044.55	80.7718							1438.81	59.1606			1439.67	90.8704
																						1047.98	171.455							1491.09	73.1411			1442.87	58.4105
																						1049.21	167.471							1525.5	58.4376			1481.66	58.6967
																						1068.49	185.479							1598.99	117.66			1490.11	109.149
																						1074.07	148.109							1774.23	45.6316			1510.18	121.411
																						1083.55	168.388							1779.65	46.3417			1534.56	101.694
																						1091.7	144.742							1840.29	111.561			1558.03	83.9367
																						1091.76	231.435							1976.99	70.1935			1560.15	236.855
																						1093.02	216.83							2185.34	44.7144			1565.71	154.044
																						1111.06	276.713							2312.99	99.6098			1567.56	51.862
																						1117	184.844							248.546	32.1837			1573.45	80.9651
																						1122.41	350.282							391.04	7.58833			1628.21	179.721
																						1127.39	113.395							398.636	18.4003			1632.94	123.387
																						1133.41	87.7268							459.69	23.7814			1670.23	106.369
																						1142.33	128.545							462.577	22.8542			1716.96	63.7156
																						1167.65	102.178							465.112	13.6414			1727.58	61.3278
																						1171.44	117.165							469.394	32.5953			1758.23	111.898
																						1176.24	194.913							472.221	11.0192			1770.62	255.123
																						1176.5	76.8897							472.617	20.8714			1789.83	45.9688
																						1178.37	157.602							490.023	17.2701			1887.3	70.6211
																						1188	145.64							497.809	10.1564			1888.11	135.327
																						1192.58	277.794							500.757	38.4479			1891.45	38.7811
																						1200.27	134.143							501.866	14.5814			1903.91	76.6879
																						1215.88	291.916							505.216	32.3627			1905.82	226.271
																						1216.56	92.8612							508.392	20.2389			1926.24	146.116
																						1216.9	199.553							510.948	34.8769			1942.81	95.8132
																						1224.83	138.612							511.427	14.3566			1968.74	153.565
																						1251.39	224.467							512.609	10.6436			1969.01	97.776
																						1272.91	107.583							513.975	32.9018			1977.45	59.3808
																						1286.32	212.442							521.176	14.2189			1992.77	86.6784
																						1316.33	241.947							524.658	23.4806			1997.64	81.6846
																						1332.36	78.7411							524.728	23.3828			1999.59	109.237
																						1335.34	236.904							525.346	18.566			2005.5	191.555
																						1337.98	89.9098							525.554	13.526			2071.82	50.0122
																						1379.51	113.08							531.021	31.9097			2084.68	52.5292
																						1384.71	142.692							531.673	18.066			2087.58	41.9842
																						1413.88	118.588							544.752	26.7454			2096.96	67.016
																						1416.07	80.7251							545.482	15.5866			2108.91	88.3566
																						1426.51	210.33							555.24	20.8544			2110.4	59.602
																						1467.62	84.0734							558.365	21.5017			2162.48	96.8737
																						1521.88	88.9412							564.815	26.1737			2218.18	66.9433
																						1534.83	92.9078							594.021	19.2941			2303.56	41.3102
																						1606.51	155.125							598.422	18.9733			2311.33	128.218
																						1636.33	81.5554							600.092	24.0664			2437.84	55.5633
																						1654.93	93.8121							606.7	19.9185			2573.81	147.182
																						1700.74	118.67							614.127	26.5945			2592.88	70.2188
																						1704.57	143.226							619.338	17.4793			2599.74	53.9577
																						1733.72	51.9583							620.084	46.2316			2607.88	84.6566
																						1735.35	105.243							625.488	26.2285			2633.59	57.6096
																						1764.09	86.8313							632.202	12.0438			2710.27	62.1792
																						1810.64	89.1131							634.684	13.5395			3069.37	81.3729
																						1844.15	196.819							634.902	33.497			3124.96	47.4696
																						1845.28	117.939							642.818	23.9829			3470.91	72.1641
																						1845.62	334.292							656.314	33.8214			196.478	16.7494
																						1875.59	60.8229							657.306	15.7476			229.826	8.74869
																						1879.58	100.206							660.89	16.7086			239.405	26.1663
																						1886.14	68.6846							661.891	20.2553			241.583	13.9268
																						1896.05	100.448							666.59	20.8984			242.16	14.9226
																						1916.98	65.8846							678.702	23.3199			244.829	26.6461
																						1935.06	156.171							708.807	13.4246			245.447	12.5836
																						1939.88	170.725							717.886	44.9736			247.397	13.1044
																						1943.37	342.701							758.756	19.0404			247.774	9.0434
																						1959.49	146.988							783.547	17.5597			253.663	10.5503
																						1977.77	82.7663							784.122	35.5866			258.055	10.7168
																						1982.38	98.7008							786.699	27.9944			258.095	17.8212
																						2012.98	62.1438							794.58	83.7281			258.813	11.0122
																						2055.08	56.1995							835.366	46.0703			260.206	10.8724
																						2063.7	208.095							853.456	15.9875			260.496	20.5443
																						2065.79	150.643							855.946	44.4063			262.843	13.296
																						2081.81	54.6604							861.103	22.2475			265.938	20.9554
																						2104.77	149.953							874.629	71.4844			269.665	21.5199
																						2185.46	74.2862							999.088	94.0907			276.254	19.222
																						2360.06	88.4345							1008.47	141.075			307.171	21.9948
																						2460.37	117.662							1018.88	68.4909			311.739	10.7763
																						2664.59	42.7046							1020.99	61.5597			321.28	15.6396
																						2710.06	84.2966							1025.13	68.9286			348.307	41.4231
																						2711.98	82.7601							1032.05	137.914			348.558	10.2747
																						26.462	2.11353							1047.27	44.4729			374.338	29.3382
																						27.579	2.91729							1060.34	46.7106			405.005	40.3309
																						28.8941	4.02651							1084.28	62.3295			407.877	44.1058
																						30.6397	3.07321							1093.92	57.2785			425.593	25.893
																						64.0148	3.39993							1113.91	84.3225			467.414	36.4283
																						76.0472	4.88104							1135.88	90.3789			468.185	15.2603
																						80.7398	3.55943							1144.73	72.7547			474.526	19.7811
																						89.636	15.153							1193.14	79.3601			478.797	15.1999
																						123.155	7.76871							1240.6	49.8051			479.694	20.07
																						128.423	3.89856							1261.16	76.9894			485.588	42.4731
																						147.362	19.8943							1311.95	60.6287			486.31	54.4483
																						153.747	6.66348							1389.65	44.5735			490.419	26.1828
																						168.467	6.60321							1743.04	82.102			493.176	28.7886
																						235.539	13.2849							1745.19	39.2038			496.579	40.4888
																						250.008	16.7622							1855.41	85.3278			497.836	30.2038
																						252.115	17.6758							1865.8	66.0873			501.123	51.2591
																						261.8	10.5845							1935.53	62.6756			507.619	29.7263
																						262.183	15.7935							1965.19	47.0946			507.887	57.0864
																						264.534	14.9513							2018.02	49.2825			508.626	15.5554
																						273.931	21.4321							2052.45	69.936			511.013	19.9073
																						282.961	7.62422							2056.89	63.9111			512.308	39.4924
																						283.849	9.80659							2061.35	35.3088			513.896	13.2941
																						288.544	32.6716							2127.45	50.4669			514.15	20.2364
																						293.902	54.9929							2140.08	63.651			517.321	33.9508
																						311.61	28.1062							2155.9	85.1939			517.355	38.178
																						311.668	29.2849							2163.23	41.1712			517.367	20.4665
																						337.052	13.7078							2313.64	55.2562			520.067	40.8814
																						350.702	18.6361							2654.27	50.7472			521.278	43.9302
																						361.006	23.7894											524.766	70.3288
																						363.308	29.1057											525.14	14.8088
																						384.746	16.4085											525.958	37.9861
																						389.459	20.9985											528.723	25.6233
																						392.007	14.2443											528.847	42.7938
																						392.08	25.5287											529.197	40.6729
																						396.808	71.1315											529.787	27.7469
																						407.263	22.0969											531.455	20.8963
																						411.007	19.0782											535.274	32.5567
																						416.603	26.6299											536.588	18.9397
																						422.272	31.044											537.169	45.2432
																						422.901	31.7339											537.955	35.5364
																						427.896	30.1213											538.661	73.8912
																						428.029	37.3947											539.213	50.6329
																						428.294	17.9259											539.77	35.1325
																						428.773	18.5979											540.259	62.1454
																						433.669	22.2947											540.267	18.5071
																						435.191	34.9518											540.794	31.8058
																						435.43	14.0302											543.755	44.4178
																						436.131	24.4911											544.53	17.0072
																						437.088	28.6362											544.626	18.2726
																						438.414	29.0653											544.705	22.2907
																						440.224	28.6263											544.798	21.4231
																						440.428	26.1958											545.038	17.3725
																						441.093	15.307											546.527	26.7324
																						441.868	38.3273											548.174	24.8564
																						442.833	24.7265											549.797	71.2957
																						443.391	17.1841											550.028	31.7621
																						443.993	23.597											552.299	17.9887
																						444.588	31.5612											554.782	27.1735
																						444.67	30.2446											555.266	34.4798
																						445.293	26.8577											555.629	37.1253
																						445.537	16.9101											558.718	28.6223
																						446.344	31.4949											558.919	25.5687
																						447.132	19.4354											559.381	22.9729
																						447.706	30.3332											560.028	28.0998
																						448.029	37.8853											560.123	32.0592
																						448.238	17.2807											560.171	27.9456
																						450.012	18.3065											561.188	24.6039
																						450.155	23.6094											562.152	27.0385
																						450.871	44.5674											562.675	29.6746
																						451.003	17.5393											562.955	30.853
																						453.449	54.6761											563.35	36.5872
																						454.328	36.8397											563.556	31.1992
																						455.039	30.1075											564.263	33.3193
																						455.484	68.2674											568.285	26.9806
																						455.739	25.4589											568.747	31.1529
																						455.941	17.0461											568.855	26.3672
																						457.89	46.066											569.262	53.7296
																						458.19	29.9605											571.052	29.1284
																						458.322	25.2764											571.888	19.2056
																						458.534	40.075											571.913	54.0157
																						459.133	16.7102											573.029	24.8283
																						461.479	33.2109											573.647	37.2167
																						461.732	26.8737											573.7	11.7636
																						463.175	30.9553											573.707	39.4079
																						464.604	21.4826											574.904	41.0743
																						466.001	22.221											575.005	21.1093
																						467.966	12.7677											575.271	76.0057
																						468.651	23.5336											577.084	29.1929
																						470.775	26.1612											583.157	36.5746
																						472.094	37.1644											583.674	26.5616
																						472.52	15.6374											585.943	33.8225
																						472.627	14.1285											587.313	45.7965
																						473.071	19.4083											587.602	24.1112
																						473.985	76.3502											588.235	22.9002
																						474.759	39.3695											588.441	25.0256
																						474.78	38.4633											588.564	81.874
																						476.752	46.8539											588.833	15.7152
																						478.566	59.1422											591.107	30.6352
																						478.911	44.3984											591.309	50.3164
																						480.944	21.6901											593.672	26.9495
																						481.1	30.8661											597.161	62.6091
																						482.153	35.6176											598.178	34.6396
																						482.638	30.8443											600.022	33.2604
																						483.827	42.8174											604.646	53.024
																						485.147	14.5114											605.927	28.3647
																						486.529	27.0052											606.445	35.6214
																						488.004	56.4947											607.635	48.5765
																						488.24	58.0969											614.788	25.1574
																						488.3	35.6682											616.194	35.8821
																						489.765	25.9499											619.009	60.6612
																						491.067	52.6898											620.613	29.9514
																						491.446	26.9747											620.945	41.7058
																						492.019	42.3708											621.003	71.8995
																						492.125	29.339											622.617	35.5554
																						494.291	78.2677											628.022	23.6646
																						494.967	22.3749											633.331	48.8971
																						495.527	61.7845											633.913	42.0932
																						496.76	45.4386											636.393	22.2063
																						497.309	46.8109											636.64	20.0085
																						498.513	34.0494											638.727	25.2136
																						500.51	17.8753											641.907	31.1581
																						501.334	87.3159											642.833	27.6432
																						502.556	45.1447											643.199	29.5527
																						505.73	25.736											644.884	21.4214
																						506.732	28.295											645.251	22.2675
																						507.698	14.2533											646.629	59.802
																						507.894	15.17											649.015	40.5809
																						510.017	35.6724											654.34	33.4168
																						510.08	23.3815											657.625	24.3124
																						510.161	20.2774											668.092	31.5233
																						512.756	26.1502											683.103	35.9509
																						513.048	45.2496											687.947	48.6731
																						513.788	23.6242											691.533	27.6895
																						513.961	31.3619											699.862	16.903
																						514.821	18.4496											714.995	82.3259
																						516.392	18.7175											736.15	32.0336
																						516.561	22.1163											763.782	36.1839
																						517.702	39.3157											766.521	32.8667
																						520.157	13.8679											769.121	46.3084
																						521.966	27.6242											776.156	74.0056
																						524.449	23.5298											801.752	37.5258
																						527.065	41.1835											803.788	83.8283
																						527.289	49.6554											826.746	71.3548
																						529.268	30.1918											835.643	27.2952
																						529.815	15.9266											844.3	72.642
																						530.025	15.8981											845.874	48.8637
																						532.155	16.5194											858.895	37.6342
																						532.195	31.8439											869.399	52.6656
																						533.574	77.2147											872.189	36.5228
																						534.502	26.6846											880.001	62.7063
																						535.534	24.0406											880.367	23.7956
																						537.002	32.4598											916.745	21.6954
																						538.359	51.0274											917.458	36.0012
																						540.403	12.2574											919.534	41.6605
																						542.736	43.5643											920.274	64.7397
																						543.527	90.1291											923.32	47.8935
																						543.531	26.2058											931.618	77.083
																						543.723	21.348											933.957	43.1524
																						544.609	22.2925											934.285	96.467
																						545.187	24.3722											938.853	50.9449
																						545.363	53.7474											938.977	50.0136
																						545.493	50.7185											943.167	54.3628
																						546.696	31.5944											943.929	63.1098
																						547.481	39.5707											944.276	85.5521
																						550.278	61.2334											953.495	32.3403
																						553.208	31.3657											955.059	76.3807
																						554.887	59.2936											955.206	32.3217
																						555.29	30.1143											955.508	83.6233
																						557.965	42.3303											956.991	29.592
																						559.842	49.2516											958.02	22.7167
																						560.433	39.0654											958.867	34.4097
																						560.53	44.3968											962.531	39.2568
																						563.101	16.9423											963.023	35.4459
																						565.053	32.9608											963.39	59.5248
																						566.584	82.6745											964.92	56.7845
																						566.915	21.72											969.495	62.3519
																						569.458	26.2891											974.331	40.5956
																						570.111	31.1451											976.601	161.829
																						571.793	22.1415											977.458	106.76
																						574.205	63.3846											981.218	52.7939
																						575.593	35.619											983.404	45.3582
																						575.961	68.734											984.408	43.08
																						577.038	35.5471											986.924	30.4716
																						581.193	33.9699											988.848	80.0503
																						582.824	43.3015											992.171	39.2794
																						584.187	29.2614											992.629	86.492
																						586.417	53.4866											994.091	53.413
																						586.835	78.3928											994.576	44.374
																						587.655	24.1098											995.6	89.2128
																						588.546	38.8043											998.004	31.0365
																						588.629	47.2065											1001.59	148.223
																						589.5	63.4874											1004.04	171.504
																						592.443	17.7342											1016.15	80.3662
																						592.962	15.9671											1018.14	66.9278
																						593.758	34.1548											1029.62	139.619
																						595.538	26.7799											1032.29	120.82
																						598.084	52.3082											1037.06	65.1399
																						598.853	22.4197											1041.18	70.0847
																						599.573	37.5798											1042.17	82.3734
																						601.662	25.7034											1047.99	94.0501
																						602.67	80.6307											1048.89	47.9086
																						602.899	28.1203											1068.97	91.2227
																						605.771	24.97											1071.91	76.9355
																						606.969	22.7286											1090.4	55.8871
																						608.944	24.3526											1090.72	93.5336
																						612.106	24.3674											1108.68	50.4855
																						614.432	104.702											1117.95	109.098
																						618.072	21.3214											1127.85	75.4388
																						619.091	55.274											1134.8	177.084
																						619.48	30.6903											1156.07	285.21
																						619.857	32.265											1157.63	74.4878
																						621.782	38.2074											1186.12	51.4066
																						622.647	37.8918											1215.22	127.764
																						623.693	25.3273											1219.13	60.4981
																						625.131	30.0168											1226.56	294.44
																						626.539	26.1876											1255.37	108.426
																						627.126	86.0821											1272.81	57.2209
																						628.272	28.5932											1301.42	107.76
																						628.286	23.3011											1309.9	93.6255
																						637.717	59.3654											1311.16	85.3197
																						638.968	31.0824											1326.84	228.749
																						642.297	26.3285											1340.08	144.847
																						643.234	48.9532											1386.63	92.3394
																						643.926	29.5479											1390.78	100.403
																						644.428	64.9407											1392.67	57.1055
																						652.804	28.1752											1422.54	98.7057
																						656.208	51.1431											1491.56	134.104
																						663.623	27.2087											1503.82	86.1475
																						666.684	83.7989											1504.02	74.9602
																						671.897	48.2812											1515.1	101.926
																						677.137	38.352											1532.15	99.2293
																						681.839	83.0649											1532.53	57.0182
																						707.011	35.1165											1538.96	73.4598
																						711.919	25.5503											1556.33	116.404
																						718.926	72.1176											1560.97	228.128
																						726.53	39.5975											1671.71	78.938
																						733.314	62.9008											1695.28	64.5722
																						749.57	25.9716											1716.62	121.821
																						755.935	50.3599											1716.82	59.7077
																						757.842	32.5982											1724.57	48.6322
																						766.355	27.7577											1731.12	71.9553
																						777.152	55.9983											1752.12	69.7754
																						794.102	44.0149											1757.01	98.9676
																						802.833	42.5501											1757.48	58.697
																						820.599	41.0441											1781.98	61.4872
																						821.708	76.1726											1783.24	212.326
																						825.552	58.3094											1791.51	67.7893
																						873.07	115.372											1796.88	53.1653
																						877.431	65.4548											1837.83	89.2222
																						891.135	30.4567											1868.52	51.4446
																						901.283	63.5686											1878.86	64.4081
																						901.849	39.6503											1960.29	81.224
																						910.061	41.2252											1961.73	132.432
																						913.011	44.0926											1969.65	144.99
																						916.831	102.931											1975.87	74.8674
																						930.135	31.5356											1984.54	61.6992
																						943.055	35.0309											1986.49	91.4993
																						957.462	44.0597											2002.15	50.0546
																						957.977	165.082											2049.6	78.6247
																						965.137	177.679											2056.9	57.6641
																						967.393	91.1512											2067.59	51.9936
																						968.111	44.7475											2068.11	67.9916
																						969.273	161.718											2070.82	224.086
																						978.708	81.7349											2077.72	71.6101
																						981.717	50.9882											2087.15	85.9874
																						985.366	184.255											2088.56	54.8066
																						985.409	42.5553											2106.53	71.9235
																						986.945	72.919											2112.48	63.9526
																						988.356	49.7308											2114.66	69.5173
																						988.719	30.5236											2136.65	44.2391
																						993.67	56.585											2167.86	136.774
																						995.74	42.9554											2514.65	80.8782
																						998.622	41.7482											2553.76	70.0839
																						1002.44	30.8676											2567.55	56.1495
																						1005.72	65.4028											2587.84	141.954
																						1006.36	56.0145											2651.35	83.7194
																						1008.94	149.458											2721.19	58.8301
																						1010.57	38.1833											2725.31	55.4077
																						1015.95	62.1407											2840.67	57.0522
																						1016.53	45.4626
																						1020.26	41.6119
																						1022.74	45.4907
																						1025.51	37.5899
																						1028.95	68.8771
																						1032.38	38.836
																						1038.28	134.665
																						1041.7	88.4785
																						1065.8	31.5526
																						1069.09	95.4287
																						1070.7	90.4549
																						1072.01	60.6618
																						1097.63	24.1432
																						1125.16	105.651
																						1127.02	66.7337
																						1127.25	126.102
																						1134.55	60.3605
																						1138.84	82.8352
																						1143.74	28.8188
																						1144.93	31.3099
																						1146.53	40.4645
																						1158.88	93.9551
																						1160.22	53.0575
																						1160.9	57.5078
																						1162.23	45.9925
																						1170.23	77.7716
																						1180.92	159.236
																						1182.8	38.0943
																						1183.03	57.0418
																						1184.89	103.114
																						1188.87	114.348
																						1222.26	283.084
																						1225.66	316.797
																						1231.55	245.984
																						1233.65	92.9836
																						1242.3	86.7721
																						1251.19	147.841
																						1266.64	156.474
																						1275.46	89.6505
																						1278.37	143.258
																						1341.72	70.1004
																						1351.77	232.802
																						1363.5	92.1676
																						1364.14	67.3718
																						1375.1	94.8964
																						1432.18	102.289
																						1433.72	72.9243
																						1434.37	94.5947
																						1452.92	129.785
																						1453.81	118.915
																						1458.35	88.0978
																						1484.92	146.748
																						1494.43	75.5425
																						1503.29	247.282
																						1510.94	280.587
																						1523.86	123.759
																						1542.29	158.446
																						1574.81	123.005
																						1608.34	113.499
																						1625.12	240.217
																						1629.99	105.789
																						1647.78	95.287
																						1648.61	153.205
																						1674.93	194.136
																						1690.48	181.666
																						1717.83	187.66
																						1719.29	215.945
																						1722.37	226.356
																						1733.39	101.329
																						1749.83	88.6204
																						1758.13	79.3613
																						1765.24	131.318
																						1773.82	153.813
																						1784.89	223.313
																						1813.64	57.914
																						1837.06	91.2048
																						1839.78	150.248
																						1863.97	131.812
																						1897.79	98.4178
																						1917.25	146.636
																						1921.96	163.842
																						1939.98	84.8837
																						1945.07	145.268
																						1956.15	83.6242
																						1979.11	89.0526
																						1982.99	321.447
																						1984.6	81.5368
																						1994.63	130.281
																						1998.82	338.489
																						2003.04	128.472
																						2027.22	90.9956
																						2067.68	93.0887
																						2087.06	114.78
																						2088.6	80.6286
																						2090.77	63.9066
																						2093.14	57.8347
																						2105.4	60.7824
																						2147.26	92.7848
																						2151.92	262.869
																						2186.68	126.194
																						2188.06	73.2581
																						2224.91	104.122
																						2245.99	77.9059
																						2369.93	213.943
																						2394.3	136.947
																						2403.4	88.2838
																						2551.9	86.7096
																						2564.12	65.344
																						2579.2	78.3186
																						2651.96	168.684
																						2875.6	76.4289
																						3309.38	118.427
																						86.3485	1.80123
																						160.442	2.47201
																						160.504	4.05818
																						268.567	16.8352
																						273.483	19.5467
																						296.615	12.4075
																						330.519	9.27903
																						334.861	24.8651
																						444.659	26.9833
																						455.654	12.8458
																						460.59	29.6941
																						465.786	4.67331
																						468.118	10.4754
																						474.64	4.85044
																						476.727	7.72005
																						481.679	4.64124
																						482.306	5.94823
																						484.559	6.90858
																						488.967	20.1538
																						491.562	13.4414
																						498.383	14.0045
																						501.915	15.8383
																						508.045	15.9264
																						521.103	15.7188
																						523.468	22.2228
																						523.596	16.5958
																						528.326	6.69579
																						528.606	19.59
																						538.643	21.497
																						549.059	31.5797
																						566.514	12.6906
																						572.58	27.8328
																						622.515	31.6878
																						626.943	19.476
																						692.805	11.2983
																						708.044	18.373
																						814.788	77
																						831.753	8.73972
																						901.552	27.9328
																						1024.03	27.1825
																						1044.39	77.8075
																						1045.04	55.6831
																						1046.12	73.016
																						1066.09	63.9995
																						1090.75	60.5454
																						1096.81	98.1804
																						1132.59	69.9583
																						1134.92	45.8203
																						1141.61	62.8421
																						1164.21	71.7468
																						1174.57	66.1344
																						1212.09	95.534
																						1249.71	61.865
																						1257.79	52.6094
																						1354.6	47.1065
																						1355.79	80.8468
																						1370.69	55.9133
																						1409.78	44.8644
																						1513.2	59.2906
																						1787.67	47.8026
																						1807.18	57.0845
																						1843.73	57.2376
																						1878.77	55.1483
																						1880.96	48.2959
																						1955.26	38.6393
																						1997.4	40.1621
																						2052.77	31.4886
																						2709.69	43.5518
																						2755.88	39.7608
																						74.2283	0.974195
																						92.0052	0.950058
																						92.6098	0.919478
																						140.013	4.51522
																						264.923	2.59567
																						273.91	2.68172
																						293.071	6.647
																						318.5	23.7421
																						333.741	8.26133
																						368.414	9.59665
																						425.33	6.83262
																						436.423	17.8075
																						437.022	8.70427
																						439.542	18.1854
																						464.242	12.1834
																						464.285	17.7392
																						465.176	7.27038
																						468.607	13.469
																						478.502	16.9712
																						478.897	11.2616
																						484.361	6.53256
																						513.008	7.19965
																						520.905	8.30689
																						523.042	34.2628
																						534.513	11.1824
																						536.568	11.0178
																						567.635	7.60706
																						575.293	5.50379
																						577.464	11.3785
																						580.746	7.33069
																						584.205	12.399
																						597.022	42.7659
																						614.391	32.114
																						621.261	9.35778
																						641.259	12.8183
																						643.69	18.0104
																						649.652	9.39349
																						669.334	29.1178
																						683.225	12.1875
																						746.458	38.9085
																						1001.4	70.2957
																						1028.21	68.7705
																						1035.65	73.5985
																						1074.73	41.165
																						1103.62	120.456
																						1106.74	53.6078
																						1118.44	59.6892
																						1147.21	106.13
																						1162.84	112.64
																						1235.13	53.0242
																						1330.83	80.1456
																						1339.3	138.973
																						1354.98	133.629
																						1362.77	59.0819
																						1372.64	60.1577
																						1384.6	80.3123
																						1447.33	45.7992
																						1483.96	78.4809
																						1501.35	59.7527
																						1518.61	98.1078
																						1525.75	61.4573
																						1529.23	53.5287
																						1566.99	507.009
																						1807.79	53.0849
																						1847.47	104.612
																						1892.74	49.3238
																						1923.31	128.174
																						2052.78	63.2435
																						2106.04	38.9813
																						2486.7	38.1018
																						2624.33	67.5273
																						2723.36	46.7913
																						3428.64	49.7385
																						34.211	1.67889
																						36.8572	2.9674
																						36.9399	4.31558
																						37.0777	1.85236
																						37.3378	2.68446
																						37.5457	2.95964
																						38.4874	2.89982
																						39.0582	2.69581
																						39.3209	5.57265
																						43.2306	2.72536
																						43.9586	3.13647
																						52.813	2.65125
																						55.3375	4.54357
																						56.2899	6.19774
																						56.8186	5.41125
																						71.015	4.8604
																						71.3039	4.26881
																						72.8058	2.16197
																						73.7076	11.9057
																						74.3605	5.44313
																						74.6378	5.56672
																						76.8393	8.27641
																						79.8529	6.37628
																						80.9889	4.20215
																						82.4906	5.14493
																						83.3395	4.92397
																						85.4183	5.38831
																						86.1321	4.25528
																						87.2974	5.6104
																						88.7623	11.6464
																						89.6021	5.51614
																						91.5072	4.34847
																						94.1113	6.09887
																						94.5033	2.82653
																						95.1983	3.32316
																						104.389	5.56509
																						104.599	8.04807
																						144.928	5.74212
																						146.138	5.19957
																						147.771	14.6474
																						147.81	10.6294
																						150.508	11.094
																						151.632	9.67642
																						154.826	19.6569
																						156.348	4.27537
																						178.652	13.2587
																						186.615	13.1342
																						193.841	13.5317
																						199.955	4.64208
																						213.019	19.5441
																						231.179	11.4851
																						235.814	9.8181
																						237.577	9.68638
																						238.901	5.83413
																						242.893	6.90591
																						246.44	6.98414
																						248.378	10.707
																						252.214	19.4263
																						252.271	17.0309
																						257.717	8.49529
																						257.982	9.02678
																						258.707	13.9406
																						263.213	14.9922
																						264.289	9.71883
																						270.23	13.4499
																						271.22	9.65233
																						271.539	30.0584
																						273.03	18.9901
																						275.824	17.4524
																						276.357	36.5189
																						279.901	28.3976
																						297.342	15.6384
																						298.692	15.5421
																						303.557	12.0824
																						327.301	39.4417
																						330.88	12.0416
																						347.879	17.4941
																						361.681	19.6857
																						383.907	15.6904
																						387.919	34.4713
																						393.72	20.5858
																						396.937	44.04
																						411.478	28.1847
																						415.801	32.1953
																						421.393	23.5483
																						436.528	55.9752
																						440.408	35.9487
																						442.089	58.6629
																						442.702	73.3126
																						448.364	10.9196
																						451.751	15.3197
																						462.239	12.752
																						463.286	12.8837
																						470.813	13.408
																						474.196	23.0527
																						474.205	28.7976
																						481.666	53.2415
																						483.409	30.6398
																						483.697	35.6438
																						484.809	27.5386
																						484.995	40.5819
																						485.565	57.7117
																						486.33	30.2076
																						487.738	11.5259
																						488.508	19.8857
																						489.885	39.7966
																						491.701	17.0397
																						495.997	37.3875
																						498.983	24.0197
																						501.098	28.7321
																						503.677	23.9479
																						507.017	23.1338
																						512.047	50.2493
																						513.455	57.8499
																						518.729	26.0503
																						520.305	26.497
																						521.334	41.2859
																						523.017	30.5423
																						524.07	14.8076
																						525.107	18.8584
																						525.585	25.5861
																						526.19	44.1531
																						529.949	30.9512
																						532.641	25.9894
																						533.739	51.3294
																						534.534	24.4919
																						535.003	75.2634
																						540.142	26.7098
																						540.526	37.0164
																						541.922	51.3252
																						542.019	21.3876
																						542.571	19.4826
																						545.027	15.4895
																						545.409	41.4299
																						547.665	72.2762
																						548.442	26.3634
																						551.325	21.0933
																						551.458	17.1037
																						553.437	14.7424
																						553.448	22.6764
																						554.39	23.8776
																						561.464	26.1591
																						561.493	54.3683
																						562.708	13.4969
																						563.005	54.1576
																						565.676	25.5813
																						568.505	65.7631
																						572.484	85.6927
																						575.141	37.5152
																						578.947	13.9983
																						580.024	22.5543
																						581.859	41.3101
																						582.735	21.7819
																						584.151	57.3849
																						585.862	104.861
																						588.697	47.0019
																						595.473	60.0997
																						596.813	32.6448
																						597.618	73.9758
																						598.952	29.9511
																						600.159	33.1686
																						603.818	61.6078
																						603.957	72.1945
																						604.679	36.6949
																						609.739	73.9774
																						610.074	28.9815
																						615.904	54.3934
																						616.63	33.6723
																						617.415	64.2342
																						619.293	29.0623
																						619.731	84.6599
																						624.127	29.9075
																						626.741	27.5096
																						627.926	31.1106
																						629.448	23.862
																						629.453	42.4586
																						629.551	68.2545
																						629.67	35.6556
																						631.408	45.8783
																						643.58	22.1653
																						644.066	65.0555
																						647.435	41.4486
																						650.481	40.701
																						650.632	37.1815
																						656.332	43.3609
																						657.764	53.6439
																						665.366	15.7838
																						670.977	40.3374
																						696.005	33.9581
																						720.505	33.7137
																						764.309	27.8774
																						774.943	22.6811
																						776.741	24.5837
																						788.043	55.8005
																						815.231	87.2129
																						847.081	162.852
																						874.18	213.713
																						875.899	198.859
																						879.571	76.3354
																						902.868	176.059
																						906.591	213.962
																						918.303	194.746
																						926.982	176.954
																						930.232	105.668
																						946.658	102.593
																						950.857	87.5279
																						963.468	136.426
																						965.117	61.0434
																						967.732	134.644
																						969.321	93.8158
																						972.086	188.574
																						976.631	126.128
																						977.745	104.651
																						983.706	258.893
																						984.901	75.0723
																						1000.16	98.7309
																						1005.93	138.955
																						1011.81	189.778
																						1012.51	138.414
																						1013.96	177.795
																						1016.74	93.0619
																						1017.34	141.777
																						1021.02	145.046
																						1022.78	119.663
																						1024.21	108.669
																						1025.25	111.919
																						1026.74	198.225
																						1028.03	226.025
																						1032.96	153.183
																						1038.18	118.446
																						1040.77	182.298
																						1043.98	107.377
																						1044.48	342.547
																						1044.83	70.5755
																						1059.16	123.8
																						1062.06	99.7421
																						1066.98	126.215
																						1069.92	101.86
																						1070.65	355.003
																						1079.74	186.256
																						1084.46	99.6903
																						1091.81	125.021
																						1095.84	78.6473
																						1099	147.403
																						1100.37	180.404
																						1105.09	173.841
																						1112.79	101.184
																						1135.84	261.068
																						1136.5	193.951
																						1141.05	174.42
																						1145.17	361.2
																						1148.58	141.112
																						1153.91	104.034
																						1155.46	192.165
																						1163.25	60.4678
																						1164.84	257.303
																						1179.84	172.975
																						1185.56	172.165
																						1192.56	128.123
																						1199.68	65.1585
																						1200.24	61.7597
																						1205.46	101.335
																						1214.91	290.768
																						1218.89	155.499
																						1220.26	92.1447
																						1220.63	244.256
																						1231.43	116.705
																						1232.94	81.4883
																						1243.96	121.318
																						1244.41	74.2457
																						1260.55	166.62
																						1266.52	103.465
																						1269.21	84.4985
																						1300.44	202.67
																						1302.84	251.885
																						1304.74	75.1907
																						1313.84	209.447
																						1315.54	131.098
																						1339.32	119.244
																						1345.15	74.8452
																						1346.04	168.148
																						1347.8	151.988
																						1358.37	148.983
																						1361.6	129.097
																						1366.47	248.981
																						1401.13	54.0817
																						1425.49	79.6931
																						1426.26	68.9899
																						1429.33	92.32
																						1444.27	98.9801
																						1464.76	62.6028
																						1486.33	91.881
																						1499.9	122.687
																						1525.66	135.21
																						1530.67	173.728
																						1550.04	137.655
																						1553.36	133.579
																						1564.66	144.045
																						1579.23	81.8099
																						1580.73	56.1905
																						1583.97	161.434
																						1633.87	147.329
																						1662.37	126.719
																						1663.99	133.595
																						1689.71	162.265
																						1691.89	49.8591
																						1720.72	133.61
																						1724.01	46.2018
																						1728.34	65.1148
																						1747.97	38.8446
																						1749.12	59.6974
																						1761.11	84.6822
																						1770.44	143.946
																						1798.46	90.0901
																						1800.67	108.973
																						1833.76	72.8295
																						1833.9	227.066
																						1841.75	94.5083
																						1853.37	86.4461
																						1929.32	258.618
																						1938.46	163.901
																						1941.61	60.8926
																						1944.69	140.102
																						1959.65	52.4801
																						1983.36	109.541
																						2012.31	110.994
																						2066.83	63.8937
																						2072.65	73.0371
																						2087.68	80.3302
																						2112.66	134.253
																						2160.88	84.6989
																						2484.52	83.0521
																						2511.61	104.292
																						2581	58.4537
																						2696.07	48.5303
																						2733.11	41.0454
																						3290	47.4978
																						37.7582	3.18509
																						39.863	2.9125
																						40.5809	2.96112
																						46.646	4.75023
																						57.1198	7.22182
																						61.7581	5.95552
																						62.946	5.27997
																						69.4988	5.50961
																						71.1759	3.90455
																						71.9525	5.13311
																						72.4964	4.48806
																						75.3861	6.54855
																						77.1189	3.98469
																						78.502	4.60561
																						79.9246	1.91899
																						80.3057	12.431
																						86.2328	3.38001
																						89.095	5.93075
																						105.199	10.6607
																						125.509	9.41474
																						145.709	5.58363
																						146.217	10.6225
																						154.578	11.003
																						157.748	8.51756
																						166.243	7.93267
																						184.562	6.15682
																						184.755	10.6677
																						187.854	10.1774
																						208.728	10.8319
																						226.778	16.3529
																						230.18	10.5178
																						231.468	18.1778
																						232.851	16.8756
																						237.492	16.7548
																						237.828	12.3752
																						241.92	21.8858
																						244.088	9.40802
																						246.419	7.15631
																						248.466	12.1112
																						248.802	15.762
																						248.926	16.0634
																						249.528	16.7168
																						249.699	12.9813
																						250.96	4.72408
																						253.033	8.31133
																						256.18	13.9444
																						256.527	15.9684
																						256.965	10.4165
																						257.066	8.07589
																						257.208	44.3338
																						257.709	10.1099
																						258.331	14.3831
																						258.338	19.7148
																						259.627	14.9422
																						260.331	12.2603
																						262.963	15.0234
																						267.487	11.9737
																						267.994	10.8214
																						268.338	10.0522
																						271.744	12.0687
																						272.3	6.78145
																						272.357	6.9221
																						280.843	7.18353
																						281.218	13.7659
																						281.27	12.8817
																						281.427	14.1928
																						284.39	8.65585
																						285.89	11.9069
																						286.573	30.1592
																						297.36	16.9534
																						318.218	15.2111
																						320.334	14.6899
																						325.299	6.94846
																						335.15	10.4932
																						338.122	11.4743
																						338.586	21.889
																						346.913	24.5704
																						351.422	13.6982
																						356.479	5.37801
																						360.623	23.4342
																						407.291	21.0845
																						417.882	31.2844
																						431.386	13.9358
																						445.818	16.1749
																						446.039	26.6889
																						451.843	29.9562
																						454.052	18.3109
																						454.597	26.9346
																						456.047	47.5975
																						460.992	37.4122
																						464.382	85.593
																						467.163	36.8468
																						472.974	15.6097
																						473.999	21.1438
																						476.177	34.9979
																						481.995	18.0285
																						483.7	14.329
																						484.877	36.6969
																						486.252	15.1496
																						489.483	18.5843
																						489.635	21.1137
																						491.751	35.6614
																						499.933	14.6466
																						505.006	24.3737
																						506.668	29.0283
																						509.928	9.77793
																						510.484	19.9538
																						511.815	21.6952
																						515.109	17.7973
																						517.769	38.3127
																						518.893	32.2724
																						521.998	40.6649
																						523.905	24.635
																						524.407	40.605
																						525.57	42.58
																						527.029	34.1036
																						530.008	36.4802
																						530.526	27.039
																						531.591	27.2128
																						533.307	30.0807
																						533.758	37.0527
																						534.599	30.7637
																						542.129	33.5201
																						543.583	37.8387
																						543.952	22.6796
																						545.399	17.346
																						545.971	40.2834
																						546.261	25.6196
																						546.508	31.4387
																						547.149	11.7809
																						549.553	20.56
																						560.451	27.2352
																						568.328	17.4026
																						569.803	26.5171
																						574.836	77.4427
																						575.002	34.9011
																						577.541	73.4274
																						578.171	28.0047
																						578.85	37.442
																						578.974	12.1225
																						582.799	45.0203
																						585.18	41.3947
																						589.607	22.1729
																						590.438	27.0287
																						591.776	13.5023
																						592.986	15.5329
																						593.317	13.16
																						594.162	49.6885
																						595.989	17.2145
																						596.157	15.7864
																						597.499	70.2118
																						597.68	58.6448
																						599.954	37.9944
																						601.165	45.3293
																						602.536	23.7699
																						603.112	37.4979
																						604.918	42.5299
																						611.032	19.7755
																						611.574	39.6026
																						616.393	25.3946
																						619.969	29.0114
																						626.89	58.2736
																						626.987	83.7701
																						633.608	21.9245
																						635.344	23.9949
																						637.533	17.9669
																						640.35	17.0827
																						645.397	14.2811
																						647.136	45.5252
																						659.818	33.9258
																						668.62	15.6163
																						673.17	24.1951
																						681.959	58.2203
																						698.833	60.6886
																						712.638	78.182
																						731.253	32.539
																						733.479	24.911
																						744.996	30.7482
																						746.466	54.7079
																						842.451	142.018
																						924.26	143.661
																						931.644	178.993
																						943.064	99.6668
																						943.886	109.369
																						946.608	119.326
																						949.457	157.562
																						959.703	142.204
																						963.411	138.268
																						964.06	186.053
																						975.497	121.734
																						984.186	125.789
																						1003.64	112.537
																						1017.79	76.0453
																						1019.92	116.776
																						1027.96	67.704
																						1035.39	262.651
																						1036	76.4421
																						1036.19	112.947
																						1040.02	172.13
																						1041.54	123.661
																						1041.82	73.6345
																						1044.97	59.1729
																						1054.33	118.258
																						1058.08	123.101
																						1061.17	63.7347
																						1064.49	199.39
																						1067.29	143.04
																						1070.44	76.526
																						1070.6	64.853
																						1076.83	192.737
																						1078.13	143.418
																						1079.47	314.041
																						1086.91	146.234
																						1087.96	124.652
																						1088.89	128.94
																						1089.3	326.193
																						1098.7	74.7528
																						1101.28	115.703
																						1101.34	108.053
																						1103.46	100.264
																						1107.83	87.4066
																						1115.45	93.2549
																						1118.76	108.966
																						1124.84	66.9623
																						1128.49	78.8331
																						1132.08	326.27
																						1134.16	149.175
																						1138.95	120.655
																						1141.24	113.185
																						1150.14	131.709
																						1166.11	189.222
																						1166.34	107.723
																						1180.28	93.448
																						1182.21	391.931
																						1184.63	125.287
																						1188.8	116.665
																						1196.43	88.7415
																						1198.95	83.2329
																						1200.56	75.0865
																						1203.07	68.6812
																						1223.81	95.9917
																						1225.32	79.0505
																						1237.8	90.6047
																						1238.96	150.097
																						1244.48	239.263
																						1249.02	102.183
																						1249.46	129.177
																						1258.87	90.0375
																						1265.35	78.0855
																						1268.95	104.97
																						1292.15	308.867
																						1296.5	69.6162
																						1297.51	296.743
																						1311.6	79.2539
																						1313.73	99.148
																						1325.8	288.483
																						1331.91	168.483
																						1348.08	79.9107
																						1348.67	176.038
																						1352.24	202.936
																						1355.42	95.719
																						1363.71	93.9385
																						1375.44	57.6201
																						1375.79	114.553
																						1392.49	58.4167
																						1393.46	100.614
																						1402.27	87.1734
																						1408.98	64.8894
																						1423.59	116.483
																						1424.11	243.583
																						1480.01	56.0293
																						1482.75	81.8411
																						1484.1	131.97
																						1514.78	45.1985
																						1533.04	203.61
																						1533.32	69.8507
																						1534.18	163.59
																						1538.3	111.313
																						1538.93	309.583
																						1556.83	69.4871
																						1558.58	41.785
																						1559.05	89.1187
																						1559.25	72.8587
																						1595.12	154.32
																						1612.22	108.29
																						1645.78	55.8224
																						1664.35	338.422
																						1678.09	67.3915
																						1681.43	70.673
																						1701.49	55.5067
																						1710.64	70.3357
																						1722.16	87.3885
																						1731.59	111.709
																						1741.5	162.393
																						1747.6	60.3577
																						1767.21	137.053
																						1767.9	66.3396
																						1780.71	130.463
																						1782.92	52.0198
																						1785.93	104.326
																						1793.3	84.4281
																						1794.32	51.4559
																						1800.7	62.3778
																						1806.21	78.7666
																						1839.05	40.0088
																						1891.87	112.52
																						1893.94	104.208
																						1894.38	96.5894
																						1964.01	45.9352
																						1968.96	56.2523
																						1973.43	96.0924
																						1982.37	82.6753
																						1984.49	88.3158
																						1987.04	146.109
																						2002.14	191.511
																						2021.17	54.8277
																						2024.8	83.3161
																						2031.14	163.405
																						2097.78	109.891
																						2128.33	45.578
																						2166.1	138.48
																						2223.58	55.8095
																						2242.39	99.6088
																						2308.5	57.0206
																						2451.36	77.7801
																						2497.22	43.5762
																						2510.56	55.9997
																						2650.8	91.6471
																						2672.72	65.5445
																						2735.08	60.7903
																						2738	45.4603
																						2750.74	68.0119
																						2757.83	54.3997
																						35.5613	3.68353
																						37.4234	5.21432
																						38.7427	4.16513
																						39.3363	4.03337
																						39.4892	5.35329
																						41.3484	5.29228
																						42.347	4.68197
																						42.4916	6.9012
																						43.4786	3.34589
																						43.4955	3.26037
																						43.8346	5.97677
																						44.2171	2.45431
																						46.9981	3.64542
																						47.3216	6.07885
																						48.9419	4.88728
																						50.6895	3.86568
																						57.9524	7.1104
																						61.6542	5.79335
																						62.348	5.2875
																						65.3243	3.65627
																						67.4404	5.857
																						68.6018	6.62121
																						68.9821	5.83444
																						69.5658	5.79104
																						70.5335	6.43876
																						74.4951	6.96721
																						77.5421	5.04548
																						78.4358	4.84489
																						79.5872	6.43303
																						79.894	6.22278
																						80.0627	6.83167
																						82.4852	5.31162
																						83.4034	5.16598
																						84.4926	6.34856
																						85.5781	8.3417
																						85.8435	6.86062
																						85.8584	4.51479
																						86.3017	7.23763
																						86.7467	14.1385
																						89.4583	8.97316
																						91.3076	5.40773
																						94.8146	5.51315
																						94.881	5.236
																						96.3344	7.39005
																						97.3492	9.8139
																						143.264	9.02476
																						145.185	8.42468
																						149.745	9.73626
																						150.832	7.60048
																						151.472	9.20242
																						152.399	12.9652
																						157.411	13.003
																						159.903	16.0344
																						160.963	13.7915
																						161.842	13.7263
																						174.235	20.081
																						176.358	13.4196
																						198.794	17.4165
																						214.565	28.5413
																						216.431	19.3822
																						222.481	33.4439
																						226.196	28.2254
																						236.367	42.9879
																						241.217	13.7031
																						241.942	24.6167
																						242.34	19.8449
																						243.94	17.5569
																						245.472	17.353
																						246.63	22.5146
																						248.244	25.4275
																						249.477	14.8404
																						250.644	12.8276
																						250.855	13.9606
																						251.204	18.9052
																						254.546	24.7841
																						254.583	13.0773
																						256.129	17.507
																						261.628	17.9866
																						262.772	17.4455
																						262.916	22.7375
																						264.299	30.7022
																						264.355	14.7812
																						269.169	27.4052
																						269.86	19.1717
																						272.66	23.0837
																						274.439	26.2238
																						274.582	18.2942
																						275.759	21.2207
																						291.343	15.9505
																						292.507	15.1373
																						295.082	24.8616
																						302.115	29.6847
																						306.648	19.4875
																						316.108	40.043
																						331.903	22.4348
																						338.374	20.9436
																						356.522	30.1851
																						359.36	19.1579
																						359.833	29.3952
																						375.359	31.7611
																						390.482	33.4061
																						401.743	42.993
																						420.508	27.975
																						424.061	28.6446
																						428.189	40.1794
																						428.527	36.2401
																						436.724	45.7023
																						439.889	31.9581
																						446.329	46.5152
																						457.823	22.5313
																						466.295	54.9414
																						466.467	56.9984
																						473.794	26.5006
																						474.744	25.1071
																						475.999	39.3579
																						483.322	63.7185
																						483.83	54.0884
																						486.817	76.3406
																						491.671	24.3723
																						492.121	75.3402
																						493.365	31.427
																						494.455	38.6298
																						498.092	25.0908
																						500.887	33.3386
																						503.099	45.5351
																						508.229	37.6891
																						509.403	38.5078
																						510.762	30.1704
																						511.994	37.4209
																						513.387	44.1299
																						515.502	50.0533
																						516.065	44.6076
																						519.912	25.5737
																						520.842	36.3218
																						526.93	32.3539
																						528.285	56.9753
																						529.024	39.5874
																						531.95	38.3247
[truncated: 934 more rows]

## Sheet: All_PDPs
	290618-02	300618-01	CWT-1	300618-02	300618-03	300618-04	CWT-5	CQT-2	300618-05	300618-06	300618-07	Merged	Ordovician Calapuja and San Gabon Altiplano Peru Reimann et al. (2010) and Perez and Horton (2014)	Ordovician (Sandia and Amatura) Eastern Cordillera Bolivia and Peru Reimann et al. (2010)	Devonian-Carboniferous (Cabanillas, Lampa, Ambo) Peruvian Eastern Cordillera and Altiplano (Perez and Horton, 2014; Reimann et al., 2010)	Silurian-Carboniferous Bolivian Eastern Cordillera (Leier et al., 2010)	Late Jurassic-Early Cretaceous (Huancané and Muni) Eastern Cordillera and Altiplano (Sundell et al., 2018, Perez and Horton, 2014)	Late Jurassic-Early Cretaceous (Hualhuani, Labra, Puente) Peru (Sundell et al., 2018)
1	1.60931e-06	1.32908e-06	9.1229e-49	6.59274e-18	8.11295e-14	1.59598e-13	1.11507e-13	1.43845e-101	6.74578e-19	8.72103e-15	7.52819e-12	3.25715e-07	3.07689e-13	2.5203e-15	1.92847e-15	1.00117e-08	3.53846e-16	1.48221e-17
2	1.61237e-06	1.33206e-06	3.07144e-48	7.20652e-18	8.36883e-14	1.65223e-13	1.14257e-13	2.48991e-101	7.08314e-19	9.04563e-15	7.75851e-12	3.26387e-07	3.18122e-13	2.6014e-15	2.01375e-15	1.00681e-08	3.70533e-16	1.56043e-17
3	1.61543e-06	1.33504e-06	1.02866e-47	7.87633e-18	8.63258e-14	1.7104e-13	1.17072e-13	4.30707e-101	7.43707e-19	9.382e-15	7.99565e-12	3.27059e-07	3.28904e-13	2.68504e-15	2.10271e-15	1.01248e-08	4.17728e-16	1.6427e-17
4	1.61848e-06	1.33803e-06	3.42302e-47	8.6072e-18	8.90444e-14	1.77057e-13	1.19955e-13	7.44538e-101	7.80837e-19	9.73056e-15	8.23981e-12	3.27732e-07	3.40045e-13	2.77131e-15	2.19551e-15	1.01817e-08	7.6056e-16	1.72922e-17
5	1.62154e-06	1.34101e-06	1.13121e-46	9.40457e-18	9.18465e-14	1.83279e-13	1.22908e-13	1.28617e-100	8.19789e-19	1.00918e-14	8.49119e-12	3.28404e-07	3.51558e-13	2.86029e-15	2.2923e-15	1.02389e-08	3.74197e-15	1.8202e-17
6	1.62459e-06	1.344e-06	3.71182e-46	1.02744e-17	9.47346e-14	1.89714e-13	1.25931e-13	2.22033e-100	8.6065e-19	1.04667e-14	8.75e-12	3.29076e-07	3.63453e-13	2.95205e-15	2.39326e-15	1.02965e-08	2.81433e-14	1.91587e-17
7	1.62765e-06	1.34699e-06	1.20924e-45	1.12231e-17	9.77113e-14	1.96368e-13	1.29026e-13	3.83039e-100	9.03511e-19	1.08738e-14	9.01644e-12	3.29748e-07	3.75745e-13	3.04668e-15	2.49856e-15	1.03543e-08	2.10456e-13	2.01647e-17
8	1.6307e-06	1.34998e-06	3.91113e-45	1.22576e-17	1.00779e-13	2.0325e-13	1.32195e-13	6.60352e-100	9.48469e-19	1.17149e-14	9.29074e-12	3.30421e-07	3.88446e-13	3.14427e-15	2.60838e-15	1.04124e-08	1.44943e-12	2.12225e-17
9	1.63376e-06	1.35297e-06	1.25589e-44	1.33857e-17	1.03941e-13	2.10366e-13	1.3544e-13	1.13767e-99	9.95625e-19	2.07813e-14	9.57314e-12	3.31093e-07	4.01569e-13	3.24491e-15	2.72292e-15	1.04708e-08	9.10322e-12	2.23346e-17
10	1.63681e-06	1.35596e-06	4.00366e-44	1.46155e-17	1.072e-13	2.17724e-13	1.38763e-13	1.95867e-99	1.04512e-18	1.66689e-13	9.86588e-12	3.31766e-07	4.15128e-13	3.34869e-15	2.84236e-15	1.05295e-08	5.20703e-11	2.35038e-17
11	1.63986e-06	1.35895e-06	1.26713e-43	1.59563e-17	1.10558e-13	2.25332e-13	1.42165e-13	3.36989e-99	1.10051e-18	2.24638e-12	1.02578e-11	3.32438e-07	4.29137e-13	3.45571e-15	2.96691e-15	1.05885e-08	2.71207e-10	2.47329e-17
12	1.64291e-06	1.36194e-06	3.98142e-43	1.74209e-17	1.14019e-13	2.33199e-13	1.45648e-13	5.79397e-99	1.41087e-18	2.74302e-11	1.36623e-11	3.33114e-07	4.43612e-13	3.56607e-15	3.09679e-15	1.06477e-08	1.28624e-09	2.6025e-17
13	1.64596e-06	1.36493e-06	1.24197e-42	1.90555e-17	1.17585e-13	2.41332e-13	1.49214e-13	9.95506e-99	1.60254e-17	2.85481e-10	9.07082e-11	3.33824e-07	4.58566e-13	3.67986e-15	3.23222e-15	1.07073e-08	5.55464e-09	2.73832e-17
14	1.64903e-06	1.36793e-06	3.84629e-42	2.12711e-17	1.2126e-13	2.49741e-13	1.52865e-13	1.7093e-98	6.62289e-16	2.52056e-09	1.49909e-09	3.34907e-07	4.74017e-13	3.79719e-15	3.37343e-15	1.07672e-08	2.1844e-08	2.88109e-17
15	1.65219e-06	1.37092e-06	1.18257e-41	2.81881e-17	1.25047e-13	2.58435e-13	1.56603e-13	2.93292e-98	2.30435e-14	1.888e-08	2.06079e-08	3.39572e-07	4.89979e-13	3.91817e-15	3.52065e-15	1.08274e-08	7.82366e-08	3.03115e-17
16	1.65586e-06	1.37392e-06	3.60966e-41	7.88866e-17	1.2895e-13	2.67424e-13	1.60429e-13	5.02909e-98	6.27613e-13	1.20118e-07	2.11966e-07	3.73192e-07	5.0647e-13	4.04291e-15	3.67415e-15	1.08879e-08	2.55284e-07	3.18886e-17
17	1.66205e-06	1.37691e-06	1.09386e-40	5.203e-16	1.32971e-13	2.7672e-13	1.64347e-13	8.61757e-98	1.33591e-11	6.50575e-07	1.62163e-06	5.92428e-07	5.23506e-13	4.17153e-15	3.83417e-15	1.09486e-08	7.5935e-07	3.35461e-17
18	1.68014e-06	1.37991e-06	3.29089e-40	4.27895e-15	1.37115e-13	2.86403e-13	1.68358e-13	1.47566e-97	2.22404e-10	3.01037e-06	9.22573e-06	1.71597e-06	5.41106e-13	4.30413e-15	4.001e-15	1.10097e-08	2.06149e-06	3.52879e-17
19	1.75026e-06	1.38291e-06	9.82922e-40	3.53697e-14	1.41385e-13	2.97449e-13	1.72464e-13	2.52521e-97	2.90736e-09	1.19584e-05	3.93161e-05	6.11756e-06	5.59288e-13	4.44084e-15	4.1749e-15	1.10711e-08	5.11832e-06	3.71183e-17
20	2.03332e-06	1.3859e-06	2.91461e-39	2.89516e-13	1.45784e-13	3.21925e-13	1.76667e-13	4.31831e-97	3.02651e-08	4.1005e-05	0.000150342	2.19198e-05	5.78071e-13	4.58179e-15	4.35618e-15	1.11328e-08	1.16591e-05	3.90417e-17
21	3.13141e-06	1.3889e-06	8.58021e-39	2.35431e-12	1.50317e-13	4.91676e-13	1.8097e-13	7.37968e-97	2.60686e-07	0.000121998	0.000948336	0.000121154	5.97473e-13	4.7271e-15	4.54514e-15	1.11949e-08	2.44732e-05	4.10627e-17
22	7.13951e-06	1.3919e-06	2.50767e-38	1.87572e-11	1.54987e-13	2.07485e-12	1.85375e-13	1.26028e-96	2.03623e-06	0.000316495	0.00347873	0.000429067	6.17516e-13	4.8769e-15	4.74209e-15	1.12572e-08	4.75744e-05	4.31861e-17
23	2.07351e-05	1.39491e-06	7.2761e-38	1.42278e-10	1.59798e-13	1.58751e-11	1.89884e-13	2.15083e-96	1.65585e-05	0.000722354	0.00472594	0.000618451	6.3822e-13	5.03132e-15	4.94737e-15	1.13198e-08	8.60102e-05	4.5417e-17
24	6.28895e-05	1.39795e-06	2.09595e-37	9.97141e-10	1.64756e-13	1.24443e-10	1.945e-13	3.66818e-96	0.000124925	0.00148854	0.00387501	0.000626773	6.59607e-13	5.19052e-15	5.16131e-15	1.13828e-08	0.000144835	4.77608e-17
25	0.00018001	1.40137e-06	5.99405e-37	6.3219e-09	1.69872e-13	9.03285e-10	1.99225e-13	6.25177e-96	0.000596188	0.00293521	0.00159334	0.000605851	6.81697e-13	5.35463e-15	5.38427e-15	1.1446e-08	0.000226529	5.0223e-17
26	0.000466751	1.40838e-06	1.70182e-36	3.59805e-08	1.76218e-13	6.06268e-09	2.04061e-13	1.06478e-95	0.00145415	0.00575244	0.000642658	0.000957539	7.04516e-13	5.52379e-15	5.61663e-15	1.15096e-08	0.000326697	5.28094e-17
27	0.00108232	1.4453e-06	4.79694e-36	1.8522e-07	2.73193e-13	3.76492e-08	2.09012e-13	1.81229e-95	0.00186039	0.0102129	0.000632458	0.00157334	7.28084e-13	5.69816e-15	5.85876e-15	1.15735e-08	0.000430034	5.55263e-17
28	0.00225591	1.70611e-06	1.34236e-35	8.78494e-07	5.47591e-12	2.13346e-07	2.14079e-13	3.08248e-95	0.0016168	0.0143976	0.000703853	0.00214046	7.52428e-13	5.8779e-15	6.11107e-15	1.16377e-08	0.000511039	5.83799e-17
29	0.00428323	3.39343e-06	3.72932e-35	3.88295e-06	2.03804e-10	1.07596e-06	2.19266e-13	5.23938e-95	0.00137103	0.0157316	0.000624946	0.00246383	7.77572e-13	6.06317e-15	6.37398e-15	1.17023e-08	0.000542944	6.13772e-17
30	0.00744309	1.23551e-05	1.0286e-34	1.57094e-05	5.28389e-09	4.71636e-06	2.24575e-13	8.89952e-95	0.00122469	0.0130582	0.000412081	0.00246122	8.03542e-13	6.25412e-15	6.64792e-15	1.17671e-08	0.000511801	6.4525e-17
31	0.011726	4.9368e-05	2.81655e-34	5.56154e-05	9.24395e-08	1.8654e-05	2.30009e-13	1.51064e-94	0.000984055	0.00821656	0.000198365	0.00233143	8.30364e-13	6.45094e-15	6.93333e-15	1.18323e-08	0.000425851	6.78309e-17
32	0.0166628	0.000164209	7.65673e-34	0.000164444	1.09053e-06	0.000102161	2.35571e-13	2.56248e-94	0.000610009	0.00457104	6.94737e-05	0.0024216	8.58065e-13	6.65379e-15	7.23069e-15	1.18978e-08	0.000311917	7.13025e-17
33	0.0216545	0.000425661	2.06645e-33	0.000394633	8.68129e-06	0.000674025	2.41264e-13	4.34379e-94	0.000268136	0.00275756	1.78074e-05	0.00282305	8.86675e-13	6.86286e-15	7.54048e-15	1.19636e-08	0.00020103	7.49481e-17
34	0.0261672	0.000854357	5.53685e-33	0.000765295	4.67479e-05	0.00187484	2.4709e-13	7.3584e-94	8.1151e-05	0.00194851	3.61116e-06	0.0034221	9.16223e-13	7.07833e-15	7.86321e-15	1.20298e-08	0.000114217	7.8776e-17
35	0.0292108	0.00135149	1.47284e-32	0.00122534	0.000171662	0.00229869	2.53053e-13	1.24568e-93	1.69504e-05	0.00149114	1.13913e-06	0.00386083	9.46737e-13	7.30039e-15	8.19941e-15	1.20963e-08	5.74501e-05	8.27953e-17
36	0.0294821	0.00175347	3.88959e-32	0.00169549	0.00044013	0.00343279	2.59156e-13	2.10734e-93	2.51197e-06	0.00114718	1.37259e-06	0.00411226	9.78251e-13	7.52925e-15	8.54961e-15	1.21631e-08	2.57542e-05	8.70153e-17
37	0.0267936	0.00199358	1.01978e-31	0.00213939	0.000834328	0.00528029	2.65402e-13	3.56262e-93	2.79439e-07	0.000881573	2.42685e-06	0.00413365	1.01079e-12	7.76509e-15	8.91439e-15	1.22302e-08	1.03832e-05	9.14458e-17
38	0.0221323	0.00215401	2.6544e-31	0.00254024	0.00128436	0.00519968	2.71795e-13	6.01884e-93	2.52253e-08	0.000698122	4.25607e-06	0.00372515	1.0444e-12	8.00813e-15	9.29434e-15	1.22977e-08	3.80512e-06	9.6097e-17
39	0.0166257	0.00230976	6.85933e-31	0.00284282	0.00170569	0.00375914	2.78337e-13	1.01616e-92	1.95932e-09	0.000577919	7.20085e-06	0.00306233	1.07911e-12	8.25858e-15	9.69007e-15	1.23655e-08	1.28123e-06	1.0098e-16
40	0.0115921	0.0023755	1.75975e-30	0.00302264	0.00185765	0.00227748	2.85032e-13	1.71443e-92	1.30891e-10	0.000484816	1.17403e-05	0.00239281	1.11495e-12	8.51666e-15	1.01022e-14	1.24337e-08	3.99799e-07	1.06105e-16
41	0.00777395	0.00221505	4.48205e-30	0.00319965	0.00150859	0.00138581	2.91883e-13	2.89057e-92	7.37614e-12	0.00039154	1.84449e-05	0.0018371	1.15195e-12	8.7826e-15	1.05315e-14	1.25022e-08	1.16142e-07	1.11485e-16
42	0.00508381	0.00185044	1.13333e-29	0.00356545	0.000887611	0.00136385	2.98895e-13	4.87028e-92	6.70152e-13	0.000292466	2.79241e-05	0.00146857	1.19017e-12	9.05663e-15	1.09785e-14	1.2571e-08	3.14092e-08	1.17132e-16
43	0.00328251	0.00141871	2.84507e-29	0.00408277	0.000452574	0.00169078	3.0607e-13	8.20034e-92	8.09066e-13	0.000197593	4.07367e-05	0.00126665	1.22963e-12	9.33898e-15	1.1444e-14	1.26402e-08	7.8804e-09	1.23058e-16
44	0.00216365	0.0010238	7.09064e-29	0.00422431	0.000342775	0.00160352	3.13412e-13	1.3798e-91	1.78282e-12	0.000119467	5.7266e-05	0.00108902	1.27037e-12	9.62991e-15	1.19287e-14	1.27097e-08	1.82527e-09	1.29278e-16
45	0.00153163	0.000734332	1.75441e-28	0.00357846	0.000408985	0.00103378	3.20926e-13	2.32011e-91	3.91304e-12	6.43314e-05	7.75732e-05	0.000850371	1.31244e-12	9.92967e-15	1.24334e-14	1.27796e-08	3.88463e-10	1.35806e-16
46	0.00121774	0.000598829	4.30958e-28	0.00268704	0.000490101	0.000459594	3.28615e-13	3.89859e-91	8.44169e-12	3.07863e-05	0.000101258	0.000638539	1.35588e-12	1.02385e-14	1.29589e-14	1.28498e-08	7.56901e-11	1.42656e-16
47	0.00109853	0.000607296	1.05097e-27	0.00216151	0.000505444	0.000149158	3.36482e-13	6.54656e-91	1.7897e-11	1.30799e-05	0.000127366	0.000532072	1.40073e-12	1.05567e-14	1.35061e-14	1.29203e-08	1.34701e-11	1.49844e-16
48	0.00109196	0.000698309	2.54452e-27	0.0019197	0.000442433	4.9399e-05	3.44533e-13	1.09857e-90	3.72875e-11	4.93111e-06	0.000154376	0.000497034	1.44704e-12	1.08846e-14	1.40758e-14	1.29912e-08	2.18753e-12	1.57386e-16
49	0.00113758	0.000813042	6.11609e-27	0.00173428	0.000335169	6.11128e-05	3.52771e-13	1.84224e-90	7.63454e-11	1.64913e-06	0.000180306	0.000485144	1.49485e-12	1.12223e-14	1.46688e-14	1.30625e-08	3.25266e-13	1.65299e-16
50	0.00118167	0.000928192	1.45948e-26	0.00152324	0.000233763	0.000194741	3.612e-13	3.08726e-90	1.53616e-10	4.89186e-07	0.000202929	0.000484661	1.54421e-12	1.15703e-14	1.52862e-14	1.31341e-08	4.57136e-14	1.73602e-16
51	0.00117891	0.00104956	3.45762e-26	0.00125001	0.000173497	0.00056726	3.69825e-13	5.17019e-90	3.03755e-10	1.28695e-07	0.000220082	0.000504196	1.59517e-12	1.19287e-14	1.5929e-14	1.3206e-08	7.61131e-15	1.82312e-16
52	0.00110537	0.00118799	8.13228e-26	0.000921586	0.000163139	0.00115344	3.7865e-13	8.65262e-90	5.90272e-10	3.00259e-08	0.00023	0.000541118	1.64778e-12	1.2298e-14	1.6598e-14	1.32783e-08	2.95419e-15	1.9145e-16
53	0.000967319	0.00133907	1.8989e-25	0.000616761	0.000192848	0.0015706	3.87679e-13	1.44709e-89	1.12766e-09	6.2125e-09	0.000231619	0.000559628	1.7021e-12	1.26784e-14	1.72944e-14	1.3351e-08	2.50627e-15	2.01036e-16
54	0.000794766	0.00147732	4.40198e-25	0.000420982	0.000247599	0.0015821	3.96918e-13	2.41852e-89	2.13286e-09	1.13993e-09	0.000224765	0.00054108	1.75817e-12	1.30703e-14	1.80192e-14	1.3424e-08	2.54203e-15	2.11091e-16
55	0.000623058	0.00156494	1.01309e-24	0.000356439	0.000315872	0.00144516	4.0637e-13	4.03935e-89	4.37119e-09	1.85564e-10	0.000210178	0.000515781	1.81606e-12	1.3474e-14	1.87737e-14	1.34974e-08	2.63096e-15	2.21637e-16
56	0.000476158	0.00156883	2.31476e-24	0.000391865	0.000392792	0.00134971	4.16041e-13	6.74188e-89	1.60148e-08	2.70333e-11	0.00018939	0.000500196	1.87582e-12	1.38898e-14	1.95589e-14	1.35711e-08	2.728e-15	2.32699e-16
57	0.000361693	0.00147691	5.2507e-24	0.0004892	0.000479982	0.00121731	4.25936e-13	1.12449e-88	1.33057e-07	4.59119e-12	0.000164453	0.000480668	1.93751e-12	1.43181e-14	2.0376e-14	1.36452e-08	2.82898e-15	2.44301e-16
58	0.000276476	0.00130629	1.18245e-23	0.000625426	0.00058235	0.00099457	4.36059e-13	1.8743e-88	1.16993e-06	5.84816e-12	0.000137612	0.00045093	2.00119e-12	1.47592e-14	2.12264e-14	1.37197e-08	2.93365e-15	2.56468e-16
59	0.000214633	0.00109981	2.64367e-23	0.000785683	0.00070106	0.000728262	4.46416e-13	3.12198e-88	7.77653e-06	2.47588e-11	0.000110977	0.00041995	2.06692e-12	1.52136e-14	2.21114e-14	1.37946e-08	3.04211e-15	2.69228e-16
60	0.000172587	0.000912563	5.86794e-23	0.000953376	0.000824912	0.000483282	4.57011e-13	5.19668e-88	3.69744e-05	1.05399e-10	8.62685e-05	0.00040045	2.13478e-12	1.56816e-14	2.30322e-14	1.38698e-08	3.1545e-15	2.82608e-16
61	0.000150706	0.000795843	1.29306e-22	0.00111652	0.000926948	0.00029689	4.67851e-13	8.64431e-88	0.000124658	4.20734e-10	6.46675e-05	0.000403162	2.20482e-12	1.61636e-14	2.39904e-14	1.39453e-08	3.27094e-15	2.96639e-16
62	0.00015433	0.00078687	2.82908e-22	0.00128667	0.000973268	0.000176733	4.7894e-13	1.43695e-87	0.000297528	1.57059e-09	4.67907e-05	0.000435	2.27711e-12	1.666e-14	2.49874e-14	1.40213e-08	3.39159e-15	3.1135e-16
63	0.000195435	0.000907245	6.29755e-22	0.001496	0.000943041	0.000113649	4.90285e-13	2.38704e-87	0.000502524	5.48113e-09	3.27562e-05	0.000493054	2.35173e-12	1.71713e-14	2.60247e-14	1.40976e-08	3.51659e-15	3.26774e-16
64	0.000291784	0.00116248	7.73846e-21	0.00174693	0.000847403	9.52765e-05	5.01891e-13	3.96263e-87	0.000600615	1.78811e-08	2.23127e-05	0.000561425	2.42875e-12	1.76978e-14	2.7104e-14	1.41743e-08	3.6461e-15	3.42945e-16
65	0.000457496	0.00153138	1.77063e-18	0.00197278	0.000732722	0.000117075	5.13763e-13	6.57379e-87	0.000508104	5.45296e-08	1.49902e-05	0.000624837	2.50825e-12	1.82401e-14	2.82268e-14	1.42514e-08	3.78028e-15	3.59898e-16
66	0.000685025	0.0019513	3.2152e-16	0.00209501	0.000666222	0.00019016	5.25908e-13	1.08982e-86	0.000304623	1.55446e-07	1.02381e-05	0.000685435	2.59029e-12	1.87985e-14	2.93948e-14	1.43288e-08	3.91933e-15	3.77671e-16
67	0.000933329	0.00233087	3.85845e-14	0.00211289	0.00071576	0.000342108	5.38332e-13	1.80551e-86	0.000130419	4.14223e-07	7.53164e-06	0.000757665	2.67497e-12	1.93736e-14	3.06099e-14	1.44066e-08	4.06504e-15	3.96301e-16
68	0.00114167	0.00260875	3.05542e-12	0.002083	0.000929568	0.000602078	5.5104e-13	2.98919e-86	4.25555e-05	1.03181e-06	6.43889e-06	0.000850998	2.76237e-12	1.99658e-14	3.18738e-14	1.44848e-08	4.26598e-15	4.15829e-16
69	0.0012672	0.00281203	1.59651e-10	0.00202787	0.00130384	0.000969476	5.6404e-13	1.71277e-83	1.79099e-05	2.40254e-06	6.65166e-06	0.000963098	2.85257e-12	2.05756e-14	3.31885e-14	1.45634e-08	5.72365e-15	4.36297e-16
70	0.00132175	0.00303388	5.50449e-09	0.0019211	0.00174364	0.0014121	5.77338e-13	1.79359e-74	2.53167e-05	5.22942e-06	7.98804e-06	0.00108438	2.94565e-12	2.12035e-14	3.4556e-14	1.46424e-08	3.30381e-14	4.5775e-16
71	0.00138888	0.00333782	1.2523e-07	0.00174962	0.00207698	0.00198632	3.83754e-12	5.48994e-66	5.59317e-05	1.064e-05	1.0377e-05	0.00121547	3.04172e-12	2.18501e-14	3.59783e-14	1.47218e-08	5.01409e-13	4.80234e-16
72	0.00157714	0.00370607	1.87993e-06	0.00155289	0.00216453	0.00273066	3.20232e-07	4.89753e-58	0.000114683	2.02368e-05	1.38336e-05	0.00135997	3.14085e-12	2.25158e-14	3.74576e-14	1.48015e-08	7.17872e-12	5.03797e-16
73	0.00184265	0.00408386	1.86217e-05	0.00140701	0.00201936	0.00299915	0.000466736	1.27336e-50	0.00020388	3.59791e-05	1.84307e-05	0.00145555	3.24316e-12	2.32013e-14	3.8996e-14	1.48817e-08	8.58954e-11	5.28489e-16
74	0.00190739	0.00441156	0.000121714	0.00138547	0.00179954	0.0024256	0.010052	9.64915e-44	0.000310526	5.97953e-05	2.42777e-05	0.00166584	3.34874e-12	2.39071e-14	4.05958e-14	1.49622e-08	8.52486e-10	5.54363e-16
75	0.00160866	0.00459946	0.000524937	0.00152389	0.00166905	0.00183583	0.00319893	2.13104e-37	0.000405306	9.28949e-05	3.15227e-05	0.00144636	3.45768e-12	2.46338e-14	4.22595e-14	1.50431e-08	7.01411e-09	5.81476e-16
76	0.00116222	0.00459078	0.00149389	0.00180026	0.00166161	0.0015844	1.50428e-05	1.37171e-31	0.000461182	0.000134904	4.04325e-05	0.00135898	3.5701e-12	2.53819e-14	4.39895e-14	1.51244e-08	4.78419e-08	6.09883e-16
77	0.00082859	0.00452613	0.00280525	0.0021411	0.00168086	0.00150151	1.04595e-09	2.57332e-26	0.000483937	0.000183134	5.16578e-05	0.00139111	3.68611e-12	2.61522e-14	4.57884e-14	1.52062e-08	2.70515e-07	6.39646e-16
78	0.000634504	0.00466788	0.00347592	0.00245811	0.00172722	0.00153662	6.96331e-13	1.40699e-21	0.000520238	0.000232391	6.68248e-05	0.0014625	3.80581e-12	2.69452e-14	4.76588e-14	1.52883e-08	1.26801e-06	6.70828e-16
79	0.000503056	0.00495143	0.00284192	0.00269618	0.00208703	0.00169928	7.1155e-13	2.2421e-17	0.000606872	0.000275663	8.94449e-05	0.00157196	3.92932e-12	2.77616e-14	4.96035e-14	1.53708e-08	4.92723e-06	7.03494e-16
80	0.000392106	0.00498435	0.0015332	0.00285619	0.00221542	0.00194807	7.28211e-13	1.04131e-13	0.000698447	0.000305666	0.000125581	0.00161258	4.05676e-12	2.8602e-14	5.16254e-14	1.54537e-08	1.58719e-05	7.37714e-16
81	0.000295299	0.00472323	0.000545796	0.00297362	0.00133804	0.00219242	7.45252e-13	1.40953e-10	0.000690863	0.000316829	0.000182903	0.00149599	4.18825e-12	2.94672e-14	5.37274e-14	1.55371e-08	4.23843e-05	7.7356e-16
82	0.00021539	0.00444643	0.000128205	0.00307528	0.00060187	0.00235774	7.62679e-13	5.56072e-08	0.000548568	0.00030698	0.000266654	0.00138152	4.32392e-12	3.03579e-14	5.59126e-14	1.56208e-08	9.3827e-05	8.11107e-16
83	0.000154265	0.0042293	1.98712e-05	0.00315219	0.00045495	0.00243508	7.80502e-13	6.39371e-06	0.000354948	0.000278039	0.000373044	0.00133141	4.4639e-12	3.12747e-14	5.81841e-14	1.57049e-08	0.000172186	8.50434e-16
84	0.000112596	0.00399084	2.0323e-06	0.00316441	0.000593402	0.00245713	7.98729e-13	0.000214259	0.000211266	0.000235401	0.000484339	0.00131204	4.60832e-12	3.22185e-14	6.05455e-14	1.57895e-08	0.000261949	8.91622e-16
85	9.35223e-05	0.00368757	1.3715e-07	0.00306777	0.000858931	0.00243656	8.17368e-13	0.00209262	0.000144846	0.000186303	0.000571752	0.00133085	4.75732e-12	3.31899e-14	6.29999e-14	1.58745e-08	0.000330357	9.34759e-16
86	0.000108253	0.0033215	6.10725e-09	0.00284696	0.00106809	0.00235042	8.3643e-13	0.00595672	0.000127391	0.000137829	0.000607932	0.00136498	4.91104e-12	3.41898e-14	6.55511e-14	1.59598e-08	0.000345381	9.79933e-16
87	0.000177087	0.00291955	1.79458e-10	0.0025373	0.0010641	0.00218805	8.55923e-13	0.00494184	0.000127956	9.5317e-05	0.000582109	0.00123858	5.06963e-12	3.5219e-14	6.82027e-14	1.60456e-08	0.000299337	1.02724e-15
88	0.000313884	0.00252632	3.49496e-12	0.0022159	0.000878863	0.00199129	8.75861e-13	0.00119491	0.000131707	6.16181e-05	0.00050652	0.00102604	5.23323e-12	3.62784e-14	7.09585e-14	1.61318e-08	0.000215066	1.07677e-15
89	0.000494473	0.00218792	7.58482e-14	0.00196255	0.000664086	0.00182626	2.43343e-11	8.42064e-05	0.000134206	3.72353e-05	0.00040888	0.000893224	5.40201e-12	3.73687e-14	7.38225e-14	1.62185e-08	0.000128094	1.12864e-15
90	0.000643625	0.00193299	8.43516e-14	0.00182049	0.000505714	0.0017223	1.55538e-06	1.7295e-06	0.000134513	2.10334e-05	0.000317055	0.000818787	5.57613e-12	3.84909e-14	7.67989e-14	1.63055e-08	6.32463e-05	1.18295e-15
91	0.000679029	0.00176386	3.84795e-13	0.00178521	0.000392285	0.00167479	0.00125183	1.03529e-08	0.000132503	1.11064e-05	0.000247335	0.000802237	5.75574e-12	3.96458e-14	7.98918e-14	1.6393e-08	2.58874e-05	1.2398e-15
92	0.000583094	0.00166074	2.47311e-12	0.00181812	0.000295437	0.00173491	0.0164363	1.8062e-11	0.000128269	5.4821e-06	0.000202443	0.0011515	5.94102e-12	4.08344e-14	8.31058e-14	1.64809e-08	8.78397e-06	1.29933e-15
93	0.000419423	0.00159277	1.66709e-11	0.00186457	0.000210314	0.0019942	0.00957553	9.1841e-15	0.000122027	2.52947e-06	0.000176853	0.000976967	6.13214e-12	4.20577e-14	8.64454e-14	1.65693e-08	2.47082e-06	1.36164e-15
94	0.000272846	0.00152894	1.05594e-10	0.00186793	0.000144625	0.0022996	0.000124571	1.36104e-18	0.000114083	1.09099e-06	0.000163241	0.000743998	6.32929e-12	4.33166e-14	8.99154e-14	1.6658e-08	5.76153e-07	1.42687e-15
95	0.000186323	0.00144576	6.11398e-10	0.00178505	0.000103448	0.00222403	1.60777e-08	5.87856e-23	0.000104814	4.39863e-07	0.000156151	0.00069681	6.53264e-12	4.46121e-14	9.35206e-14	1.67472e-08	1.11375e-07	1.49516e-15
96	0.000154209	0.00133119	3.21498e-09	0.00160328	8.54953e-05	0.00165845	1.07087e-12	7.40006e-28	9.4636e-05	1.65778e-07	0.000152664	0.000589886	6.74239e-12	4.59453e-14	9.72663e-14	1.68369e-08	1.7849e-08	1.56663e-15
97	0.000152483	0.00118509	1.53284e-08	0.00134659	8.5646e-05	0.00099163	1.07675e-12	2.71497e-33	8.39704e-05	5.84041e-08	0.000151587	0.000464368	6.95874e-12	4.73172e-14	1.01158e-13	1.69269e-08	2.37401e-09	1.64143e-15
98	0.000162367	0.00101693	6.62364e-08	0.00106251	9.80766e-05	0.000559067	1.10165e-12	2.90308e-39	7.32203e-05	1.92341e-08	0.000152504	0.000362831	7.18189e-12	4.87289e-14	1.052e-13	1.70174e-08	2.67264e-10	1.71972e-15
99	0.000174933	0.000841795	2.5937e-07	0.000797734	0.000117902	0.000387816	1.12711e-12	9.04727e-46	6.2744e-05	5.92133e-09	0.000155177	0.000294143	7.41205e-12	5.01815e-14	1.094e-13	1.71084e-08	3.59914e-11	1.80166e-15
100	0.00018714	0.000676054	9.20344e-07	0.000579766	0.00014141	0.000379483	1.15315e-12	8.21753e-53	5.28383e-05	1.70417e-09	0.000159272	0.000251403	7.64943e-12	5.16762e-14	1.13762e-13	1.71998e-08	2.54433e-11	1.88741e-15
101	0.000198205	0.00053371	2.95926e-06	0.00041424	0.000165674	0.000454195	1.17976e-12	2.17535e-60	4.37286e-05	4.58632e-10	0.000164297	0.000227303	7.89425e-12	5.32141e-14	1.18294e-13	1.72916e-08	4.54482e-11	1.97714e-15
102	0.000208051	0.000423955	8.62218e-06	0.000293422	0.000188175	0.000562285	1.20698e-12	1.68669e-68	3.55653e-05	1.1555e-10	0.000169621	0.000216008	8.14675e-12	5.47966e-14	1.23e-13	1.73839e-08	8.57283e-11	2.07105e-15
103	0.000216868	0.000350287	2.27641e-05	0.000206065	0.00020667	0.000663244	1.2348e-12	4.99256e-70	2.84278e-05	2.73974e-11	0.000174527	0.000211765	8.40715e-12	5.64248e-14	1.27888e-13	1.74766e-08	1.59806e-10	2.16932e-15
104	0.000225012	0.000311139	5.44608e-05	0.000142784	0.000219281	0.000720891	1.26324e-12	2.95928e-69	2.23331e-05	6.26949e-12	0.000178295	0.000209104	8.6757e-12	5.80999e-14	1.32965e-13	1.75698e-08	2.93709e-10	2.27217e-15
105	0.000232956	0.000301554	0.000118064	9.70782e-05	0.00022469	0.000712862	1.29232e-12	1.73581e-68	1.72478e-05	1.55032e-12	0.000180269	0.000204299	8.95265e-12	5.98234e-14	1.38238e-13	1.76634e-08	5.32183e-10	2.37983e-15
106	0.000241243	0.000315195	0.000231927	6.45035e-05	0.00022232	0.000639418	1.32204e-12	1.00756e-67	1.31039e-05	5.73524e-13	0.00017993	0.00019651	9.23825e-12	6.15965e-14	1.43713e-13	1.77575e-08	9.50646e-10	2.49255e-15
107	0.00025042	0.000346048	0.000412847	4.17791e-05	0.000212422	0.000521713	1.35243e-12	5.78752e-67	9.81669e-06	3.92349e-13	0.000176941	0.000187541	9.53277e-12	6.34207e-14	1.494e-13	1.7852e-08	1.67413e-09	2.61063e-15
108	0.000260976	0.000389524	0.000665937	2.63297e-05	0.000196041	0.000390012	1.3835e-12	3.28979e-66	7.30844e-06	3.69099e-13	0.000171181	0.00018031	9.83648e-12	6.52974e-14	1.55304e-13	1.7947e-08	2.90651e-09	2.73445e-15
109	0.000273275	0.000442892	0.000973402	1.61169e-05	0.000174856	0.000270048	1.41526e-12	1.85053e-65	5.54225e-06	3.75344e-13	0.000162749	0.000177003	1.01497e-11	6.7228e-14	1.61435e-13	1.80425e-08	4.9747e-09	2.86448e-15
110	0.000287514	0.000505086	0.00128938	9.56469e-06	0.000150945	0.000175499	1.44772e-12	1.0301e-64	4.57263e-06	3.8701e-13	0.000151947	0.000178023	1.04726e-11	6.92141e-14	1.67801e-13	1.81384e-08	8.39407e-09	3.00137e-15
111	0.000303685	0.000575754	0.00154789	5.49354e-06	0.000126529	0.000108471	1.48091e-12	5.67433e-64	4.61941e-06	3.99907e-13	0.000139257	0.000182104	1.08056e-11	7.12571e-14	1.7441e-13	1.82348e-08	1.39633e-08	3.14609e-15
112	0.000321576	0.000653526	0.00168442	3.04923e-06	0.000103743	6.4397e-05	1.51483e-12	3.09317e-63	6.1624e-06	4.13368e-13	0.000125315	0.000187187	1.1149e-11	7.33588e-14	1.81272e-13	1.83317e-08	2.2899e-08	3.30008e-15
113	0.000340781	0.000733907	0.00166234	1.634e-06	8.4485e-05	3.68786e-05	1.54951e-12	1.66857e-62	1.00354e-05	4.27307e-13	0.000110917	0.000191395	1.1503e-11	7.55206e-14	1.88396e-13	1.8429e-08	3.70216e-08	3.46564e-15
114	0.000360749	0.000807896	0.00148956	8.45011e-07	7.03323e-05	2.03447e-05	1.58495e-12	8.90719e-62	1.74684e-05	4.41733e-13	9.70919e-05	0.000193593	1.1868e-11	7.77443e-14	1.95792e-13	1.85268e-08	5.90071e-08	3.64644e-15
115	0.000380832	0.000862699	0.00121561	4.21815e-07	6.25232e-05	1.07669e-05	1.62118e-12	4.70532e-61	2.99992e-05	4.56669e-13	8.52446e-05	0.000193486	1.22444e-11	8.00315e-14	2.03469e-13	1.86251e-08	9.27179e-08	3.84848e-15
116	0.000400354	0.000885127	0.00091091	2.03463e-07	6.19418e-05	5.45321e-06	1.65821e-12	2.45975e-60	4.91735e-05	4.72143e-13	7.7369e-05	0.000191448	1.26324e-11	8.23841e-14	2.11439e-13	1.87239e-08	1.43626e-07	4.08152e-15
117	0.000418674	0.000866605	0.00064059	9.50639e-08	6.9072e-05	2.66283e-06	1.69607e-12	1.27247e-59	7.60084e-05	4.88189e-13	7.6191e-05	0.000188344	1.30325e-11	8.48039e-14	2.19711e-13	1.88231e-08	2.19339e-07	4.36157e-15
118	0.000435241	0.000807238	0.000446374	4.33113e-08	8.38926e-05	1.30227e-06	1.73476e-12	6.51411e-59	0.000110306	5.04847e-13	8.50186e-05	0.000185393	1.3445e-11	8.72926e-14	2.28297e-13	1.89228e-08	3.30223e-07	4.71484e-15
119	0.000449633	0.000716518	0.000342647	1.97191e-08	0.000105725	7.16875e-07	1.7743e-12	3.30002e-58	0.000150058	5.22162e-13	0.000107026	0.000183951	1.38702e-11	8.98523e-14	2.37208e-13	1.9023e-08	4.90129e-07	5.18404e-15
120	0.000461578	0.000610068	0.00032348	9.9352e-09	0.000133091	5.42725e-07	1.81472e-12	1.65437e-57	0.000191275	5.40193e-13	0.000143869	0.0001851	1.43086e-11	9.24848e-14	2.46457e-13	1.91237e-08	7.17173e-07	5.83859e-15
121	0.000470954	0.000504215	0.000372995	7.49182e-09	0.000163657	5.99043e-07	1.85603e-12	8.2073e-57	0.00022865	5.59008e-13	0.000193957	0.000189151	1.47605e-11	9.51922e-14	2.56056e-13	1.92249e-08	1.03454e-06	6.79074e-15
122	0.000477776	0.00041122	0.000472966	1.06867e-08	0.000194349	8.1426e-07	1.89829e-12	4.02923e-56	0.000257592	5.78691e-13	0.000251228	0.000195419	1.52265e-11	9.79765e-14	2.66017e-13	1.93266e-08	1.47124e-06	8.22111e-15
123	0.000482162	0.000337184	0.000605811	2.18592e-08	0.000221678	1.1804e-06	1.94253e-12	1.95748e-55	0.000278497	5.99348e-13	0.000305456	0.000202682	1.57067e-11	1.0084e-13	2.76354e-13	1.94288e-08	2.06267e-06	1.04188e-14
124	0.000484307	0.000282806	0.000754451	4.90533e-08	0.000242244	1.72881e-06	2.01429e-12	9.41077e-55	0.000302925	6.21108e-13	0.000344626	0.000210417	1.62018e-11	1.03785e-13	2.8708e-13	1.95315e-08	2.85092e-06	1.38437e-14
125	0.000484446	0.000245734	0.00090148	1.10964e-07	0.000253323	2.52012e-06	2.63463e-12	4.4772e-54	0.000354848	6.44135e-13	0.0003588	0.000219708	1.67122e-11	1.06813e-13	2.9821e-13	1.96346e-08	3.88466e-06	1.92242e-14
126	0.000482827	0.000222958	0.00102933	2.472e-07	0.000253389	3.64289e-06	1.24935e-11	2.10786e-53	0.000452817	6.68634e-13	0.000343775	0.000231631	1.72383e-11	1.09926e-13	3.09758e-13	1.97383e-08	5.21832e-06	2.77067e-14
127	0.000479693	0.000212321	0.00112184	5.37192e-07	0.000242419	5.2176e-06	1.49756e-10	9.82042e-53	0.000574532	6.94865e-13	0.000302705	0.000242955	1.77805e-11	1.13128e-13	3.2174e-13	1.98425e-08	6.91066e-06	4.1097e-14
128	0.000475278	0.000212993	0.00116671	1.1323e-06	0.000221894	7.40432e-06	1.72173e-09	4.52764e-52	0.000647347	7.23158e-13	0.000244782	0.000244857	1.83395e-11	1.16421e-13	3.34171e-13	1.99472e-08	9.02234e-06	6.26807e-14
129	0.000469801	0.000225192	0.00115779	2.30607e-06	0.000194494	1.04138e-05	1.64628e-08	2.06582e-51	0.000604365	7.53938e-13	0.000181717	0.000229994	1.89156e-11	1.19806e-13	3.47068e-13	2.00524e-08	1.16126e-05	1.18054e-13
130	0.000463484	0.00024954	0.00109635	4.5259e-06	0.000163585	1.45224e-05	1.295e-07	9.56539e-51	0.000455355	7.87749e-13	0.000123817	0.000201431	1.95094e-11	1.23287e-13	3.60447e-13	2.01581e-08	1.4735e-05	9.46332e-13
131	0.000456557	0.000286344	0.000990753	8.5443e-06	0.000132625	2.00912e-05	8.37282e-07	3.91049e-49	0.000279176	8.25301e-13	7.74273e-05	0.000171202	2.01214e-11	1.26866e-13	3.74325e-13	2.02643e-08	1.84324e-05	2.1343e-11
132	0.000449269	0.000334999	0.000854589	1.54979e-05	0.000104668	2.75925e-05	4.44908e-06	4.00816e-46	0.000148006	8.67519e-13	4.44355e-05	0.000150034	2.07522e-11	1.30546e-13	3.88722e-13	2.0371e-08	2.27313e-05	4.14608e-10
133	0.000441903	0.00039368	0.000703841	2.6988e-05	8.20467e-05	3.76526e-05	1.94294e-05	3.60339e-43	8.00056e-05	9.1563e-13	2.34051e-05	0.000141143	2.14024e-11	1.34329e-13	4.03655e-13	2.04783e-08	2.76361e-05	6.01716e-09
134	0.00043477	0.000459426	0.000553863	4.51014e-05	6.62875e-05	5.1134e-05	6.97334e-05	2.5421e-40	5.56849e-05	9.71273e-13	1.13159e-05	0.00014278	2.20724e-11	1.38219e-13	4.19144e-13	2.05861e-08	3.31239e-05	6.46446e-08
135	0.000428213	0.000528619	0.000416961	7.23201e-05	5.82444e-05	6.93217e-05	0.00020569	1.40667e-37	5.16692e-05	1.03667e-12	5.02326e-06	0.000153189	2.27629e-11	1.42218e-13	4.35209e-13	2.06944e-08	3.91396e-05	5.13696e-07
136	0.000422588	0.00059772	0.00030107	0.000111278	5.84345e-05	9.43216e-05	0.000498626	6.10534e-35	5.48087e-05	1.11488e-12	2.04847e-06	0.000172551	2.34746e-11	1.4633e-13	4.5187e-13	2.08032e-08	4.55933e-05	3.01898e-06
137	0.000418258	0.000663999	0.000209594	0.000164356	6.76001e-05	0.000129792	0.000993408	2.07847e-32	6.01155e-05	1.21014e-12	7.68215e-07	0.000201726	2.42079e-11	1.50556e-13	4.69149e-13	2.09126e-08	5.23597e-05	1.31216e-05
138	0.000415565	0.000725953	0.00014217	0.000233162	8.74959e-05	0.000181981	0.00162656	5.55005e-30	6.60567e-05	1.32845e-12	2.65556e-07	0.000239784	2.49637e-11	1.54901e-13	4.87069e-13	2.10225e-08	5.92794e-05	4.21776e-05
139	0.000414819	0.000783225	9.59277e-05	0.000318035	0.000121674	0.000260557	0.0021888	1.16243e-27	7.21254e-05	1.47842e-12	8.50876e-08	0.000282871	2.57425e-11	1.59368e-13	5.05651e-13	2.11329e-08	6.6164e-05	0.000100267
140	0.000416274	0.000836056	6.67899e-05	0.000417727	0.000175516	0.000377968	0.00242064	1.90965e-25	7.80851e-05	1.67248e-12	2.5655e-08	0.000326321	2.65451e-11	1.6396e-13	5.24919e-13	2.12439e-08	7.28031e-05	0.000176296
141	0.000420117	0.000884541	5.05348e-05	0.000529447	0.000254332	0.000545534	0.00220012	2.46069e-23	8.38129e-05	1.92886e-12	7.61957e-09	0.000368573	2.73721e-11	1.68679e-13	5.44899e-13	2.13554e-08	7.89749e-05	0.000229321
142	0.000426458	0.000928135	4.34667e-05	0.000649296	0.000358961	0.000765426	0.00164344	2.48702e-21	8.93193e-05	2.27445e-12	2.55136e-09	0.000412257	2.82242e-11	1.73531e-13	5.65615e-13	2.14675e-08	8.44576e-05	0.000220881
143	0.000435325	0.000965772	4.27168e-05	0.000772963	0.000480517	0.0010211	0.00100891	1.9716e-19	9.48589e-05	2.7492e-12	1.24914e-09	0.000460228	2.91023e-11	1.78518e-13	5.87094e-13	2.15801e-08	8.90429e-05	0.000158185
144	0.000446668	0.000996707	4.62693e-05	0.000896385	0.000598509	0.00127329	0.000509026	1.22596e-17	0.000101124	3.41273e-12	9.98347e-10	0.000510404	3.0007e-11	1.83644e-13	6.09363e-13	2.16933e-08	9.25487e-05	8.60237e-05
145	0.000460362	0.00102164	5.28304e-05	0.00101602	0.000686306	0.00146915	0.000211066	5.97928e-16	0.000109484	4.35424e-12	1.06881e-09	0.000555167	3.09393e-11	1.88912e-13	6.32449e-13	2.1807e-08	9.48314e-05	3.98625e-05
146	0.000476223	0.00104322	6.16416e-05	0.00112854	0.000723015	0.00156457	7.19264e-05	2.28739e-14	0.000122134	5.70727e-12	1.2914e-09	0.000586177	3.18998e-11	1.94328e-13	6.56382e-13	2.19213e-08	9.57955e-05	2.44911e-05
147	0.000494015	0.00106508	7.22985e-05	0.00123018	0.000704685	0.00154691	2.01441e-05	6.86356e-13	0.000141919	7.67169e-12	1.65325e-09	0.000600074	3.28894e-11	1.99893e-13	6.81191e-13	2.20362e-08	9.54e-05	2.9172e-05
148	0.000513466	0.00108916	8.46076e-05	0.00131617	0.000646654	0.00144128	4.63661e-06	1.61538e-11	0.000171551	1.05461e-11	2.19568e-09	0.000600207	3.3909e-11	2.05613e-13	7.06909e-13	2.21516e-08	9.36618e-05	4.45864e-05
149	0.000534279	0.00111276	9.84845e-05	0.00138079	0.000575182	0.00129508	8.77089e-07	2.98208e-10	0.000212187	1.47753e-11	2.99496e-09	0.000593527	3.49594e-11	2.11492e-13	7.33566e-13	2.22676e-08	9.06541e-05	6.5887e-05
150	0.000556135	0.00112764	0.000113888	0.0014185	0.000514564	0.00115379	1.3636e-07	4.31797e-09	0.000261753	2.10197e-11	4.16624e-09	0.000585879	3.60417e-11	2.17534e-13	7.61195e-13	2.23843e-08	8.65015e-05	8.95804e-05
151	0.000578702	0.00112286	0.000130783	0.00142559	0.000478187	0.00104707	1.74256e-08	4.90409e-08	0.000313947	3.02556e-11	5.87603e-09	0.000579549	3.71566e-11	2.23743e-13	7.89832e-13	2.25015e-08	8.1371e-05	0.000111598
152	0.000601637	0.00109058	0.000149111	0.00140184	0.000467298	0.000991178	1.83312e-09	4.36872e-07	0.000358926	4.39192e-11	8.3612e-09	0.000574251	3.83052e-11	2.30124e-13	8.19512e-13	2.26193e-08	7.54618e-05	0.000127641
153	0.000624576	0.00103123	0.000168786	0.00135124	0.000475203	0.00099442	1.61659e-10	3.05264e-06	0.000386	6.41126e-11	1.19547e-08	0.000569277	3.94885e-11	2.36681e-13	8.5027e-13	2.27379e-08	6.89915e-05	0.000134658
154	0.000647139	0.000954461	0.00018968	0.0012813	0.000492428	0.00104842	1.50643e-11	1.6736e-05	0.000387473	9.38951e-11	1.71201e-08	0.00056373	4.07075e-11	2.4342e-13	8.82145e-13	2.28571e-08	6.21834e-05	0.000132191
155	0.000668922	0.000874776	0.000211623	0.00120126	0.000510162	0.00111124	4.60564e-12	7.22081e-05	0.000361779	1.37693e-10	2.44956e-08	0.000555034	4.19632e-11	2.50344e-13	9.15177e-13	2.2977e-08	5.52541e-05	0.000122716
156	0.000689503	0.000804793	0.000234401	0.00111989	0.000521796	0.00111464	4.07201e-12	0.000249834	0.000314234	2.01871e-10	3.4952e-08	0.000539643	4.32567e-11	2.57459e-13	9.49405e-13	2.30977e-08	4.84024e-05	0.000110664
157	0.000708441	0.000750109	0.000257758	0.00104369	0.000523497	0.00100997	4.13164e-12	0.000738181	0.000255004	2.95525e-10	4.96648e-08	0.000518688	4.45891e-11	2.6477e-13	9.84871e-13	2.32193e-08	4.18005e-05	0.000100628
158	0.00072529	0.000708395	0.000281398	0.000976053	0.000514421	0.000811575	4.22204e-12	0.00199476	0.000195503	4.31567e-10	7.02044e-08	0.000506076	4.59615e-11	2.72282e-13	1.02162e-12	2.3342e-08	3.55889e-05	9.5625e-05
159	0.000739618	0.000672201	0.000304989	0.000917453	0.000496551	0.000585821	4.31556e-12	0.00453322	0.000145151	6.28208e-10	9.86463e-08	0.000522136	4.73752e-11	2.80001e-13	1.0597e-12	2.34658e-08	2.98735e-05	9.62008e-05
160	0.000751022	0.000633163	0.000328173	0.000866356	0.000473914	0.000397339	4.41112e-12	0.00715079	0.000109912	9.10959e-10	1.37705e-07	0.000546044	4.88313e-11	2.87932e-13	1.09917e-12	2.3591e-08	2.47265e-05	0.000100604
161	0.000759154	0.000585359	0.000350572	0.000820326	0.000451144	0.000271073	4.50872e-12	0.00699031	9.2663e-05	1.31531e-09	1.90889e-07	0.00051334	5.03311e-11	2.9608e-13	1.14011e-12	2.37179e-08	2.01916e-05	0.000105757
162	0.000763747	0.000526811	0.000371798	0.000776983	0.000431763	0.00019723	4.60842e-12	0.00428521	9.43703e-05	1.8903e-09	2.62687e-07	0.000428371	5.18758e-11	3.04452e-13	1.18272e-12	2.38469e-08	1.62939e-05	0.000108498
163	0.000764628	0.000459302	0.000391465	0.00073461	0.000416805	0.000155622	4.71024e-12	0.00188693	0.000114751	2.7032e-09	3.58771e-07	0.000355957	5.34668e-11	3.13053e-13	1.22746e-12	2.39786e-08	1.30578e-05	0.000106594
164	0.000761742	0.000387182	0.000409197	0.000692377	0.00040439	0.000131272	4.81424e-12	0.000720291	0.000151771	3.84565e-09	4.86224e-07	0.000316041	5.51054e-11	3.21889e-13	1.27575e-12	2.41137e-08	1.05353e-05	9.92772e-05
165	0.00075515	0.000315838	0.000424648	0.000650286	0.00039047	0.000116648	4.92046e-12	0.000249997	0.000200396	5.44158e-09	6.53786e-07	0.000294661	5.67929e-11	3.30967e-13	1.33177e-12	2.42532e-08	8.84945e-06	8.72299e-05
166	0.000745036	0.000250322	0.000437502	0.000608944	0.000370484	0.000108608	5.02895e-12	7.29384e-05	0.000251864	7.65736e-09	8.72107e-07	0.000280957	5.85309e-11	3.40293e-13	1.40777e-12	2.43985e-08	8.2503e-06	7.21568e-05
167	0.000731691	0.000194401	0.000447494	0.000569274	0.000341243	0.000105808	5.13974e-12	1.69618e-05	0.000294725	1.07147e-08	1.15399e-06	0.000269409	6.03208e-11	3.49873e-13	1.53879e-12	2.45513e-08	9.1782e-06	5.61591e-05
168	0.000715503	0.000150138	0.000454411	0.00053224	0.000302247	0.000107535	5.2529e-12	3.10069e-06	0.000317918	1.4907e-08	1.51464e-06	0.000256937	6.2164e-11	3.59715e-13	1.82245e-12	2.47138e-08	1.23095e-05	4.11411e-05
169	0.000696933	0.000117932	0.000458107	0.000498618	0.000255968	0.000113313	5.36846e-12	4.44677e-07	0.000314664	2.06193e-08	1.97181e-06	0.000242321	6.40622e-11	3.69825e-13	2.52266e-12	2.48893e-08	1.85469e-05	2.84196e-05
170	0.000676491	9.68944e-05	0.0004585	0.00046886	0.000207066	0.000122755	5.48648e-12	5.00212e-08	0.000285139	2.83532e-08	2.54598e-06	0.000225864	6.60169e-11	3.8021e-13	4.33213e-12	2.50817e-08	2.89077e-05	1.85974e-05
171	0.000654717	8.53535e-05	0.000455584	0.000443019	0.000161003	0.000135482	5.60701e-12	4.41347e-09	0.000236319	3.87576e-08	3.26039e-06	0.000208898	6.80297e-11	3.90877e-13	9.01532e-12	2.52962e-08	4.42752e-05	1.16619e-05
172	0.000632157	8.13308e-05	0.000449419	0.000420769	0.000122669	0.00015107	5.7301e-12	3.05439e-10	0.000179075	5.26645e-08	4.14092e-06	0.000193166	7.01025e-11	4.01834e-13	2.09327e-11	2.55397e-08	6.5026e-05	7.20465e-06
173	0.000609345	8.28951e-05	0.00044014	0.000401469	9.55392e-05	0.000169021	5.85579e-12	1.658e-11	0.000124097	7.11331e-08	5.21593e-06	0.000180193	7.22368e-11	4.13088e-13	5.05369e-11	2.58209e-08	9.06166e-05	4.65602e-06
174	0.000586794	8.83609e-05	0.000427943	0.000384277	8.15699e-05	0.000188765	5.98416e-12	7.05934e-13	7.87138e-05	9.55006e-08	6.51582e-06	0.000170882	7.44344e-11	4.24648e-13	1.22129e-10	2.6151e-08	0.000119285	3.46348e-06
175	0.000564985	9.63572e-05	0.000413081	0.000368284	8.17478e-05	0.000209673	6.11524e-12	2.35754e-14	4.57835e-05	1.27441e-07	8.07246e-06	0.000165447	7.66972e-11	4.3652e-13	2.90485e-10	2.65446e-08	0.000148042	3.18874e-06
176	0.000544361	0.000105811	0.000395859	0.000352643	9.70044e-05	0.000231091	6.24909e-12	6.17552e-16	2.45099e-05	1.69035e-07	9.9184e-06	0.000163648	7.90271e-11	4.48714e-13	6.75294e-10	2.70202e-08	0.000173081	3.53522e-06
177	0.000525328	0.000115893	0.000376619	0.00033668	0.000129081	0.000252381	6.38578e-12	1.26883e-17	1.21651e-05	2.22844e-07	1.20858e-05	0.000165125	8.1426e-11	4.61238e-13	1.52999e-09	2.7601e-08	0.000190549	4.33289e-06
178	0.000508248	0.000125956	0.000355728	0.000319973	0.000180808	0.000272951	6.52535e-12	2.04482e-19	5.679e-06	2.91993e-07	1.46054e-05	0.00016965	8.38959e-11	4.741e-13	3.37441e-09	2.83167e-08	0.000197509	5.50648e-06
179	0.00049344	0.00013549	0.000333572	0.000302389	0.000255213	0.000292293	6.66787e-12	2.58775e-21	2.56234e-06	3.80269e-07	1.75047e-05	0.000177147	8.64389e-11	4.87309e-13	7.2412e-09	2.92045e-08	0.000192732	7.04413e-06
180	0.000481179	0.000144091	0.000310539	0.000284078	0.000353146	0.00030999	6.81339e-12	3.36643e-23	1.17023e-06	4.92209e-07	2.08068e-05	0.00018746	8.90569e-11	5.00874e-13	1.51159e-08	3.03108e-08	0.000177052	8.97418e-06
181	0.000471686	0.00015145	0.000287011	0.000265435	0.000470032	0.000325727	6.96199e-12	2.14745e-23	5.74646e-07	6.33209e-07	2.45286e-05	0.000199954	9.17523e-11	5.14805e-13	3.06921e-08	3.16938e-08	0.000153121	1.13511e-05
182	0.000465126	0.000157348	0.000263352	0.000247031	0.000593552	0.000339272	7.11371e-12	5.57335e-23	3.1753e-07	8.09617e-07	2.86791e-05	0.000213214	9.45271e-11	5.2911e-13	6.06139e-08	3.34251e-08	0.000124676	1.42489e-05
183	0.0004616	0.00016166	0.0002399	0.000229532	0.000704536	0.000350466	7.26863e-12	1.44476e-22	1.97407e-07	1.02883e-06	3.32579e-05	0.000225103	9.73837e-11	5.438e-13	1.16429e-07	3.55934e-08	9.55885e-05	1.77579e-05
184	0.000461137	0.000164359	0.00021696	0.000213613	0.000782077	0.000359195	7.42681e-12	3.70634e-22	1.33578e-07	1.2994e-06	3.82537e-05	0.000233308	1.00325e-10	5.58885e-13	2.17516e-07	3.83077e-08	6.90291e-05	2.19838e-05
185	0.000463689	0.000165515	0.000194797	0.000199887	0.000811077	0.000365371	7.58831e-12	9.4092e-22	9.54749e-08	1.63105e-06	4.36432e-05	0.000236182	1.03352e-10	5.74375e-13	3.95239e-07	4.17009e-08	4.69825e-05	2.70445e-05
186	0.000469127	0.000165292	0.000173637	0.000188842	0.000788184	0.00036892	7.7532e-12	2.36386e-21	7.13187e-08	2.0348e-06	4.93907e-05	0.000233401	1.06468e-10	5.9028e-13	6.98499e-07	4.59347e-08	3.01796e-05	3.30625e-05
187	0.000477242	0.000163935	0.000153659	0.000180807	0.000722562	0.000369776	7.92155e-12	5.87695e-21	5.59644e-08	2.52292e-06	5.54476e-05	0.000226041	1.09676e-10	6.06611e-13	1.20063e-06	5.12047e-08	1.83534e-05	4.01512e-05
188	0.000487751	0.000161758	0.000134998	0.000175932	0.000631168	0.000367885	8.09343e-12	1.44593e-20	4.6669e-08	3.10892e-06	6.17526e-05	0.000216043	1.12978e-10	6.23379e-13	2.00718e-06	5.77464e-08	1.06437e-05	4.8394e-05
189	0.00050031	0.000159122	0.000117748	0.0001742	0.000531629	0.000363222	8.26891e-12	3.52057e-20	4.17128e-08	3.80751e-06	6.82333e-05	0.000205406	1.16377e-10	6.40596e-13	3.26364e-06	6.58419e-08	5.98691e-06	5.78156e-05
190	0.000514533	0.000156413	0.000101961	0.000175439	0.000436788	0.000355832	8.44807e-12	8.48297e-20	3.99344e-08	4.63444e-06	7.48077e-05	0.000195568	1.19876e-10	6.58272e-13	5.16123e-06	7.5827e-08	3.39201e-06	6.83503e-05
191	0.000530025	0.000154024	8.7654e-05	0.000179352	0.000353041	0.000345956	8.63097e-12	2.02282e-19	4.05387e-08	5.6063e-06	8.13861e-05	0.000187245	1.23477e-10	6.7642e-13	7.93855e-06	8.81001e-08	2.07873e-06	7.98114e-05
192	0.000546408	0.000152326	7.48109e-05	0.000185559	0.000281862	0.000334439	8.81769e-12	4.77363e-19	4.29912e-08	6.7403e-06	8.78746e-05	0.000180651	1.27183e-10	6.95052e-13	1.18759e-05	1.03131e-07	1.50575e-06	9.18704e-05
193	0.000563366	0.00015166	6.33889e-05	0.000193626	0.000222423	0.000323799	9.00832e-12	1.11487e-18	4.69467e-08	8.05388e-06	9.41782e-05	0.000175926	1.30998e-10	7.14181e-13	1.72793e-05	1.21469e-07	1.33552e-06	0.000104054
194	0.000580675	0.000152317	5.33234e-05	0.000203103	0.000173579	0.000320196	9.20292e-12	2.57688e-18	5.21977e-08	9.5643e-06	0.000100205	0.000173594	1.34924e-10	7.33818e-13	2.44524e-05	1.43757e-07	1.37716e-06	0.000115767
195	0.000598227	0.000154537	4.45328e-05	0.000213552	0.000134674	0.000335132	9.40158e-12	5.89473e-18	5.86363e-08	1.12882e-05	0.000105868	0.000174858	1.38965e-10	7.53977e-13	3.36554e-05	1.7074e-07	1.53269e-06	0.000126337
196	0.000616037	0.000158506	3.69233e-05	0.000224574	0.000105493	0.000383065	9.60438e-12	1.33458e-17	6.62276e-08	1.32409e-05	0.000111092	0.000181321	1.43123e-10	7.74672e-13	4.50531e-05	2.03275e-07	1.75726e-06	0.000135091
197	0.000634219	0.000164367	3.03936e-05	0.000235823	8.59292e-05	0.000470824	9.8114e-12	2.99051e-17	7.49911e-08	1.54359e-05	0.000115815	0.000193736	1.47403e-10	7.95916e-13	5.86583e-05	2.42348e-07	2.03394e-06	0.000141436
198	0.000652932	0.000172225	2.48387e-05	0.000247023	7.57146e-05	0.000582403	1.00227e-11	6.63253e-17	8.49877e-08	1.78841e-05	0.000119991	0.000210224	1.51808e-10	8.17724e-13	7.42799e-05	2.8908e-07	2.35957e-06	0.000144945
199	0.000672291	0.000182171	2.01535e-05	0.000257968	7.4309e-05	0.00067483	1.02384e-11	1.456e-16	9.63137e-08	2.05933e-05	0.000123593	0.000225779	1.5634e-10	8.40109e-13	9.14849e-05	3.44741e-07	2.73788e-06	0.000145423
200	0.000692261	0.000194287	1.62353e-05	0.000268526	8.08863e-05	0.000699025	1.04586e-11	3.1638e-16	1.09098e-07	2.35672e-05	0.000126614	0.000234656	1.61005e-10	8.63086e-13	0.000109588	4.10762e-07	3.17647e-06	0.000142942
201	0.000712543	0.000208665	1.29862e-05	0.000278634	9.43489e-05	0.000634684	1.06834e-11	6.80519e-16	1.2351e-07	2.68047e-05	0.000129066	0.000234367	1.65805e-10	8.86671e-13	0.000127677	4.88743e-07	3.68574e-06	0.000137832
202	0.000732495	0.000225404	1.03151e-05	0.000288285	0.000113334	0.000506641	1.09128e-11	1.44903e-15	1.39771e-07	3.02995e-05	0.000130982	0.000227555	1.70744e-10	9.10878e-13	0.000144678	5.8046e-07	4.27889e-06	0.000130642
203	0.000751096	0.000244599	8.13789e-06	0.00029752	0.000136214	0.000365564	1.1147e-11	3.05452e-15	1.58187e-07	3.40396e-05	0.000132411	0.000219765	1.75827e-10	9.35725e-13	0.00015945	6.87875e-07	4.97218e-06	0.000122063
204	0.000766997	0.000266321	6.37917e-06	0.00030641	0.000161127	0.000253079	1.13861e-11	6.37477e-15	1.79207e-07	3.80064e-05	0.000133419	0.000215447	1.81057e-10	9.61226e-13	0.000170916	8.13136e-07	5.78543e-06	0.000112841
205	0.000778653	0.000290573	4.97184e-06	0.000315043	0.000186062	0.000183151	1.163e-11	1.31726e-14	2.03527e-07	4.21747e-05	0.00013408	0.000215825	1.86438e-10	9.87399e-13	0.000178188	9.58577e-07	6.74259e-06	0.00010369
206	0.000784533	0.000317239	3.85739e-06	0.000323506	0.000209008	0.000147978	1.1879e-11	2.69522e-14	2.32267e-07	4.65127e-05	0.000134479	0.000219614	1.91975e-10	1.01426e-12	0.00018068	1.12672e-06	7.87222e-06	9.52214e-05
207	0.000783359	0.000346033	2.98556e-06	0.000331874	0.000228167	0.000133267	1.21332e-11	5.46095e-14	2.67267e-07	5.0982e-05	0.0001347	0.000224812	1.97673e-10	1.04183e-12	0.000178188	1.32025e-06	9.20791e-06	8.78974e-05
208	0.000774348	0.00037645	2.31398e-06	0.0003402	0.000242185	0.000128058	1.23926e-11	1.0958e-13	3.11564e-07	5.55376e-05	0.000134828	0.000229874	2.03534e-10	1.07012e-12	0.000170916	1.54203e-06	1.07887e-05	8.20181e-05
209	0.000757385	0.000407744	1.80762e-06	0.000348507	0.000250357	0.000126554	1.26574e-11	2.17782e-13	3.70122e-07	6.01291e-05	0.000134938	0.000233959	2.09565e-10	1.09915e-12	0.00015945	1.79507e-06	1.26591e-05	7.77295e-05
210	0.000733091	0.000438936	1.43829e-06	0.000356787	0.000252749	0.000126309	1.29276e-11	4.28725e-13	4.50941e-07	6.47009e-05	0.000135098	0.000236748	2.1577e-10	1.12895e-12	0.000144678	2.08246e-06	1.48696e-05	7.50512e-05
211	0.000702777	0.000468862	1.18408e-06	0.000365005	0.000250217	0.000126372	1.32034e-11	8.36075e-13	5.66633e-07	6.91936e-05	0.000135362	0.000238229	2.22154e-10	1.15952e-12	0.000127677	2.40742e-06	1.74775e-05	7.39145e-05
212	0.000668273	0.000496265	1.02882e-06	0.000373101	0.000244307	0.000126331	1.34848e-11	1.61534e-12	7.36607e-07	7.35448e-05	0.000135766	0.000238571	2.28722e-10	1.1909e-12	0.000109588	2.77319e-06	2.05491e-05	7.42012e-05
213	0.000631693	0.000519921	9.61718e-07	0.000381008	0.000237052	0.000125991	1.3772e-11	3.09224e-12	9.89925e-07	7.76911e-05	0.000136332	0.000238055	2.35478e-10	1.22309e-12	9.14849e-05	3.18302e-06	2.41654e-05	7.57805e-05
214	0.000595156	0.000538776	9.76933e-07	0.00038866	0.000230725	0.000125296	1.40652e-11	5.86563e-12	1.36885e-06	8.15691e-05	0.000137063	0.000237028	2.42429e-10	1.25613e-12	7.42799e-05	3.64009e-06	2.84334e-05	7.854e-05
215	0.000560548	0.00055208	1.07336e-06	0.000396006	0.00022758	0.000124327	1.43643e-11	1.10262e-11	1.93299e-06	8.51175e-05	0.000137947	0.000235862	2.49579e-10	1.29003e-12	5.86583e-05	4.1475e-06	3.35055e-05	8.24126e-05
216	0.000529345	0.000559491	1.25449e-06	0.000403031	0.000229638	0.000123307	1.46696e-11	2.05419e-11	2.76364e-06	8.82782e-05	0.000138956	0.000234929	2.56935e-10	1.32481e-12	4.50531e-05	4.70812e-06	3.96102e-05	8.74027e-05
217	0.000502526	0.000561119	1.5283e-06	0.000409764	0.000238548	0.000122604	1.49811e-11	3.79304e-11	3.96789e-06	9.09984e-05	0.000140052	0.000234582	2.64502e-10	1.36049e-12	3.36554e-05	5.3246e-06	4.70912e-05	9.36113e-05
218	0.000480582	0.000557522	1.90736e-06	0.000416297	0.000255514	0.000122721	1.52991e-11	6.94206e-11	5.68151e-06	9.3232e-05	0.000141189	0.000235154	2.72285e-10	1.39711e-12	2.44524e-05	5.99925e-06	5.6447e-05	0.000101264
219	0.000463593	0.000549632	2.40893e-06	0.000422794	0.000281288	0.000124286	1.56235e-11	1.25939e-10	8.06963e-06	9.49409e-05	0.000142317	0.000236948	2.80292e-10	1.43467e-12	1.72793e-05	6.73397e-06	6.83534e-05	0.000110739
220	0.000451357	0.000538634	3.05512e-06	0.000429498	0.000316178	0.000128026	1.59545e-11	2.26468e-10	1.13239e-05	9.60963e-05	0.000143385	0.000240247	2.88527e-10	1.47321e-12	1.18759e-05	7.53014e-06	8.36405e-05	0.000122596
221	0.000443527	0.000525821	3.87317e-06	0.000436736	0.000360071	0.000134737	1.62923e-11	4.03672e-10	1.5655e-05	9.66796e-05	0.000144347	0.000245302	2.96998e-10	1.51276e-12	7.93855e-06	8.3886e-06	0.000103196	0.000137617
222	0.000439735	0.000512452	4.89565e-06	0.00044492	0.000412423	0.000145248	1.6637e-11	7.13205e-10	2.12794e-05	9.66833e-05	0.000145165	0.000252327	3.05711e-10	1.55332e-12	5.16124e-06	9.3095e-06	0.000127778	0.000156873
223	0.000439693	0.000499629	6.16071e-06	0.000454544	0.000472232	0.000160385	1.69888e-11	1.24894e-09	2.84006e-05	9.61111e-05	0.000145811	0.000261483	3.14672e-10	1.59494e-12	3.26364e-06	1.02923e-05	0.000157753	0.000181816
224	0.000443248	0.000488212	7.71223e-06	0.000466171	0.00053802	0.000180932	1.73477e-11	2.16761e-09	3.71848e-05	9.49785e-05	0.000146271	0.000272868	3.23889e-10	1.63763e-12	2.00719e-06	1.13355e-05	0.00019282	0.000214333
225	0.000450406	0.00047879	9.59996e-06	0.000480424	0.000607838	0.000207585	1.77139e-11	3.7281e-09	4.77345e-05	9.33127e-05	0.000146544	0.000286499	3.33369e-10	1.68142e-12	1.20063e-06	1.2437e-05	0.000231825	0.000256586
226	0.000461319	0.000471687	1.18794e-05	0.00049796	0.000679346	0.000240894	1.80876e-11	6.35348e-09	6.00614e-05	9.1153e-05	0.000146647	0.000302314	3.43118e-10	1.72634e-12	6.98507e-07	1.35935e-05	0.000272777	0.000310383
227	0.000476247	0.000467015	1.46118e-05	0.00051945	0.000749981	0.00028118	1.84688e-11	1.07274e-08	7.40639e-05	8.8551e-05	0.000146612	0.000320177	3.53145e-10	1.77243e-12	3.95248e-07	1.48009e-05	0.000313136	0.00037605
228	0.000495507	0.000464738	1.78632e-05	0.000545545	0.000817208	0.000328466	1.88579e-11	1.79419e-08	8.95143e-05	8.55736e-05	0.000146483	0.000339891	3.63457e-10	1.8197e-12	2.17526e-07	1.60542e-05	0.000350355	0.000451249
229	0.000519403	0.000464748	2.17044e-05	0.000576842	0.00087884	0.000382484	1.92549e-11	2.97208e-08	0.000106059	8.23069e-05	0.00014632	0.00036124	3.74062e-10	1.86818e-12	1.16439e-07	1.73472e-05	0.000382547	0.000530698
230	0.000548169	0.000466936	2.62098e-05	0.000613851	0.000933355	0.000442888	1.966e-11	4.87518e-08	0.000123234	7.88681e-05	0.000146192	0.000384043	3.84968e-10	1.91792e-12	6.06243e-08	1.86729e-05	0.000409072	0.000607631
231	0.000581899	0.000471256	3.14556e-05	0.000656957	0.000980164	0.00050977	2.00735e-11	7.9173e-08	0.0001405	7.5425e-05	0.000146175	0.000408253	3.96183e-10	1.96893e-12	3.0703e-08	2.00234e-05	0.000430835	0.000676745
232	0.000620508	0.00047779	3.75188e-05	0.000706394	0.00101978	0.000584347	2.04956e-11	1.27272e-07	0.000157288	7.22314e-05	0.000146351	0.000434057	4.07716e-10	2.02124e-12	1.51273e-08	2.13899e-05	0.00045017	0.000737036
233	0.000663689	0.000486814	4.4475e-05	0.00076222	0.00105382	0.000669284	2.09267e-11	2.02477e-07	0.000173057	6.9678e-05	0.000146807	0.000461936	4.19575e-10	2.0749e-12	7.25313e-09	2.27627e-05	0.000470326	0.000792605
234	0.000710898	0.000498911	5.23961e-05	0.000824306	0.0010849	0.000767759	2.13675e-11	3.18722e-07	0.000187355	6.83599e-05	0.000147629	0.000492565	4.3177e-10	2.12994e-12	3.3869e-09	2.41317e-05	0.000494718	0.000850741
235	0.000761355	0.000515089	6.13473e-05	0.000892338	0.00111639	0.000880775	2.18188e-11	4.96318e-07	0.000199867	6.91435e-05	0.000148903	0.000526506	4.4431e-10	2.18638e-12	1.54305e-09	2.54859e-05	0.000526141	0.000918489
236	0.00081406	0.000536903	7.1385e-05	0.000965825	0.00115215	0.00100366	2.22821e-11	7.64424e-07	0.000210459	7.32049e-05	0.000150714	0.000563801	4.57204e-10	2.24426e-12	6.8894e-10	2.68144e-05	0.000566147	0.000999807
237	0.000867815	0.000566446	8.25529e-05	0.00104412	0.00119618	0.00112439	2.27597e-11	1.16427e-06	0.000219189	8.19915e-05	0.000153149	0.000603743	4.70461e-10	2.30363e-12	3.04728e-10	2.81055e-05	0.000614707	0.00109468
238	0.000921264	0.000606077	9.48794e-05	0.00112642	0.00125229	0.00122632	2.32557e-11	1.75323e-06	0.000226301	9.70563e-05	0.000156293	0.000645108	4.84092e-10	2.3645e-12	1.36983e-10	2.93479e-05	0.00067016	0.00120003
239	0.000972924	0.000657746	0.000108374	0.00121184	0.0013237	0.00129512	2.37769e-11	2.60986e-06	0.000232196	0.000119734	0.000160237	0.00068679	4.98108e-10	2.42693e-12	6.60188e-11	3.05302e-05	0.000729425	0.00131133
240	0.00102123	0.000721945	0.000123025	0.00129934	0.00141238	0.00132578	2.43345e-11	3.83988e-06	0.000237381	0.00015068	0.000165078	0.000728363	5.12518e-10	2.49095e-12	3.7058e-11	3.16414e-05	0.000788406	0.0014239
241	0.00106458	0.000796571	0.000138796	0.00138782	0.0015183	0.00132465	2.49477e-11	5.58308e-06	0.000242409	0.00018938	0.000170922	0.000770037	5.27333e-10	2.55659e-12	2.58009e-11	3.2671e-05	0.000842559	0.00153367
242	0.00110137	0.000876257	0.000155623	0.00147604	0.00163879	0.00130478	2.56484e-11	8.02093e-06	0.000247826	0.000233796	0.000177885	0.000811932	5.42565e-10	2.6239e-12	2.17953e-11	3.36092e-05	0.000887579	0.00163739
243	0.00113012	0.000952761	0.000173414	0.00156265	0.00176859	0.0012781	2.64892e-11	1.13845e-05	0.000254117	0.000280344	0.000186094	0.000853225	5.58225e-10	2.69293e-12	2.06819e-11	3.44472e-05	0.000920142	0.0017329
244	0.00114947	0.00101665	0.000192047	0.00164617	0.00190172	0.0012499	2.75571e-11	1.59622e-05	0.000261678	0.000324345	0.000195684	0.000891985	5.74323e-10	2.7637e-12	2.06976e-11	3.51772e-05	0.000938596	0.00181927
245	0.00115836	0.00105989	0.000211372	0.00172503	0.00203516	0.00121894	2.89945e-11	2.2106e-05	0.000270809	0.000360903	0.000206791	0.000926006	5.90874e-10	2.83626e-12	2.11537e-11	3.57926e-05	0.000943442	0.00189687
246	0.0011561	0.00107835	0.000231207	0.00179755	0.00217299	0.00118159	3.10322e-11	3.02361e-05	0.000281723	0.000386022	0.000219544	0.000954186	6.07888e-10	2.91066e-12	2.17974e-11	3.62883e-05	0.000937457	0.00196699
247	0.00114248	0.0010731	0.000251343	0.00186207	0.0023259	0.00113669	3.40425e-11	4.08417e-05	0.000294583	0.000397597	0.000234047	0.000977315	6.25378e-10	2.98694e-12	2.25648e-11	3.66607e-05	0.000925371	0.00203097
248	0.00111784	0.00104992	0.000271549	0.00191699	0.00250174	0.00108806	3.86207e-11	5.44767e-05	0.000309534	0.000395957	0.000250364	0.000997319	6.43357e-10	3.06515e-12	2.35242e-11	3.69077e-05	0.000913086	0.00208909
249	0.00108308	0.0010173	0.000291571	0.00196091	0.0026904	0.00104397	4.57115e-11	7.17494e-05	0.000326741	0.000383744	0.000268497	0.00101524	6.61839e-10	3.14533e-12	2.49695e-11	3.7029e-05	0.000906557	0.00213981
250	0.00103967	0.000983745	0.000311138	0.00199275	0.00285782	0.00101439	5.68025e-11	9.33043e-05	0.000346399	0.000365186	0.000288365	0.00102987	6.80838e-10	3.22754e-12	2.77771e-11	3.70259e-05	0.000910513	0.00217973
251	0.000989523	0.000955726	0.000329972	0.00201184	0.00296245	0.00100775	7.42186e-11	0.000119796	0.000368718	0.000345015	0.000309789	0.00103888	7.00366e-10	3.31181e-12	3.43892e-11	3.69013e-05	0.000927291	0.00220454
252	0.000934888	0.000936725	0.000347789	0.00201807	0.00298478	0.00102824	1.01564e-10	0.000151853	0.000393865	0.000327396	0.000332478	0.00104163	7.20438e-10	3.3982e-12	5.1352e-11	3.66599e-05	0.000956102	0.0022106
253	0.00087814	0.000927502	0.000364307	0.00201183	0.00294191	0.00107475	1.44382e-10	0.000190035	0.000421872	0.000315178	0.000356028	0.00104061	7.4107e-10	3.48676e-12	9.55814e-11	3.63081e-05	0.0009932	0.00219633
254	0.000821605	0.000927055	0.000379257	0.00199408	0.00287186	0.00114115	2.11134e-10	0.000234783	0.00045252	0.000309622	0.000379927	0.00103973	7.62276e-10	3.57755e-12	2.09224e-10	3.58535e-05	0.00103361	0.00216286
255	0.000767378	0.000933647	0.000392386	0.00196623	0.00280435	0.00121782	3.14631e-10	0.000286363	0.000485222	0.000310566	0.000403581	0.00104127	7.84072e-10	3.67061e-12	4.93497e-10	3.53052e-05	0.00107495	0.00211349
256	0.000717171	0.000945531	0.000403467	0.00193	0.00274563	0.00129381	4.74343e-10	0.000344814	0.000518944	0.000316863	0.000426343	0.00104454	8.06474e-10	3.76601e-12	1.18262e-09	3.46737e-05	0.00112186	0.00205249
257	0.000672222	0.000961229	0.000412303	0.00188732	0.00268505	0.00135904	7.52201e-10	0.000409898	0.000552192	0.0003269	0.000447559	0.00104688	8.29498e-10	3.86379e-12	2.79866e-09	3.39702e-05	0.0011854	0.00198372
258	0.000633255	0.000979488	0.000418735	0.0018401	0.00261009	0.00140617	3.87409e-09	0.000481058	0.000583086	0.000339039	0.000466612	0.00104567	8.5316e-10	3.96402e-12	6.46186e-09	3.32071e-05	0.00127114	0.00190969
259	0.000600485	0.000999084	0.000422646	0.0017901	0.00251581	0.00143174	1.27824e-07	0.000557393	0.000609534	0.000351892	0.000482975	0.00103951	8.77479e-10	4.06675e-12	1.44854e-08	3.23972e-05	0.00136256	0.00183148
260	0.00057368	0.00101864	0.000423963	0.0017388	0.00240583	0.00143627	3.15994e-06	0.000637653	0.000629479	0.00036444	0.000496252	0.00102849	9.02471e-10	4.17205e-12	3.14624e-08	3.15539e-05	0.00142318	0.00174928
261	0.000552237	0.00103653	0.000422662	0.00168734	0.00228891	0.00142356	4.36418e-05	0.000720255	0.000641184	0.000376031	0.000506212	0.00101439	9.28155e-10	4.27997e-12	6.61576e-08	3.06908e-05	0.00142735	0.00166312
262	0.000535288	0.00105091	0.000418767	0.00163643	0.00217523	0.00139923	0.000333092	0.000803325	0.000643488	0.000386306	0.000512808	0.00100383	9.5455e-10	4.39058e-12	1.34628e-07	2.98214e-05	0.00138852	0.0015735
263	0.0005218	0.00105989	0.000412376	0.00158645	0.00207416	0.00136918	0.00140415	0.000884767	0.000635999	0.000395098	0.000516174	0.00101141	9.81674e-10	4.50394e-12	2.65091e-07	2.89592e-05	0.00134672	0.00148163
264	0.000510672	0.00106171	0.000404152	0.00153746	0.00199326	0.00133817	0.00326913	0.000962347	0.000619149	0.000402344	0.000516614	0.00103857	1.00955e-09	4.62011e-12	5.0504e-07	2.81172e-05	0.00132785	0.00138923
265	0.000500823	0.00105499	0.000401549	0.00148928	0.00193823	0.00130905	0.00420353	0.0010338	0.000594143	0.000408009	0.000514566	0.00104342	1.03819e-09	4.73917e-12	9.3092e-07	2.73078e-05	0.0013226	0.00129824
266	0.000491263	0.00103902	0.000460316	0.00144163	0.00191259	0.00128259	0.00298511	0.00109696	0.00056278	0.000412039	0.000510561	0.000997447	1.06762e-09	4.86119e-12	1.66016e-06	2.65427e-05	0.00130193	0.0012104
267	0.000481146	0.00101385	0.000806057	0.00139419	0.00191665	0.00125779	0.0011708	0.00114984	0.000527223	0.00041434	0.000505173	0.000945195	1.09786e-09	4.98623e-12	2.86439e-06	2.58326e-05	0.0012444	0.00112702
268	0.000469808	0.00098044	0.00182275	0.0013467	0.0019456	0.00123248	0.000253893	0.00119078	0.00048975	0.000414776	0.000498972	0.000933043	1.12894e-09	5.11436e-12	4.78147e-06	2.51873e-05	0.00114923	0.0010489
269	0.000456789	0.000940613	0.00334545	0.00129899	0.0019879	0.00120402	3.5413e-05	0.00121852	0.000452571	0.000413194	0.00049248	0.000950717	1.16087e-09	5.24566e-12	7.72208e-06	2.46154e-05	0.00103218	0.000976399
270	0.000441837	0.000896949	0.00408576	0.00125106	0.00202574	0.00116996	6.01985e-05	0.00123227	0.000417727	0.000409457	0.00048614	0.000952635	1.19367e-09	5.38021e-12	1.20657e-05	2.41242e-05	0.000914286	0.000909556
271	0.000424899	0.000852585	0.00318441	0.00120302	0.00203887	0.00112852	0.000387203	0.00123175	0.0003871	0.000403483	0.000480289	0.000916731	1.22738e-09	5.51807e-12	1.82394e-05	2.37198e-05	0.000812359	0.000848258
272	0.000406103	0.000810951	0.00162898	0.00115516	0.00201139	0.00107896	0.00147847	0.00121722	0.000362522	0.000395285	0.000475152	0.000878251	1.26201e-09	5.65934e-12	2.66757e-05	2.34069e-05	0.000734985	0.000792336
273	0.00038572	0.00077547	0.000641388	0.00110785	0.00193859	0.00102166	0.00323818	0.00118945	0.000345904	0.000385001	0.00047084	0.000865922	1.2976e-09	5.80408e-12	3.77453e-05	2.3189e-05	0.000683132	0.000741626
274	0.000364132	0.000749231	0.00029991	0.00106157	0.0018302	0.000958098	0.00406688	0.00114968	0.000339309	0.000372907	0.000467367	0.000843978	1.33415e-09	5.95238e-12	5.16718e-05	2.3068e-05	0.000652932	0.000695988
275	0.000341786	0.000734664	0.000218878	0.00101684	0.00170778	0.000890571	0.00292888	0.00109956	0.000344834	0.000359408	0.000464664	0.000780367	1.37171e-09	6.10433e-12	6.84365e-05	2.30448e-05	0.00063838	0.000655299
276	0.000319158	0.00073322	0.000192653	0.000974208	0.00159682	0.000821793	0.00120987	0.00104112	0.000364198	0.000345013	0.0004626	0.000708199	1.41029e-09	6.26001e-12	8.76932e-05	2.31189e-05	0.000632979	0.00061943
277	0.000296709	0.000745111	0.00017355	0.000934193	0.00151731	0.000754484	0.000287293	0.000976621	0.000398026	0.000330299	0.000461006	0.000663454	1.44993e-09	6.41951e-12	0.000108715	2.32886e-05	0.000630498	0.000588211
278	0.000274863	0.000769137	0.000155738	0.000897271	0.00147693	0.000691001	4.02821e-05	0.000908578	0.000444974	0.000315852	0.000459697	0.000644003	1.49065e-09	6.58292e-12	0.000130393	2.3551e-05	0.00062539	0.000561385
279	0.000253977	0.000802655	0.000138912	0.000863836	0.00146962	0.000633105	5.05062e-06	0.00083964	0.000501031	0.00030222	0.000458489	0.000637157	1.53249e-09	6.75032e-12	0.000151309	2.39025e-05	0.000613241	0.000538549
280	0.000234333	0.000841759	0.000123145	0.000834176	0.00147945	0.000581882	3.24896e-06	0.000772557	0.000559429	0.000289863	0.000457215	0.000635598	1.57546e-09	6.92182e-12	0.000169872	2.43384e-05	0.000591273	0.000519087
281	0.000216127	0.000881656	0.000108504	0.000808447	0.0014872	0.000537807	5.38527e-06	0.000710117	0.000611471	0.000279119	0.000455738	0.000634877	1.6196e-09	7.09751e-12	0.000184512	2.48531e-05	0.00055873	0.000502132
282	0.000199478	0.000917238	9.50276e-05	0.000786651	0.0014768	0.000500889	1.04813e-05	0.000655077	0.000648256	0.000270183	0.000453955	0.000631455	1.66495e-09	7.27749e-12	0.000193899	2.54405e-05	0.000516948	0.000486566
283	0.000184434	0.000943754	8.27333e-05	0.000768626	0.00143918	0.000470848	2.19407e-05	0.000610069	0.00066284	0.000263103	0.000451804	0.000622923	1.71153e-09	7.46185e-12	0.000197142	2.6094e-05	0.000469059	0.000471098
284	0.000170981	0.000957473	7.16179e-05	0.000754041	0.00137286	0.000447276	4.64153e-05	0.000577475	0.000652073	0.000257792	0.000449265	0.000608382	1.75937e-09	7.6507e-12	0.000193929	2.68065e-05	0.000419357	0.000454417
285	0.00015906	0.00095619	6.16623e-05	0.0007424	0.00128222	0.000429747	9.47738e-05	0.000559255	0.000617398	0.00025405	0.000446359	0.000588446	1.80852e-09	7.84414e-12	0.000184575	2.75707e-05	0.000372523	0.000435404
286	0.000148581	0.00093949	5.28356e-05	0.000733069	0.00117466	0.000417864	0.000181898	0.000556749	0.000564289	0.000251595	0.000443142	0.000564885	1.85899e-09	8.04229e-12	0.000169977	2.83789e-05	0.000332879	0.000413335
287	0.000139438	0.000908701	4.50995e-05	0.000725306	0.00105822	0.000411277	0.000323691	0.000570454	0.000500609	0.000250098	0.000439705	0.000540055	1.91084e-09	8.24524e-12	0.000151468	2.92238e-05	0.000303811	0.000388048
288	0.000131516	0.000866582	3.84128e-05	0.000718308	0.000940059	0.000409658	0.000530418	0.000599816	0.000434539	0.000249211	0.000436165	0.000516251	1.9641e-09	8.45312e-12	0.000130626	3.0098e-05	0.000287462	0.000359982
289	0.000124704	0.000816807	3.2736e-05	0.000711262	0.000825847	0.000412661	0.000797622	0.000643078	0.000372833	0.000248596	0.000432654	0.000495123	2.0188e-09	8.66604e-12	0.000109047	3.09942e-05	0.000284646	0.000330104
290	0.0001189	0.000763387	2.80361e-05	0.000703404	0.000719725	0.000419895	0.00109882	0.000697222	0.000319863	0.000247947	0.000429318	0.000477295	2.07498e-09	8.8841e-12	8.81596e-05	3.19059e-05	0.000294923	0.00029972
291	0.000114018	0.000710126	2.42915e-05	0.000694073	0.000624418	0.00043088	0.00138568	0.000758056	0.000277529	0.000247003	0.000426303	0.000462314	2.13269e-09	9.10744e-12	6.90834e-05	3.28266e-05	0.00031673	0.000270232
292	0.000109986	0.000660217	2.1496e-05	0.000682757	0.000541372	0.000445026	0.00159928	0.000820453	0.000245772	0.000245556	0.000423749	0.000448979	2.19197e-09	9.33617e-12	5.2559e-05	3.37508e-05	0.000347508	0.000242905
293	0.000106753	0.000616012	1.96638e-05	0.000669126	0.000470916	0.000461611	0.00168979	0.000878758	0.000223328	0.000243457	0.00042178	0.000435929	2.25287e-09	9.57042e-12	3.89494e-05	3.46739e-05	0.000383824	0.000218698
294	0.000104284	0.000578961	1.88327e-05	0.000653047	0.000412465	0.000479771	0.00163604	0.00092731	0.000208418	0.000240608	0.000420499	0.000422251	2.31543e-09	9.81031e-12	2.82932e-05	3.5592e-05	0.00042154	0.000198191
295	0.000102565	0.000549689	1.9068e-05	0.000634583	0.000364798	0.000498491	0.00145428	0.000961023	0.000199228	0.000236965	0.000419981	0.000407817	2.37972e-09	1.0056e-11	2.03905e-05	3.65031e-05	0.000456121	0.000181604
296	0.000101595	0.000528166	2.04642e-05	0.000613976	0.00032635	0.000516625	0.00119149	0.000975942	0.000194168	0.000232526	0.000420271	0.000393215	2.4458e-09	1.03076e-11	1.48978e-05	3.74065e-05	0.000483136	0.000168888
297	0.00010139	0.0005139	2.31466e-05	0.000591607	0.000295473	0.000532914	0.000906789	0.000969695	0.000191958	0.000227331	0.000421378	0.000379355	2.51374e-09	1.05652e-11	1.14137e-05	3.83044e-05	0.000498923	0.000159836
298	0.000101978	0.000506132	2.72701e-05	0.000567956	0.000270638	0.000546047	0.000651085	0.000941748	0.000191629	0.000221446	0.000423281	0.000367019	2.58363e-09	1.0829e-11	9.54545e-06	3.92023e-05	0.000501259	0.000154203
299	0.000103396	0.000503999	3.30172e-05	0.000543552	0.000250555	0.000554735	0.000454315	0.000893439	0.000192469	0.000214965	0.000425926	0.000356568	2.65558e-09	1.10991e-11	8.95117e-06	4.01107e-05	0.000489848	0.000151785
300	0.000105687	0.000506641	4.05928e-05	0.000518921	0.000234232	0.000557806	0.000323795	0.000827775	0.000193974	0.000208	0.000429236	0.000347917	2.72973e-09	1.13757e-11	9.35973e-06	4.10471e-05	0.000466411	0.000152462
301	0.000108894	0.000513268	5.02163e-05	0.00049455	0.000220985	0.000554319	0.000250808	0.000749034	0.000195789	0.000200673	0.000433113	0.000340694	2.80627e-09	1.16589e-11	1.05738e-05	4.20395e-05	0.000434316	0.000156201
302	0.000113054	0.000523173	6.21116e-05	0.000470847	0.000210416	0.000543675	0.000219746	0.000662235	0.000197664	0.000193113	0.000437448	0.000334458	2.88542e-09	1.19489e-11	1.24619e-05	4.31308e-05	0.000397824	0.00016302
303	0.000118196	0.000535715	7.64933e-05	0.000448129	0.000202375	0.000525697	0.000215252	0.000572567	0.000199426	0.000185453	0.000442131	0.000328863	2.9675e-09	1.22458e-11	1.49439e-05	4.43843e-05	0.000361176	0.000172937
304	0.000124328	0.000550274	9.35509e-05	0.000426608	0.0001969	0.000500689	0.000225714	0.000484867	0.000200946	0.000177822	0.000447055	0.000323717	3.05295e-09	1.25498e-11	1.79764e-05	4.58916e-05	0.000327794	0.000185894
305	0.000131436	0.000566201	0.000113431	0.0004064	0.000194151	0.000469433	0.000243764	0.000403202	0.00020213	0.000170342	0.00045213	0.000318971	3.14234e-09	1.28611e-11	2.15375e-05	4.77809e-05	0.000299806	0.000201691
306	0.000139475	0.000582772	0.000136217	0.000387537	0.000194341	0.000433135	0.000265297	0.000330611	0.000202904	0.000163127	0.000457286	0.000314668	3.23649e-09	1.31797e-11	2.56149e-05	5.0225e-05	0.000277952	0.000219928
307	0.000148361	0.000599158	0.00016191	0.000369989	0.000197664	0.000393323	0.000288204	0.000269016	0.000203212	0.000156278	0.000462481	0.000310891	3.33649e-09	1.3506e-11	3.01964e-05	5.34473e-05	0.000261839	0.000239974
308	0.000157974	0.000614429	0.000190413	0.000353686	0.000204232	0.000351703	0.000311397	0.000219273	0.000203008	0.000149883	0.000467699	0.00030771	3.44385e-09	1.384e-11	3.52621e-05	5.77222e-05	0.000250356	0.000260968
309	0.000168151	0.000627582	0.000221512	0.000338544	0.000214017	0.00031001	0.00033424	0.000181341	0.00020226	0.000144016	0.000472956	0.000305161	3.56062e-09	1.4182e-11	4.07798e-05	6.33657e-05	0.000242122	0.000281865
310	0.000178689	0.000637608	0.000254865	0.00032448	0.000226819	0.000269854	0.000356268	0.000154511	0.000200948	0.000138734	0.000478289	0.000303229	3.68965e-09	1.45321e-11	4.67018e-05	7.07132e-05	0.000235829	0.000301512
311	0.00018935	0.000643576	0.000289999	0.000311433	0.000242255	0.000232609	0.000377075	0.000137659	0.000199064	0.000134077	0.000483755	0.00030185	3.83476e-09	1.48906e-11	5.29628e-05	8.00811e-05	0.00023045	0.000318758
312	0.000199869	0.00064473	0.000326311	0.00029937	0.000259784	0.000199336	0.000396278	0.000129491	0.000196618	0.000130074	0.000489419	0.00030092	4.00117e-09	1.52577e-11	5.94802e-05	9.17127e-05	0.000225305	0.000332577
313	0.000209961	0.000640578	0.000363081	0.00028829	0.000278793	0.000170758	0.000413517	0.000128764	0.000193634	0.000126735	0.000495341	0.00030032	4.19593e-09	1.56336e-11	6.61552e-05	0.000105713	0.000220042	0.00034218
314	0.00021934	0.000630962	0.000399485	0.000278226	0.000298751	0.000147281	0.000428462	0.00013448	0.000190157	0.00012406	0.000501564	0.00029995	4.42855e-09	1.60185e-11	7.28754e-05	0.000121983	0.000214568	0.000347105
315	0.000227727	0.000616089	0.000434628	0.000269235	0.000319455	0.00012905	0.000440827	0.000146067	0.000186252	0.000122037	0.000508099	0.00029977	4.71174e-09	1.64129e-11	7.95188e-05	0.000140165	0.000208967	0.000347271
316	0.000234871	0.000596522	0.000467575	0.000261389	0.000341327	0.000116018	0.000450396	0.000163566	0.000182012	0.000120642	0.000514917	0.000299847	5.06246e-09	1.6817e-11	8.59584e-05	0.00015962	0.00020343	0.000342978
317	0.000240558	0.000573128	0.000497393	0.000254769	0.000365661	0.000108023	0.00045706	0.000187806	0.000177556	0.000119846	0.000521931	0.000300395	5.50325e-09	1.72313e-11	9.20686e-05	0.000179444	0.000198193	0.000334867
318	0.000244629	0.000546998	0.000523193	0.000249447	0.000394618	0.000104848	0.000460882	0.000220568	0.000173034	0.000119611	0.000529001	0.000301773	6.06385e-09	1.76562e-11	9.77309e-05	0.000198533	0.000193501	0.000323841
319	0.000246986	0.000519335	0.000544176	0.000245484	0.000430727	0.00010625	0.000462222	0.000264655	0.000168629	0.000119897	0.000535925	0.000304428	6.78337e-09	1.80924e-11	0.000102841	0.000215701	0.000189569	0.000310965
320	0.0002476	0.000491348	0.000559671	0.000242914	0.000475768	0.000111966	0.000461929	0.000323773	0.000164554	0.000120659	0.000542446	0.000308759	7.71292e-09	1.85407e-11	0.000107315	0.000229816	0.000186573	0.000297362
321	0.000246513	0.000464151	0.000569172	0.000241741	0.000529285	0.00012169	0.000461627	0.000402106	0.000161049	0.00012185	0.000548263	0.000314934	8.91901e-09	1.90022e-11	0.000111094	0.000239956	0.000184628	0.000284124
322	0.000243836	0.000438683	0.000572369	0.000241934	0.000587372	0.000135027	0.000464066	0.000503512	0.000158374	0.000123425	0.000553047	0.000322725	1.04877e-08	1.94783e-11	0.000114151	0.000245531	0.000183791	0.000272253
323	0.000239742	0.000415661	0.000569161	0.000243426	0.000642632	0.000151443	0.000473447	0.000630329	0.000156796	0.000125337	0.000556461	0.000331472	1.25298e-08	1.99708e-11	0.000116492	0.000246361	0.000184057	0.000262624
324	0.000234454	0.000395562	0.000559665	0.000246115	0.000685867	0.000170222	0.000495528	0.000781997	0.000156569	0.000127543	0.000558181	0.000340243	1.51871e-08	2.04822e-11	0.000118157	0.0002427	0.000185368	0.000255966
325	0.000228234	0.000378632	0.000544211	0.000249863	0.000709176	0.000190454	0.000537246	0.000953813	0.000157917	0.000130001	0.000557923	0.000348141	1.86403e-08	2.10159e-11	0.00011922	0.000235182	0.000187618	0.000252834
326	0.000221367	0.000364915	0.00052332	0.000254507	0.000709183	0.000211055	0.00060558	0.00113629	0.000161005	0.000132671	0.000555465	0.000354628	2.31184e-08	2.15765e-11	0.000119787	0.000224735	0.000190671	0.000253548
327	0.000214147	0.000354292	0.000497683	0.000259861	0.000688748	0.000230824	0.000705577	0.00131552	0.000165915	0.000135518	0.000550665	0.000359695	2.89095e-08	2.21704e-11	0.000119987	0.000212464	0.000194372	0.000258083
328	0.00020686	0.000346531	0.00046812	0.000265725	0.000656178	0.000248551	0.000837811	0.00147481	0.000172626	0.000138509	0.000543481	0.000363756	3.63751e-08	2.28058e-11	0.00011997	0.000199543	0.000198559	0.000265936
329	0.000199771	0.000341322	0.000435545	0.000271892	0.000622259	0.000263134	0.000996	0.00159733	0.000180998	0.000141615	0.000533974	0.000367333	4.59652e-08	2.34946e-11	0.000119896	0.000187137	0.000203079	0.000276017
330	0.000193117	0.000338316	0.000400916	0.000278159	0.000596537	0.000273707	0.00116583	0.00166927	0.000190766	0.000144809	0.000522317	0.000370696	5.82376e-08	2.42522e-11	0.000119929	0.00017636	0.000207794	0.000286654
331	0.000187093	0.000337153	0.000365198	0.000284333	0.000584535	0.000279751	0.00132598	0.00168267	0.000201547	0.000148071	0.000508782	0.000373652	7.38795e-08	2.51001e-11	0.000120223	0.000168264	0.000212583	0.000295763
332	0.000181853	0.000337477	0.000329321	0.000290238	0.000586841	0.000281163	0.00145169	0.00163717	0.000212866	0.000151381	0.000493733	0.000375583	9.37325e-08	2.60669e-11	0.000120916	0.000163823	0.000217347	0.000301211
333	0.000177507	0.000338947	0.000294148	0.000295727	0.000600001	0.000278264	0.00152023	0.00154001	0.00022419	0.000154724	0.000477604	0.000375693	1.18822e-07	2.71914e-11	0.000122126	0.000163885	0.000222003	0.000301287
334	0.000174119	0.00034125	0.000260446	0.000300684	0.000618387	0.000271764	0.00151671	0.00140437	0.00023497	0.00015809	0.00046088	0.000373321	1.50388e-07	2.85259e-11	0.000123936	0.000169056	0.000226479	0.00029514
335	0.000171718	0.000344095	0.000228871	0.000305028	0.000636121	0.000262658	0.00143821	0.00124665	0.000244698	0.000161471	0.000444068	0.00036819	1.89926e-07	3.01403e-11	0.0001264	0.000179507	0.000230706	0.000283048
336	0.000170293	0.000347226	0.000199953	0.00030872	0.000648452	0.000252101	0.00129459	0.00108326	0.000252952	0.000164863	0.000427673	0.000360503	2.3922e-07	3.21283e-11	0.000129534	0.000194762	0.000234607	0.000266382
337	0.000169811	0.000350412	0.0001741	0.000311758	0.000652437	0.000241261	0.00110588	0.000927917	0.00025944	0.000168265	0.000412172	0.000350878	3.00396e-07	3.4615e-11	0.000133323	0.000213539	0.000238098	0.000247299
338	0.000170212	0.00035346	0.000151597	0.000314183	0.000647043	0.000231192	0.000897008	0.000790059	0.000264023	0.000171681	0.000397996	0.000340174	3.75964e-07	3.77664e-11	0.000137724	0.000233753	0.000241079	0.000228245
339	0.000171427	0.000356209	0.000132619	0.000316069	0.000632878	0.000222724	0.000691953	0.000674368	0.000266728	0.000175117	0.000385509	0.000329293	4.68867e-07	4.18028e-11	0.000142674	0.000252748	0.000243443	0.000211441
340	0.000173374	0.000358536	0.000117247	0.000317523	0.000611736	0.000216406	0.000509077	0.000581401	0.000267737	0.000178583	0.000374997	0.000319024	5.82544e-07	4.70154e-11	0.0001481	0.000267764	0.000245075	0.000198489
341	0.000175971	0.000360357	0.000105479	0.000318672	0.000586083	0.000212489	0.000358869	0.000508805	0.000267354	0.000182092	0.000366665	0.000309941	7.20973e-07	5.37877e-11	0.000153936	0.000276515	0.000245866	0.000190181
342	0.000179137	0.000361624	9.72527e-05	0.000319664	0.000558559	0.000210944	0.000244151	0.000452686	0.00026597	0.000185659	0.00036063	0.000302388	8.88735e-07	6.26238e-11	0.000160134	0.000277715	0.000245728	0.000186506
343	0.000182795	0.000362327	9.24566e-05	0.000320647	0.00053156	0.000211517	0.000162014	0.000408777	0.000264008	0.000189305	0.00035693	0.000296504	1.09106e-06	7.41833e-11	0.000166682	0.000271366	0.000244602	0.000186791
344	0.000186877	0.000362492	9.09483e-05	0.000321769	0.000506936	0.0002138	0.000106387	0.000373238	0.000261874	0.000193048	0.000355528	0.000292272	1.33389e-06	8.93276e-11	0.00017362	0.000258698	0.000242477	0.000189918
345	0.000191321	0.000362174	9.25642e-05	0.00032316	0.000485847	0.000217297	7.03477e-05	0.000343044	0.000259916	0.00019691	0.000356327	0.000289573	1.62391e-06	1.09177e-10	0.000181051	0.000241799	0.000239395	0.000194543
346	0.000196079	0.000361454	9.71285e-05	0.000324929	0.000468783	0.000221494	4.76638e-05	0.000316073	0.000258392	0.000200916	0.000359177	0.000288229	1.96858e-06	1.35187e-10	0.000189152	0.000223054	0.00023546	0.000199294
347	0.000201112	0.00036043	0.000104458	0.000327151	0.000455823	0.000225909	3.35067e-05	0.000290997	0.000257447	0.000205086	0.000363893	0.000288056	2.37618e-06	1.69237e-10	0.000198173	0.000204601	0.000230837	0.000202945
348	0.000206392	0.000359215	0.000114367	0.000329862	0.000447222	0.000230131	2.45489e-05	0.00026709	0.000257118	0.000209442	0.000370268	0.00028893	2.8558e-06	2.13753e-10	0.000208433	0.000187955	0.000225745	0.000204543
349	0.000211902	0.000357926	0.000126664	0.000333058	0.000444387	0.000233838	1.87269e-05	0.000244036	0.000257341	0.000214003	0.000378083	0.00029089	3.41735e-06	2.71852e-10	0.0002203	0.000173871	0.000220453	0.000203504
350	0.000217637	0.000356677	0.000141151	0.000336688	0.000451014	0.000236805	1.49124e-05	0.000221763	0.00025797	0.000218787	0.000387122	0.000294258	4.07152e-06	3.47531e-10	0.000234163	0.000162433	0.000215259	0.00019965
351	0.000223603	0.000355576	0.00015762	0.00034066	0.000473382	0.000238896	1.26385e-05	0.00020033	0.000258809	0.000223805	0.000397176	0.000299673	4.82973e-06	4.45896e-10	0.000250392	0.000153272	0.00021048	0.000193192
352	0.000229815	0.000354717	0.00017585	0.000344842	0.000518213	0.000240059	1.194e-05	0.000179847	0.000259636	0.000229067	0.000408057	0.000307835	5.70404e-06	5.73452e-10	0.000269289	0.00014581	0.000206429	0.000184659
353	0.000236301	0.000354177	0.000195602	0.000349072	0.000587221	0.000240303	1.3314e-05	0.000160436	0.000260235	0.000234579	0.0004196	0.000318895	6.70706e-06	7.38464e-10	0.000291036	0.000139467	0.000203404	0.000174776
354	0.000243098	0.000354013	0.000216612	0.000353163	0.000670556	0.000239687	1.77754e-05	0.000142205	0.000260416	0.000240343	0.000431666	0.000331712	7.85178e-06	9.514e-10	0.000315648	0.000133774	0.000201667	0.000164335
355	0.000250251	0.000354261	0.000238596	0.000356918	0.000744877	0.0002383	2.69629e-05	0.000125236	0.000260031	0.000246364	0.000444145	0.000343634	9.15141e-06	1.22548e-09	0.000342929	0.000128423	0.000201437	0.000154071
356	0.000257812	0.000354935	0.000261242	0.000360137	0.000780961	0.000236252	4.32341e-05	0.000109581	0.000258986	0.000252651	0.000456958	0.000351373	1.06191e-05	1.57736e-09	0.000372453	0.000123255	0.000202872	0.000144563
357	0.00026584	0.00035603	0.000284214	0.00036263	0.000758673	0.000233661	6.96691e-05	9.52657e-05	0.000257244	0.000259226	0.000470054	0.000352699	1.22679e-05	2.02794e-09	0.000403563	0.000118223	0.000206068	0.000136192
358	0.000274394	0.00035752	0.000307155	0.00036423	0.000679106	0.000230647	0.000109888	8.22862e-05	0.000254824	0.000266132	0.000483406	0.000347819	1.41101e-05	2.6034e-09	0.0004354	0.000113353	0.000211046	0.000129133
359	0.000283529	0.000359363	0.000329689	0.0003648	0.000564198	0.000227329	0.000167599	7.06168e-05	0.000251796	0.000273441	0.000497015	0.000339322	1.61572e-05	3.33644e-09	0.000466951	0.000108709	0.000217754	0.000123383
360	0.000293294	0.000361506	0.000351431	0.000364239	0.000444063	0.000223827	0.000245844	6.02115e-05	0.000248274	0.000281268	0.000510898	0.000330723	1.84195e-05	4.26776e-09	0.000497128	0.000104368	0.000226058	0.000118817
361	0.000303726	0.000363885	0.000371994	0.000362493	0.000342057	0.000220263	0.000346001	5.10083e-05	0.000244411	0.000289776	0.000525089	0.000324743	2.09057e-05	5.44791e-09	0.000524854	0.000100407	0.000235747	0.000115236
362	0.000314839	0.000366429	0.000390996	0.00035955	0.000267516	0.000216766	0.00046672	4.29332e-05	0.000240386	0.000299183	0.000539634	0.000322458	2.36226e-05	6.9395e-09	0.000549152	9.69001e-05	0.000246529	0.00011242
363	0.000326624	0.000369065	0.000408074	0.000355445	0.000217993	0.000213478	0.000603085	3.59034e-05	0.000236401	0.000309747	0.000554584	0.000323528	2.65744e-05	8.81984e-09	0.000569231	9.3925e-05	0.000258042	0.00011016
364	0.000339037	0.000371718	0.000422889	0.000350253	0.000185907	0.000210558	0.00074635	2.9831e-05	0.000232675	0.000321755	0.000569992	0.000326945	2.97628e-05	1.11841e-08	0.000584549	9.15807e-05	0.000269861	0.000108282
365	0.000351999	0.000374318	0.000435144	0.000344088	0.000163968	0.000208183	0.000884499	2.46258e-05	0.000229434	0.000335478	0.000585908	0.000331657	3.31862e-05	1.41493e-08	0.00059485	9.00199e-05	0.000281509	0.00010665
366	0.00036539	0.000376798	0.000444583	0.000337092	0.000147355	0.000206552	0.00100373	2.01978e-05	0.00022691	0.000351126	0.000602372	0.000336841	3.68396e-05	1.78587e-08	0.000600176	8.94942e-05	0.000292479	0.000105169
367	0.000379045	0.0003791	0.000451011	0.000329428	0.000133548	0.000205877	0.00109067	1.64591e-05	0.000225338	0.000368779	0.000619411	0.000341934	4.07142e-05	2.24872e-08	0.000600844	9.04061e-05	0.00030226	0.000103778
368	0.00039276	0.000381173	0.000454289	0.000321273	0.000121423	0.00020638	0.00113478	1.3326e-05	0.000224945	0.000388321	0.000637037	0.000346578	4.4797e-05	2.82481e-08	0.000597414	9.33462e-05	0.000310355	0.000102442
369	0.000406295	0.000382977	0.000454348	0.000312806	0.000110505	0.000208281	0.00113051	1.07198e-05	0.000225949	0.000409379	0.000655241	0.000350581	4.90711e-05	3.54004e-08	0.000590627	9.90818e-05	0.00031632	0.000101146
370	0.000419379	0.000384483	0.000451187	0.000304203	0.00010057	0.000211781	0.0010784	8.56767e-06	0.000228553	0.000431289	0.00067399	0.000353888	5.35151e-05	4.42577e-08	0.000581365	0.000108455	0.000319785	9.98875e-05
371	0.00043172	0.000385673	0.000444872	0.000295628	9.14886e-05	0.000217047	0.000984968	6.80348e-06	0.000232937	0.000453093	0.000693228	0.000356565	5.81032e-05	5.51993e-08	0.000570606	0.00012216	0.00032048	9.86766e-05
372	0.000443021	0.000386544	0.000435536	0.00028723	8.31734e-05	0.000224194	0.000861396	5.36777e-06	0.000239253	0.000473592	0.000712872	0.000358757	6.28055e-05	6.86817e-08	0.000559427	0.000140424	0.000318254	9.75299e-05
373	0.00045299	0.000387102	0.000423373	0.000279135	7.55665e-05	0.00023327	0.00072131	4.2078e-06	0.000247614	0.000491442	0.000732816	0.000360644	6.7588e-05	8.52536e-08	0.000549031	0.000162662	0.00031309	9.6471e-05
374	0.000461361	0.000387369	0.000408633	0.000271448	6.86334e-05	0.000244238	0.000578334	3.27734e-06	0.000258093	0.000505293	0.000752929	0.000362393	7.24129e-05	1.05572e-07	0.000540807	0.000187267	0.0003051	9.55305e-05
375	0.000467902	0.000387378	0.000391609	0.000264249	6.23587e-05	0.000256971	0.00044399	2.53632e-06	0.000270709	0.000513947	0.00077306	0.000364121	7.72391e-05	1.3042e-07	0.000536389	0.000211668	0.000294519	9.47458e-05
376	0.000472431	0.000387174	0.000372635	0.000257595	5.67418e-05	0.000271248	0.000326367	1.95044e-06	0.000285428	0.000516519	0.00079304	0.000365883	8.20228e-05	1.60733e-07	0.000537653	0.00023277	0.00028169	9.41618e-05
377	0.00047483	0.000386814	0.000352066	0.000251523	5.17928e-05	0.000286755	0.000229708	1.49056e-06	0.000302154	0.000512558	0.000812686	0.000367672	8.67178e-05	1.97618e-07	0.000546572	0.000247674	0.000267037	9.38317e-05
378	0.000475049	0.000386363	0.000330274	0.000246052	4.7529e-05	0.000303102	0.000154804	1.13227e-06	0.000320725	0.000502118	0.000831807	0.00036944	9.12766e-05	2.42385e-07	0.000564882	0.000254504	0.000251037	9.38177e-05
379	0.000473109	0.000385895	0.000307635	0.000241184	4.39718e-05	0.000319841	9.98912e-05	8.55281e-07	0.000340915	0.00048576	0.000850207	0.000371126	9.5651e-05	2.96577e-07	0.000593549	0.00025302	0.000234185	9.41913e-05
380	0.000469102	0.00038549	0.000284517	0.00023691	4.11443e-05	0.000336491	6.17178e-05	6.42921e-07	0.000362426	0.000464486	0.000867694	0.000372673	9.97928e-05	3.62007e-07	0.000632167	0.000244806	0.000216968	9.50336e-05
381	0.000463189	0.000385231	0.00026127	0.000233216	3.90702e-05	0.000352566	3.65116e-05	4.81646e-07	0.000384897	0.000439608	0.000884083	0.000374045	0.000103655	4.40797e-07	0.000678521	0.000232956	0.000199834	9.6435e-05
382	0.000455583	0.000385199	0.000238222	0.000230078	3.77727e-05	0.00036761	2.0682e-05	3.60585e-07	0.000407904	0.000412594	0.000899201	0.000375227	0.000107193	5.35418e-07	0.000728577	0.000221385	0.000183171	9.84946e-05
383	0.000446547	0.000385473	0.000215667	0.000227474	3.7273e-05	0.000381223	1.12174e-05	2.71134e-07	0.000430972	0.000384905	0.000912894	0.000376226	0.000110364	6.4874e-07	0.000777078	0.000213992	0.000167295	0.000101318
384	0.000436372	0.000386125	0.000193864	0.000225383	3.75906e-05	0.000393086	5.82561e-06	2.06609e-07	0.000453587	0.000357849	0.000925029	0.000377054	0.000113129	7.84083e-07	0.000818705	0.000213888	0.000152443	0.000105014
385	0.000425366	0.000387213	0.000173029	0.000223784	3.87416e-05	0.000402979	2.897e-06	1.61949e-07	0.000475215	0.000332479	0.0009355	0.000377726	0.000115455	9.45265e-07	0.000849465	0.000222816	0.000138767	0.000109692
386	0.000413837	0.000388782	0.000153339	0.000222663	4.07382e-05	0.000410791	1.37958e-06	1.3347e-07	0.000495328	0.000309539	0.000944229	0.000378248	0.000117314	1.13666e-06	0.000867822	0.000240802	0.000126347	0.000115454
387	0.000402082	0.000390861	0.000134926	0.00022201	4.35876e-05	0.00041652	6.29272e-07	1.18678e-07	0.000513435	0.000289461	0.00095117	0.00037862	0.000118682	1.36327e-06	0.000875126	0.000266062	0.000115198	0.000122391
388	0.000390376	0.000393455	0.000117883	0.000221821	4.72902e-05	0.000420265	2.75153e-07	1.16122e-07	0.000529112	0.000272399	0.000956308	0.000378833	0.000119543	1.63076e-06	0.000875163	0.000295244	0.000105279	0.000130569
389	0.000378958	0.000396551	0.000102262	0.000222095	5.18384e-05	0.00042221	1.1568e-07	1.25305e-07	0.000542036	0.000258287	0.000959663	0.000378881	0.000119888	1.94551e-06	0.000873015	0.000324051	9.65134e-05	0.000140023
390	0.000368032	0.000400114	8.80825e-05	0.000222842	5.72144e-05	0.000422605	4.7333e-08	1.46636e-07	0.000552018	0.00024691	0.000961287	0.000378763	0.000119714	2.31471e-06	0.000873679	0.000348238	8.8798e-05	0.000150746
391	0.00035776	0.000404091	7.53312e-05	0.000224071	6.33889e-05	0.000421741	1.98055e-08	1.81425e-07	0.000559023	0.000237976	0.000961262	0.000378492	0.000119027	2.74638e-06	0.000880943	0.000364748	8.2016e-05	0.000162681
392	0.000348264	0.000408414	6.39694e-05	0.0002258	7.03187e-05	0.000419927	1.00292e-08	2.31924e-07	0.000563188	0.000231166	0.000959704	0.000378101	0.000117838	3.24941e-06	0.000896838	0.000372634	7.60475e-05	0.000175709
393	0.000339627	0.000413009	5.39368e-05	0.000228045	7.79461e-05	0.000417468	8.17126e-09	3.01407e-07	0.000564818	0.000226181	0.000956756	0.000377641	0.000116165	3.83359e-06	0.000921711	0.000373381	7.07773e-05	0.000189645
394	0.000331898	0.0004178	4.51576e-05	0.000230829	8.61973e-05	0.000414648	1.06086e-08	3.94295e-07	0.000564373	0.000222761	0.000952588	0.000377186	0.000114034	4.50966e-06	0.000954714	0.000370455	6.60997e-05	0.000204239
395	0.000325095	0.000422721	3.75467e-05	0.000234172	9.49822e-05	0.000411717	1.66836e-08	5.16314e-07	0.000562444	0.000220702	0.000947393	0.000376826	0.000111476	5.28927e-06	0.000994401	0.000368183	6.19225e-05	0.000219179
396	0.000319216	0.000427728	3.10184e-05	0.000238096	0.000104195	0.000408882	2.73992e-08	6.74703e-07	0.00055971	0.000219851	0.000941385	0.000376667	0.000108528	6.18499e-06	0.00103919	0.000370358	5.81683e-05	0.0002341
397	0.000314239	0.000432805	2.55019e-05	0.000242619	0.000113715	0.000406308	4.50929e-08	8.78452e-07	0.000556897	0.000220105	0.000934796	0.000376821	0.00010523	7.21025e-06	0.00108754	0.000379022	5.47744e-05	0.000248605
398	0.000310131	0.00043798	2.09687e-05	0.00024776	0.000123408	0.000404115	7.36397e-08	1.13859e-06	0.000554725	0.000221401	0.00092787	0.000377404	0.000101627	8.3793e-06	0.0011379	0.000393843	5.16923e-05	0.000262278
399	0.000306851	0.000443327	1.74862e-05	0.000253529	0.000133132	0.000402383	1.19013e-07	1.46847e-06	0.000553862	0.000223708	0.000920863	0.000378533	9.77673e-05	9.70706e-06	0.00118855	0.000412242	4.88862e-05	0.00027472
400	0.000304354	0.000448967	1.53134e-05	0.000259934	0.000142736	0.000401161	1.90171e-07	1.88418e-06	0.000554891	0.000227019	0.000914037	0.000380319	9.37006e-05	1.1209e-05	0.00123744	0.00043021	4.6331e-05	0.000285567
401	0.000302596	0.000455073	1.50605e-05	0.000266976	0.000152072	0.00040047	3.00311e-07	2.40483e-06	0.000558275	0.000231342	0.000907657	0.000382873	8.94776e-05	1.2901e-05	0.00128227	0.000443537	4.4011e-05	0.000294523
402	0.000301533	0.000461851	1.79259e-05	0.000274648	0.000160992	0.000400309	4.68565e-07	3.05303e-06	0.000564352	0.000236701	0.000901986	0.000386304	8.51494e-05	1.47992e-05	0.00132078	0.000449034	4.1918e-05	0.000301378
403	0.000301124	0.00046953	2.59975e-05	0.000282937	0.000169359	0.000400663	7.22238e-07	3.85522e-06	0.000573326	0.000243129	0.000897282	0.00039073	8.07666e-05	1.69194e-05	0.00135115	0.000445387	4.00496e-05	0.000306025
404	0.000301328	0.000478336	4.25526e-05	0.000291818	0.000177052	0.000401502	1.09969e-06	4.84211e-06	0.000585283	0.000250669	0.000893797	0.000396281	7.63783e-05	1.92773e-05	0.00137243	0.000433351	3.84082e-05	0.000308469
405	0.000302108	0.000488462	7.22138e-05	0.00030126	0.000183972	0.000402787	1.65395e-06	6.04906e-06	0.000600215	0.000259374	0.00089177	0.000403108	7.20312e-05	2.18878e-05	0.00138486	0.000415318	3.70001e-05	0.000308826
406	0.000303428	0.000500045	0.000120744	0.000311221	0.000190045	0.000404469	2.45717e-06	7.51638e-06	0.000618041	0.000269306	0.000891428	0.000411374	6.77695e-05	2.47647e-05	0.0013898	0.000394449	3.58346e-05	0.000307314
407	0.00030525	0.000513128	0.000194254	0.00032165	0.000195233	0.000406488	3.60615e-06	9.28967e-06	0.000638643	0.000280537	0.000892979	0.000421235	6.36341e-05	2.79205e-05	0.00138945	0.000373756	3.49248e-05	0.000304232
408	0.000307537	0.000527649	0.000297688	0.000332487	0.000199536	0.000408777	5.22937e-06	1.142e-05	0.000661895	0.000293157	0.000896615	0.00043281	5.9662e-05	3.13657e-05	0.00138637	0.000355435	3.42876e-05	0.000299938
409	0.000310247	0.00054342	0.000432723	0.000343664	0.000202997	0.000411258	7.4977e-06	1.39639e-05	0.000687683	0.000307269	0.000902507	0.000446124	5.5886e-05	3.51085e-05	0.00138294	0.000340607	3.39462e-05	0.000294826
410	0.000313337	0.000560137	0.000595581	0.000355105	0.000205704	0.000413844	1.06449e-05	1.69837e-05	0.000715931	0.000322997	0.000910804	0.000461061	5.23349e-05	3.91547e-05	0.00138095	0.000329452	3.39334e-05	0.000289292
411	0.000316757	0.000577395	0.000775558	0.000366727	0.000207798	0.000416437	1.50143e-05	2.05466e-05	0.000746612	0.000340489	0.000921634	0.00047733	4.9033e-05	4.35068e-05	0.00138142	0.000321548	3.42967e-05	0.000283716
412	0.000320455	0.00059472	0.00095516	0.000378442	0.000209469	0.000418938	2.11701e-05	2.47252e-05	0.000779753	0.000359913	0.0009351	0.000494478	4.6e-05	4.8164e-05	0.00138457	0.000316263	3.51062e-05	0.000278437
413	0.00032437	0.000611615	0.00111238	0.000390156	0.000210957	0.000421238	3.0144e-05	2.95961e-05	0.000815432	0.000381468	0.000951283	0.000511961	4.32514e-05	5.31215e-05	0.00138996	0.00031305	3.64636e-05	0.000273737
414	0.000328438	0.000627613	0.00122494	0.000401775	0.000212549	0.000423229	4.39198e-05	3.52396e-05	0.000853777	0.000405374	0.000970238	0.000529262	4.07984e-05	5.83709e-05	0.00139671	0.000311611	3.85128e-05	0.000269838
415	0.000332589	0.000642326	0.00127539	0.000413204	0.00021457	0.000424807	6.62421e-05	4.17381e-05	0.000894954	0.000431869	0.000991996	0.000546049	3.86485e-05	6.38993e-05	0.00140368	0.000311948	4.14496e-05	0.000266891
416	0.000336748	0.000655489	0.00125555	0.000424346	0.00021737	0.000425871	0.000103683	4.91755e-05	0.000939153	0.000461205	0.00101656	0.000562314	3.6805e-05	6.96897e-05	0.00140966	0.00031434	4.55262e-05	0.000264988
417	0.000340838	0.000666991	0.00116866	0.000435111	0.000221312	0.000426332	0.000166542	5.76346e-05	0.000986579	0.000493629	0.00104391	0.000578448	3.52681e-05	7.57212e-05	0.00141357	0.000319302	5.10468e-05	0.000264159
418	0.000344778	0.00067688	0.00102855	0.000445411	0.000226745	0.000426111	0.00026867	6.71964e-05	0.00103744	0.000529367	0.001074	0.000595212	3.40349e-05	8.19686e-05	0.00141457	0.000327532	5.83497e-05	0.00026439
419	0.000348485	0.000685362	0.000855993	0.000455166	0.000233985	0.00042515	0.000424986	7.79369e-05	0.00109192	0.000568605	0.00110675	0.000613574	3.30997e-05	8.84035e-05	0.00141224	0.000339844	6.77699e-05	0.000265629
420	0.00035188	0.000692762	0.000673759	0.000464304	0.00024328	0.000423406	0.000645965	8.99256e-05	0.00115019	0.000611458	0.00114206	0.00063444	3.24545e-05	9.49946e-05	0.00140665	0.000357063	7.95834e-05	0.000267803
421	0.000354883	0.000699488	0.000501763	0.000472761	0.000254791	0.000420858	0.000929984	0.000103223	0.00121239	0.000657948	0.0011798	0.000658327	3.20891e-05	0.000101709	0.0013984	0.000379856	9.39358e-05	0.00027082
422	0.000357421	0.000705975	0.00035388	0.000480488	0.00026856	0.000417509	0.00125677	0.000117878	0.0012786	0.000707978	0.00121981	0.000685106	3.19918e-05	0.000108512	0.00138864	0.000408505	0.000110765	0.000274589
423	0.000359424	0.000712636	0.000236893	0.000487445	0.000284503	0.000413386	0.00158662	0.000133925	0.00134887	0.000761314	0.0012619	0.000713949	3.21495e-05	0.000115373	0.00137891	0.000442645	0.000129734	0.000279019
424	0.000360832	0.000719817	0.000151361	0.000493607	0.000302397	0.000408538	0.00186859	0.000151384	0.00142317	0.000817577	0.00130588	0.000743544	3.25479e-05	0.00012226	0.00137105	0.000481069	0.000150197	0.000284029
425	0.000361596	0.000727763	9.36068e-05	0.000498963	0.000321893	0.000403042	0.00205675	0.000170253	0.00150138	0.000876244	0.00135152	0.000772549	3.3172e-05	0.00012915	0.00136693	0.000521691	0.000171205	0.000289554
426	0.000361676	0.000736607	5.79483e-05	0.000503516	0.000342538	0.000397002	0.0021277	0.000190515	0.00158332	0.000936665	0.00139857	0.000800083	3.4006e-05	0.000136027	0.00136826	0.000561759	0.00019158	0.000295539
427	0.000361046	0.000746363	3.85112e-05	0.000507283	0.000363811	0.000390548	0.00209094	0.00021213	0.00166868	0.000998096	0.00144677	0.000826039	3.50341e-05	0.000142886	0.00137641	0.00059831	0.000210036	0.000301952
428	0.000359695	0.000756948	3.03407e-05	0.000510296	0.000385176	0.000383845	0.00198619	0.000235039	0.00175707	0.00105974	0.00149587	0.000851058	3.62397e-05	0.000149739	0.00139216	0.000628783	0.000225348	0.00030877
429	0.000357624	0.000768207	2.98428e-05	0.000512602	0.000406127	0.000377095	0.00186877	0.000259166	0.00184798	0.00112082	0.00154559	0.000876193	3.76067e-05	0.000156614	0.00141563	0.000651589	0.000236525	0.000315991
430	0.000354852	0.000779939	3.47569e-05	0.000514258	0.00042625	0.000370547	0.00179021	0.000284421	0.00194078	0.00118059	0.00159569	0.000902442	3.91186e-05	0.000163559	0.00144621	0.000666446	0.00024297	0.00032362
431	0.000351412	0.000791933	4.38932e-05	0.000515335	0.000445257	0.000364507	0.0017827	0.000310711	0.00203477	0.00123847	0.00164591	0.000930374	4.07593e-05	0.000170647	0.00148255	0.000674354	0.000244568	0.000331674
432	0.000347353	0.000803992	5.68089e-05	0.000515913	0.00046302	0.000359351	0.00185264	0.000337947	0.00212915	0.00129404	0.00169604	0.000959977	4.25129e-05	0.000177969	0.00152268	0.000677237	0.000241712	0.000340177
433	0.000342739	0.000815954	7.35228e-05	0.000516083	0.000479576	0.000355536	0.00198329	0.000366067	0.00222307	0.00134707	0.00174586	0.00099073	4.43642e-05	0.000185635	0.00156419	0.000677381	0.000235234	0.000349156
434	0.000337648	0.000827701	9.42991e-05	0.000515941	0.000495116	0.000353608	0.00214311	0.000395049	0.00231566	0.0013976	0.0017952	0.00102181	4.62987e-05	0.000193767	0.00160451	0.000676901	0.000226272	0.000358634
435	0.00033217	0.000839163	0.000119496	0.000515587	0.000509948	0.000354194	0.0022956	0.000424946	0.00240602	0.00144585	0.00184393	0.00105233	4.8304e-05	0.000202487	0.0016412	0.000677394	0.000216105	0.000368635
436	0.00032641	0.000850315	0.00014946	0.000515127	0.000524452	0.000357986	0.00240782	0.000455912	0.00249332	0.00149227	0.00189195	0.00108155	5.03706e-05	0.000211906	0.00167223	0.000679881	0.000205978	0.000379167
437	0.000320482	0.000861165	0.000184451	0.000514664	0.000539017	0.00036569	0.00245635	0.000488237	0.00257674	0.00153745	0.00193917	0.001109	5.24949e-05	0.000222107	0.00169623	0.000684979	0.000196964	0.00039023
438	0.000314511	0.00087175	0.000224586	0.000514302	0.000553986	0.000377958	0.00243045	0.000522372	0.00265555	0.00158204	0.00198557	0.00113455	5.46832e-05	0.000233123	0.00171266	0.00069318	0.000189874	0.000401803
439	0.000308631	0.000882131	0.000269802	0.000514138	0.000569606	0.000395282	0.00233236	0.000558949	0.00272908	0.00162673	0.00203114	0.00115836	5.69585e-05	0.000244926	0.00172178	0.000705098	0.000185236	0.000413844
440	0.00030298	0.000892391	0.000319839	0.000514265	0.000585985	0.000417887	0.00217513	0.000598776	0.00279675	0.00167215	0.00207591	0.00118085	5.93709e-05	0.000257408	0.0017246	0.00072156	0.000183325	0.000426287
441	0.000297706	0.000902641	0.000374271	0.000514766	0.000603082	0.000445619	0.00197855	0.000642812	0.00285807	0.00171878	0.00211991	0.00120252	6.20117e-05	0.000270373	0.00172263	0.000743516	0.000184238	0.000439042
442	0.000292958	0.000913033	0.000432595	0.000515716	0.000620701	0.000477866	0.00176445	0.000692092	0.00291264	0.00176696	0.00216321	0.00122388	6.50317e-05	0.000283539	0.00171762	0.000771798	0.000187998	0.000451989
443	0.000288889	0.00092377	0.000494423	0.000517175	0.000638515	0.000513536	0.00155249	0.000747616	0.00296013	0.00181682	0.00220587	0.00124528	6.86631e-05	0.000296541	0.00171131	0.000806843	0.000194649	0.000464991
444	0.00028565	0.00093512	0.000559776	0.000519192	0.000656099	0.00055112	0.00135736	0.000810204	0.00300031	0.00186829	0.00224795	0.00126692	7.32407e-05	0.000308957	0.0017051	0.000848511	0.00020435	0.000477887
445	0.000283392	0.000947421	0.000629498	0.000521805	0.000672977	0.000588837	0.00118792	0.000880302	0.00303305	0.00192115	0.00228952	0.0012888	7.92173e-05	0.000320333	0.00169998	0.000896098	0.000217429	0.000490512
446	0.000282261	0.000961077	0.000705682	0.000525033	0.000688663	0.000624864	0.00104781	0.000957799	0.0030583	0.00197505	0.00233061	0.00131084	8.71663e-05	0.000330221	0.00169642	0.000948614	0.00023438	0.000502698
447	0.000282395	0.000976537	0.000791956	0.000528886	0.000702717	0.000657595	0.000937104	0.00104185	0.00307612	0.00202958	0.00237126	0.0013329	9.776e-05	0.000338217	0.00169438	0.00100526	0.000255811	0.000514292
448	0.000283918	0.000994256	0.000893335	0.00053336	0.000714774	0.000685909	0.00085409	0.00113077	0.00308671	0.00208435	0.00241147	0.00135491	0.000111715	0.000343998	0.00169346	0.00106596	0.000282312	0.000525164
449	0.000286942	0.00101464	0.00101536	0.000538439	0.00072458	0.000709365	0.000796817	0.00122201	0.00309037	0.00213908	0.00245122	0.00137689	0.000129703	0.000347356	0.00169301	0.00113183	0.000314276	0.000535228
450	0.000291555	0.00103798	0.00116233	0.000544096	0.000732009	0.000728292	0.00076403	0.0013123	0.00308758	0.00219361	0.00249047	0.00139893	0.000152222	0.000348219	0.00169232	0.00120529	0.000351703	0.000544444
451	0.000297821	0.00106438	0.00133487	0.000550299	0.000737069	0.000743739	0.000755573	0.0013979	0.00307893	0.00224798	0.00252913	0.00142117	0.000179452	0.000346656	0.00169075	0.00128984	0.000394039	0.000552837
452	0.00030577	0.00109368	0.00152741	0.000557008	0.0007399	0.000757304	0.000772428	0.00147502	0.00306519	0.00230245	0.00256711	0.00144371	0.000211111	0.000342873	0.00168784	0.00138941	0.000440131	0.000560493
453	0.000315395	0.00112544	0.00172667	0.000564179	0.000740761	0.000770853	0.000816646	0.00154033	0.00304722	0.00235745	0.00260429	0.00146652	0.00024636	0.000337194	0.00168337	0.00150749	0.000488333	0.000567565
454	0.000326647	0.0011589	0.00191217	0.00057177	0.000740016	0.000786202	0.000891369	0.0015915	0.00302604	0.00241361	0.00264051	0.00148945	0.000283781	0.000330027	0.00167736	0.00164605	0.000536796	0.000574265
455	0.000339425	0.00119303	0.00205945	0.000579737	0.000738108	0.000804809	0.00100103	0.00162773	0.00300272	0.00247163	0.00267562	0.00151226	0.000321465	0.000321833	0.00167004	0.00180475	0.000583897	0.000580859
456	0.000353575	0.00122659	0.00214535	0.00058804	0.000735535	0.000827547	0.00115158	0.00165018	0.00297838	0.00253228	0.00270944	0.00153474	0.000357222	0.000313081	0.00166181	0.00198042	0.000628709	0.000587647
457	0.000368887	0.00125825	0.00215401	0.000596645	0.000732829	0.000854573	0.00135026	0.00166274	0.00295411	0.00259629	0.00274178	0.00155687	0.000388891	0.000304218	0.00165309	0.00216715	0.000671394	0.000594949
458	0.000385092	0.0012867	0.00208137	0.000605523	0.000730527	0.000885337	0.00160425	0.00167404	0.00293089	0.00266428	0.00277246	0.00157892	0.000414693	0.00029564	0.00164429	0.00235698	0.000713393	0.000603089
459	0.000401865	0.00131083	0.00193664	0.000614654	0.000729153	0.000918687	0.00191754	0.00170273	0.00290954	0.00273673	0.00280129	0.00160156	0.000433575	0.000287669	0.00163569	0.0025412	0.000757351	0.000612375
460	0.00041883	0.00132982	0.00173995	0.000624024	0.000729191	0.000953068	0.00228633	0.00178641	0.00289063	0.00281387	0.00282809	0.00162592	0.000445443	0.000280547	0.00162741	0.00271189	0.000806755	0.000623084
461	0.000435566	0.00134323	0.00151721	0.000633629	0.000731072	0.000986755	0.0026941	0.00198637	0.00287445	0.00289571	0.00285268	0.00165345	0.000451231	0.000274438	0.00161936	0.00286338	0.000865364	0.000635447
462	0.000451622	0.00135104	0.00129399	0.000643471	0.000735158	0.00101809	0.00310928	0.00236864	0.00286092	0.002982	0.00287491	0.00168531	0.000452776	0.000269427	0.00161125	0.00299329	0.000936511	0.000649637
463	0.000466531	0.00135363	0.00109044	0.000653561	0.000741732	0.0010457	0.00348783	0.0029462	0.00284965	0.00307222	0.00289463	0.00172096	0.000452503	0.000265541	0.00160261	0.00310274	0.00102243	0.000665767
464	0.000479828	0.00135173	0.000918644	0.000663912	0.000750996	0.00106859	0.00378206	0.00361094	0.00283993	0.00316559	0.00291173	0.00175672	0.000452976	0.000262761	0.0015929	0.0031958	0.00112372	0.000683876
465	0.000491074	0.00134629	0.00078255	0.000674547	0.000763067	0.00108629	0.0039533	0.00413524	0.00283079	0.00326111	0.00292612	0.00178616	0.000456417	0.000261032	0.00158154	0.00327827	0.00123897	0.000703934
466	0.000499874	0.0013384	0.000679846	0.000685489	0.000777985	0.00109877	0.00398379	0.00429342	0.00282113	0.0033576	0.00293772	0.00180326	0.000464287	0.000260284	0.00156801	0.00335621	0.00136477	0.000725832
467	0.000505901	0.00132916	0.000604611	0.000696762	0.00079572	0.00110645	0.0038825	0.00402761	0.00280979	0.00345372	0.00294651	0.00180657	0.000477013	0.000260434	0.00155199	0.00343455	0.00149592	0.000749389
468	0.000508914	0.00131959	0.000549782	0.000708395	0.000816185	0.0011101	0.00368204	0.00350534	0.00279573	0.00354805	0.00295246	0.00180054	0.000493928	0.000261396	0.00153334	0.00351608	0.00162604	0.000774345
469	0.000508774	0.00131055	0.000508853	0.000720411	0.000839244	0.0011107	0.00342804	0.00301472	0.00277807	0.00363911	0.00295561	0.00179284	0.000513412	0.000263082	0.00151223	0.00360096	0.00174828	0.00080037
470	0.000505456	0.00130274	0.00047671	0.000732835	0.000864721	0.00110937	0.00316587	0.00280192	0.00275624	0.00372547	0.00295601	0.0017902	0.000533208	0.000265402	0.00148912	0.00368682	0.00185612	0.000827068
471	0.000499048	0.00129665	0.00044979	0.000745687	0.000892401	0.00110731	0.00292986	0.0029733	0.00272999	0.00380575	0.00295376	0.0017959	0.000550828	0.000268265	0.00146477	0.00376919	0.00194401	0.000853991
472	0.000489754	0.0012926	0.000425858	0.000758982	0.00092203	0.0011057	0.00273848	0.00347692	0.00269945	0.00387871	0.00294898	0.00180919	0.000563964	0.000271574	0.00144017	0.00384236	0.0020078	0.000880654
473	0.000477878	0.00129076	0.000403656	0.000772733	0.0009533	0.00110566	0.00259561	0.00412527	0.00266504	0.00394331	0.00294183	0.00182582	0.000570817	0.000275225	0.00141647	0.00390036	0.00204476	0.000906565
474	0.000463813	0.00129118	0.000382575	0.000786945	0.000985843	0.00110827	0.00249587	0.00466423	0.00262749	0.00399875	0.00293249	0.00183982	0.000570297	0.000279108	0.00139491	0.00393806	0.00205352	0.000931251
475	0.000448015	0.00129381	0.000362406	0.000801617	0.00101921	0.0011145	0.00243116	0.00490429	0.00258769	0.00404446	0.00292118	0.00184672	0.000562071	0.000283107	0.00137666	0.00395214	0.00203393	0.000954297
476	0.000430982	0.00129854	0.000343181	0.000816745	0.00105284	0.00112519	0.00239647	0.00485298	0.00254661	0.0040802	0.00290815	0.00184677	0.000546478	0.000287101	0.00136279	0.00394176	0.00198702	0.000975381
477	0.000413224	0.00130517	0.000325071	0.000832313	0.00108612	0.00114101	0.0023932	0.00473454	0.00250524	0.00410599	0.00289365	0.00184548	0.000524354	0.000290973	0.00135409	0.00390888	0.00191515	0.00099431
478	0.000395241	0.00131345	0.000308334	0.0008483	0.00111829	0.00116235	0.00242871	0.00485258	0.00246446	0.00412216	0.00287799	0.00185035	0.000496835	0.000294612	0.00135103	0.00385787	0.00182222	0.00101104
479	0.000377498	0.00132308	0.000293282	0.000864679	0.00114856	0.00118928	0.00251115	0.00537714	0.00242503	0.00412929	0.00286146	0.00186572	0.000465161	0.000297922	0.00135371	0.00379479	0.00171369	0.00102571
480	0.000360404	0.00133369	0.000280256	0.000881412	0.00117611	0.00122147	0.00264017	0.00620085	0.00238751	0.00412816	0.00284437	0.00188914	0.000430542	0.000300826	0.00136182	0.00372625	0.00159621	0.00103861
481	0.000344304	0.00134489	0.000269612	0.000898457	0.00120012	0.00125813	0.00279711	0.00697469	0.00235228	0.00411975	0.00282706	0.00191192	0.000394083	0.000303276	0.00137466	0.00365824	0.00147694	0.00105021
482	0.000329464	0.00135622	0.000261706	0.00091576	0.00121991	0.00129798	0.00294097	0.00731974	0.00231955	0.00410511	0.00280982	0.00192408	0.000356759	0.000305254	0.0013912	0.0035952	0.00136263	0.00106112
483	0.000316073	0.00136721	0.000256889	0.000933264	0.0012349	0.00133936	0.00301572	0.0070662	0.00228938	0.00408538	0.002793	0.00192011	0.000319427	0.000306779	0.00141012	0.00353945	0.00125868	0.00107203
484	0.000304242	0.0013774	0.000255494	0.000950901	0.00124477	0.00138028	0.00296881	0.00633127	0.00226179	0.00406166	0.00277688	0.00190129	0.000282852	0.000307904	0.00142996	0.00349117	0.00116861	0.00108368
485	0.000294017	0.00138635	0.000257832	0.000968601	0.00124945	0.00141865	0.00277326	0.005393	0.00223672	0.00403497	0.00276175	0.00187336	0.00024772	0.000308721	0.00144916	0.00344873	0.00109392	0.00109679
486	0.000285382	0.00139367	0.000264193	0.000986285	0.00124916	0.00145246	0.0024411	0.0045022	0.00221417	0.00400624	0.00274788	0.00184239	0.00021464	0.00030935	0.00146623	0.00340933	0.00103436	0.00111203
487	0.000278274	0.00139904	0.000274842	0.00100387	0.00124439	0.00147998	0.00202029	0.00378687	0.00219416	0.00397622	0.0027355	0.0018125	0.000184128	0.000309942	0.00147983	0.00336969	0.000988518	0.00112994
488	0.000272595	0.00140226	0.000290026	0.00102128	0.0012359	0.00149997	0.0015764	0.00327034	0.00217682	0.00394547	0.0027248	0.00178589	0.000156587	0.000310668	0.00148889	0.00332663	0.000954365	0.0011509
489	0.000268227	0.00140321	0.00030999	0.00103842	0.00122463	0.0015118	0.00116945	0.00292834	0.00216236	0.00391437	0.00271595	0.00176357	0.000132283	0.000311713	0.00149267	0.00327749	0.000929796	0.00117512
490	0.000265038	0.00140192	0.000334982	0.00105522	0.00121164	0.00151548	0.000837277	0.00272634	0.0021511	0.00388311	0.00270905	0.00174585	0.000111328	0.000313271	0.00149081	0.0032203	0.000912936	0.00120262
491	0.000262895	0.00139851	0.000365286	0.00107159	0.00119804	0.00151162	0.000591447	0.00263073	0.00214339	0.00385169	0.00270418	0.00173248	9.36896e-05	0.000315537	0.0014834	0.00315394	0.000902298	0.00123322
492	0.000261669	0.00139322	0.00040124	0.00108745	0.00118491	0.00150134	0.000423506	0.00260973	0.00213962	0.00381999	0.00270135	0.0017228	7.91993e-05	0.000318703	0.00147091	0.00307816	0.000896793	0.00126664
493	0.000261242	0.00138636	0.000443269	0.00110275	0.00117322	0.00148603	0.000315414	0.00263432	0.00214017	0.00378775	0.00270053	0.00171601	6.75863e-05	0.000322952	0.00145418	0.00299365	0.000895669	0.00130246
494	0.00026151	0.0013783	0.00049191	0.00111742	0.00116381	0.00146725	0.000248338	0.0026802	0.00214533	0.00375469	0.00270164	0.00171136	5.85099e-05	0.000328461	0.00143435	0.0029021	0.00089843	0.00134023
495	0.000262381	0.00136944	0.000547835	0.00113141	0.00115742	0.00144649	0.000207344	0.00272933	0.00215532	0.00372046	0.00270454	0.00170835	5.15964e-05	0.000335399	0.00141274	0.0028062	0.000904742	0.00137953
496	0.000263782	0.00136017	0.000611858	0.00114468	0.00115464	0.00142507	0.000182438	0.00276995	0.00217017	0.00368477	0.00270908	0.00170667	4.64707e-05	0.000343931	0.00139072	0.00270951	0.000914374	0.00141997
497	0.000265652	0.00135084	0.000684934	0.0011572	0.00115602	0.00140407	0.000167654	0.00279556	0.00218973	0.00364739	0.00271502	0.00170619	4.27816e-05	0.000354221	0.00136959	0.00261617	0.000927142	0.00146126
498	0.00026794	0.00134174	0.000768145	0.00116897	0.00116207	0.00138429	0.000159683	0.00280348	0.00221367	0.00360818	0.00272212	0.00170688	4.02179e-05	0.000366439	0.00135041	0.00253043	0.000942879	0.00150323
499	0.000270611	0.00133309	0.000862677	0.00117997	0.00117332	0.00136626	0.000156818	0.00279352	0.0022414	0.00356712	0.0027301	0.00170876	3.85171e-05	0.000380769	0.00133391	0.0024562	0.00096142	0.0015458
500	0.000273632	0.00132501	0.000969817	0.0011902	0.00119027	0.0013503	0.000158436	0.00276701	0.00227217	0.00352432	0.00273865	0.00171185	3.74672e-05	0.000397415	0.0013204	0.00239652	0.000982579	0.00158901
501	0.000276982	0.00131756	0.00109098	0.00119969	0.0012133	0.00133657	0.000164994	0.00272626	0.00230501	0.00348003	0.00274744	0.00171619	3.69029e-05	0.000416616	0.00130977	0.00235325	0.00100615	0.00163294
502	0.00028064	0.00131069	0.00122778	0.00120845	0.00124255	0.00132517	0.000178455	0.00267416	0.00233886	0.00343462	0.00275615	0.00172181	3.67002e-05	0.00043865	0.00130154	0.00232694	0.00103191	0.00167767
503	0.000284589	0.00130433	0.00138209	0.00121652	0.00127771	0.00131614	0.00020301	0.00261404	0.00237255	0.00338855	0.00276445	0.00172878	3.67682e-05	0.000463857	0.00129498	0.00231692	0.00105959	0.00172327
504	0.000288814	0.00129836	0.00155608	0.00122392	0.00131783	0.00130951	0.000245773	0.00254944	0.00240493	0.00334237	0.00277199	0.00173715	3.70424e-05	0.00049265	0.00128926	0.00232151	0.00108893	0.00176975
505	0.000293299	0.00129266	0.00175208	0.00123069	0.00136126	0.00130536	0.000316887	0.00248407	0.00243491	0.00329664	0.00277847	0.00174702	3.74775e-05	0.000525529	0.00128369	0.00233845	0.00111968	0.00181701
506	0.000298027	0.00128712	0.00197206	0.00123688	0.00140559	0.00130378	0.000428214	0.0024216	0.00246156	0.00325195	0.00278359	0.00175846	3.8042e-05	0.000563071	0.00127784	0.00236528	0.00115164	0.00186484
507	0.000302981	0.00128169	0.00221674	0.0012425	0.00144796	0.00130487	0.000590016	0.00236556	0.00248411	0.00320882	0.00278707	0.00177142	3.87138e-05	0.000605889	0.00127171	0.00239973	0.00118471	0.00191293
508	0.00030814	0.00127638	0.00248422	0.0012476	0.00148532	0.00130875	0.000805873	0.00231916	0.00250208	0.00316774	0.00278868	0.00178567	3.9477e-05	0.000654542	0.00126575	0.00244003	0.00121905	0.00196085
509	0.000313482	0.00127124	0.00276857	0.00125221	0.00151497	0.00131555	0.00106747	0.00228514	0.00251524	0.00312907	0.0027882	0.00180061	4.03194e-05	0.000709375	0.00126086	0.00248504	0.00125511	0.00200808
510	0.000318984	0.00126644	0.00305872	0.00125636	0.00153498	0.00132535	0.00135215	0.00226566	0.00252361	0.00309307	0.00278547	0.00181526	4.12313e-05	0.000770309	0.00125825	0.00253433	0.0012937	0.00205407
511	0.000324619	0.00126219	0.00333852	0.00126007	0.00154451	0.0013382	0.00162578	0.0022621	0.00252746	0.00305991	0.00278037	0.00182838	4.22046e-05	0.00083662	0.00125927	0.00258803	0.00133593	0.00209822
512	0.000330359	0.00125875	0.00358845	0.00126336	0.00154396	0.00135405	0.00185172	0.00227501	0.00252721	0.00302964	0.00277281	0.00183871	4.32314e-05	0.00090677	0.00126516	0.00264662	0.00138292	0.00213996
513	0.000336175	0.00125645	0.00378921	0.00126625	0.00153485	0.00137281	0.00200281	0.00230402	0.00252345	0.00300221	0.00276276	0.00184534	4.43046e-05	0.000978374	0.00127693	0.00271066	0.00143527	0.00217877
514	0.000342038	0.0012556	0.00392657	0.00126875	0.00151947	0.00139424	0.0020711	0.00234787	0.00251679	0.00297753	0.00275023	0.00184802	4.54171e-05	0.00104837	0.00129508	0.0027805	0.00149252	0.00221421
515	0.000347915	0.00125653	0.00399616	0.00127088	0.00150041	0.001418	0.00207017	0.00240454	0.00250787	0.00295548	0.00273526	0.0018473	4.65619e-05	0.00111338	0.00131956	0.00285594	0.00155264	0.00224593
516	0.000353777	0.00125955	0.00400594	0.00127264	0.00148019	0.00144364	0.00202828	0.00247158	0.00249727	0.00293592	0.00271796	0.00184436	4.7732e-05	0.00117028	0.00134972	0.00293612	0.00161207	0.0022737
517	0.000359592	0.00126488	0.0039748	0.00127406	0.00146083	0.00147059	0.00197567	0.00254674	0.0024855	0.00291877	0.00269845	0.00184066	4.89205e-05	0.00121671	0.0013843	0.00301939	0.00166641	0.00229743
518	0.000365334	0.00127273	0.00392609	0.00127513	0.00144371	0.0014982	0.00193231	0.00262906	0.00247296	0.00290397	0.00267691	0.00183741	5.01205e-05	0.00125152	0.00142157	0.00310353	0.00171175	0.00231713
519	0.000370974	0.0012832	0.00387798	0.00127587	0.00142954	0.00152577	0.00190185	0.00272031	0.00245998	0.00289154	0.00265353	0.0018353	5.13252e-05	0.00127493	0.00145948	0.00318598	0.00174618	0.00233294
520	0.000376489	0.00129633	0.00383412	0.0012763	0.00141849	0.00155259	0.00187394	0.00282652	0.00244678	0.00288156	0.00262855	0.00183429	5.25276e-05	0.0012884	0.00149581	0.00326429	0.00177085	0.00234511
521	0.000381858	0.00131206	0.00377972	0.00127642	0.00141031	0.00157796	0.00183275	0.00295833	0.00243353	0.00287414	0.0026022	0.00183383	5.37211e-05	0.00129422	0.00152843	0.00333648	0.00179004	0.00235397
522	0.000387064	0.00133028	0.00368617	0.00127626	0.0014046	0.0016013	0.00176681	0.00312888	0.00242035	0.00286946	0.00257475	0.00183315	5.48992e-05	0.00129505	0.00155544	0.00340136	0.00181003	0.00235992
523	0.000392096	0.0013508	0.00352342	0.00127583	0.00140093	0.00162216	0.0016756	0.003348	0.0024073	0.00286765	0.00254647	0.00183165	5.60553e-05	0.00129339	0.00157541	0.00345855	0.00183715	0.00236343
524	0.000396947	0.00137338	0.00327476	0.00127514	0.00139891	0.00164024	0.00157079	0.00361336	0.00239447	0.00286887	0.00251763	0.00182908	5.71834e-05	0.00129127	0.00158746	0.00350838	0.00187573	0.00236502
525	0.000401616	0.00139775	0.00294674	0.0012742	0.00139831	0.00165547	0.00147229	0.00390225	0.00238189	0.00287318	0.00248851	0.00182557	5.82772e-05	0.00129014	0.00159135	0.00355144	0.00192669	0.00236522
526	0.000406109	0.00142364	0.00256913	0.00127303	0.00139899	0.001668	0.00140186	0.00416964	0.00236963	0.0028806	0.00245938	0.00182135	5.9331e-05	0.00129085	0.00158747	0.00358813	0.00198744	0.0023646
527	0.000410436	0.00145078	0.00218533	0.00127163	0.00140095	0.00167815	0.00137672	0.00435685	0.00235772	0.00289102	0.00243046	0.0018166	6.03391e-05	0.00129385	0.00157675	0.00361825	0.00205295	0.00236374
528	0.000414616	0.0014789	0.00183831	0.00127	0.00140423	0.00168645	0.00140538	0.00441005	0.00234619	0.00290426	0.00240201	0.00181139	6.12963e-05	0.00129931	0.00156059	0.00364079	0.00211765	0.00236318
529	0.000418673	0.00150778	0.00155888	0.00126813	0.00140895	0.00169355	0.00148617	0.0043009	0.00233502	0.00292	0.00237421	0.00180583	6.21976e-05	0.0013073	0.00154059	0.00365391	0.00217734	0.00236345
530	0.000422637	0.00153721	0.00136043	0.00126602	0.00141522	0.00170021	0.00160837	0.00403883	0.00232419	0.00293782	0.00234724	0.00180027	6.30381e-05	0.00131781	0.00151848	0.00365528	0.00223038	0.00236504
531	0.000426545	0.001567	0.00124061	0.00126364	0.00142317	0.00170718	0.00175476	0.00366805	0.00231357	0.00295719	0.00232125	0.00179528	6.38136e-05	0.00133077	0.00149584	0.00364259	0.0022778	0.00236835
532	0.000430437	0.00159696	0.00118693	0.00126098	0.00143296	0.00171521	0.00190484	0.00325085	0.00230297	0.00297744	0.00229635	0.0017915	6.45201e-05	0.00134602	0.00147401	0.00361407	0.00232234	0.00237373
533	0.00043436	0.00162688	0.0011829	0.00125799	0.00144471	0.00172493	0.0020379	0.00284624	0.00229208	0.00299782	0.0022726	0.00178933	6.51537e-05	0.0013633	0.00145401	0.00356892	0.00236695	0.00238143
534	0.000438361	0.00165651	0.00121239	0.00125466	0.00145853	0.00173685	0.00213568	0.00249406	0.00228049	0.00301744	0.00225005	0.00178873	6.57113e-05	0.00138218	0.00143643	0.00350756	0.00241333	0.00239159
535	0.000442493	0.00168551	0.00126166	0.00125093	0.00147447	0.00175127	0.0021844	0.00221015	0.00226769	0.0030353	0.00222869	0.00178922	6.619e-05	0.00140211	0.00142148	0.00343154	0.00246104	0.00240427
536	0.000446806	0.0017135	0.00131969	0.00124677	0.00149251	0.00176833	0.00217604	0.00199106	0.0022531	0.00305034	0.0022085	0.00179001	6.65872e-05	0.00142247	0.00140905	0.00334326	0.00250744	0.00241943
537	0.000451352	0.00173997	0.00137785	0.00124215	0.0015125	0.00178792	0.00210897	0.00182319	0.00223615	0.00306139	0.00218941	0.00179022	6.69009e-05	0.0014426	0.00139872	0.00324555	0.00254832	0.00243694
538	0.000456183	0.00176437	0.00142937	0.00123703	0.00153408	0.00180975	0.00198762	0.00169101	0.00221631	0.0030673	0.00217131	0.00178906	6.71295e-05	0.00146186	0.00138993	0.00314114	0.00257912	0.0024566
539	0.000461343	0.00178608	0.00146915	0.00123139	0.00155667	0.00183334	0.00182153	0.00158182	0.00219319	0.00306691	0.00215408	0.00178598	6.72718e-05	0.00147974	0.00138201	0.00303234	0.00259605	0.00247812
540	0.000466878	0.00180449	0.00149372	0.00122521	0.0015794	0.00185804	0.00162373	0.00148712	0.00216661	0.00305924	0.00213759	0.00178061	6.7327e-05	0.00149588	0.00137427	0.00292075	0.00259715	0.0025012
541	0.000472824	0.00181898	0.00150135	0.00121849	0.00160113	0.00188309	0.00140884	0.00140205	0.00213666	0.00304345	0.00212165	0.00177277	6.72948e-05	0.00151007	0.00136612	0.00280732	0.00258277	0.00252546
542	0.000479213	0.00182906	0.00149203	0.00121123	0.00162049	0.00190764	0.00119114	0.00132411	0.0021037	0.00301904	0.00210611	0.00176243	6.71753e-05	0.00152233	0.00135706	0.00269244	0.00255553	0.00255053
543	0.000486068	0.00183434	0.00146745	0.00120346	0.00163593	0.00193082	0.000982999	0.00125213	0.0020684	0.00298582	0.00209076	0.00174964	6.69693e-05	0.0015328	0.00134677	0.00257629	0.00251978	0.00257599
544	0.000493403	0.00183461	0.00143072	0.00119522	0.00164592	0.00195175	0.000793776	0.00118563	0.00203161	0.00294401	0.00207544	0.00173453	6.66776e-05	0.00154177	0.00133507	0.00245909	0.00248077	0.00260146
545	0.000501222	0.00182982	0.00138607	0.00118656	0.00164903	0.0019696	0.000629378	0.00112442	0.00199436	0.00289422	0.00205995	0.00171727	6.63019e-05	0.00154963	0.001322	0.00234144	0.00244379	0.00262654
546	0.000509516	0.00182013	0.00133845	0.00117756	0.00164419	0.00198365	0.000492357	0.00106855	0.0019577	0.00283741	0.00204411	0.00169809	6.5844e-05	0.00155675	0.00130774	0.00222454	0.00241343	0.00265086
547	0.000518264	0.00180585	0.00129341	0.00116829	0.00163074	0.00199328	0.000382458	0.00101821	0.00192266	0.00277483	0.00202778	0.00167731	6.53066e-05	0.00156353	0.00129266	0.00211019	0.00239309	0.00267408
548	0.000527429	0.00178743	0.00125763	0.00115885	0.00160865	0.00199804	0.000297387	0.000973791	0.00189012	0.00270791	0.0020108	0.00165529	6.46924e-05	0.00157026	0.00127721	0.00200074	0.00238461	0.00269589
549	0.000536953	0.00176542	0.00124084	0.00114936	0.00157845	0.00199763	0.000233645	0.000935872	0.00186078	0.00263814	0.00199306	0.00163255	6.40047e-05	0.00157717	0.00126197	0.00189883	0.00238801	0.00271607
550	0.000546763	0.00174039	0.00125952	0.00113992	0.00154125	0.00199193	0.000187275	0.00090524	0.00183509	0.00256692	0.00197446	0.00160983	6.32475e-05	0.00158443	0.00124754	0.00180705	0.00240131	0.00273442
551	0.00055676	0.00171295	0.00134082	0.00113066	0.00149861	0.00198099	0.000154434	0.000882866	0.00181328	0.00249551	0.00195492	0.00158815	6.24249e-05	0.00159209	0.00123453	0.00172755	0.00242063	0.00275084
552	0.000566821	0.00168363	0.00152155	0.00112169	0.0014524	0.001965	0.000131793	0.000869871	0.00179534	0.00242491	0.0019344	0.00156879	6.15417e-05	0.00160021	0.00122352	0.00166168	0.00244075	0.0027653
553	0.000576798	0.00165293	0.00183431	0.00111313	0.00140458	0.00194428	0.000116787	0.000867431	0.0017811	0.00235584	0.0019129	0.0015529	6.0603e-05	0.00160884	0.00121501	0.00160973	0.00245626	0.00277783
554	0.000586517	0.00162124	0.0022791	0.00110511	0.00135703	0.00191923	0.000107813	0.000876655	0.00177022	0.00228873	0.00189043	0.00154077	5.96145e-05	0.00161809	0.00120941	0.00157079	0.00246307	0.00278856
555	0.000595776	0.0015889	0.00279464	0.00109772	0.00131141	0.00189034	0.000104469	0.00089841	0.00176225	0.00222372	0.00186703	0.00153111	5.85821e-05	0.00162812	0.00120698	0.00154287	0.00245988	0.00279765
556	0.000604352	0.00155615	0.0032584	0.00109106	0.00126905	0.00185809	0.000107914	0.000933114	0.0017567	0.00216078	0.00184277	0.00152103	5.75124e-05	0.00163922	0.00120786	0.00152307	0.00244893	0.00280534
557	0.000612001	0.00152317	0.00353336	0.0010852	0.0012309	0.00182298	0.000121347	0.00098052	0.001753	0.00209971	0.00181776	0.00150722	5.64123e-05	0.00165174	0.00121206	0.00150798	0.00243583	0.00281189
558	0.000618466	0.00149014	0.00354077	0.00108023	0.0011975	0.00178551	0.000150452	0.00103952	0.00175063	0.00204026	0.0017921	0.00148784	5.52893e-05	0.00166608	0.00121945	0.00149408	0.00242811	0.00281759
559	0.000623487	0.00145717	0.00330636	0.00107619	0.00116908	0.00174615	0.000203442	0.00110801	0.00174905	0.00198218	0.00176593	0.0014637	5.41511e-05	0.00168261	0.0012298	0.0014782	0.00243295	0.00282274
560	0.000626805	0.00142439	0.00294221	0.00107312	0.00114562	0.00170542	0.000290165	0.00118284	0.00174777	0.00192527	0.0017394	0.00143775	5.30061e-05	0.00170159	0.00124279	0.00145786	0.00245457	0.00282761
561	0.000628179	0.00139196	0.00257965	0.00107102	0.00112688	0.00166383	0.000419843	0.00125991	0.00174632	0.00186939	0.00171266	0.00141343	5.18629e-05	0.00172313	0.00125805	0.00143157	0.00249208	0.00283248
562	0.000627398	0.00136001	0.00230592	0.00106991	0.00111255	0.00162196	0.000597435	0.00133442	0.00174433	0.00181453	0.00168588	0.00139292	5.07308e-05	0.00174705	0.00127517	0.00139889	0.00253877	0.00283755
563	0.000624287	0.00132875	0.00214369	0.00106977	0.00110229	0.00158046	0.000819548	0.0014012	0.00174146	0.00176076	0.00165921	0.00137663	4.96192e-05	0.00177292	0.00129376	0.00136044	0.00258364	0.002843
564	0.000618724	0.00129835	0.00207056	0.00107057	0.00109579	0.00154003	0.00107166	0.0014552	0.0017375	0.00170825	0.00163282	0.00136355	4.85381e-05	0.00180009	0.00131344	0.00131768	0.00261485	0.00284889
565	0.000610648	0.00126904	0.00205072	0.00107227	0.00109281	0.00150145	0.00132887	0.00149196	0.00173227	0.00165721	0.00160686	0.00135216	4.74977e-05	0.00182775	0.00133387	0.00127271	0.00262399	0.00285521
566	0.000600065	0.00124103	0.00205578	0.0010748	0.00109321	0.00146551	0.00156169	0.00150812	0.00172574	0.00160785	0.00158146	0.00134106	4.65088e-05	0.00185507	0.00135476	0.00122791	0.00260901	0.00286186
567	0.000587049	0.00121456	0.0020705	0.0010781	0.00109689	0.00143298	0.00174679	0.00150178	0.00171792	0.00156041	0.00155676	0.00132937	4.55822e-05	0.00188137	0.00137587	0.00118574	0.00257447	0.00286861
568	0.000571747	0.00118984	0.00208965	0.0010821	0.00110385	0.00140452	0.00187995	0.00147267	0.00170894	0.00151507	0.00153285	0.00131702	4.47292e-05	0.00190625	0.00139702	0.00114846	0.0025291	0.00287515
569	0.000554373	0.00116707	0.00211314	0.00108671	0.00111408	0.00138063	0.00198582	0.00142219	0.00169902	0.00147195	0.00150984	0.0013048	4.3961e-05	0.00192971	0.00141806	0.00111798	0.0024821	0.00288106
570	0.000535197	0.00114644	0.00214246	0.00109184	0.00112752	0.0013616	0.00211691	0.0013532	0.00168842	0.0014311	0.00148778	0.00129423	4.32893e-05	0.00195214	0.00143889	0.00109582	0.00244027	0.00288592
571	0.000514541	0.00112811	0.00217882	0.0010974	0.00114404	0.00134742	0.0023352	0.00126969	0.00167748	0.00139251	0.00146674	0.00128705	4.27254e-05	0.00197435	0.00145938	0.00108306	0.00240688	0.0028893
572	0.000492759	0.00111222	0.00222229	0.0011033	0.00116342	0.00133782	0.00267816	0.00117628	0.00166659	0.00135608	0.00144673	0.00128434	4.2281e-05	0.0019974	0.00147941	0.00108034	0.00238224	0.00289082
573	0.000470228	0.00109887	0.00227147	0.00110944	0.00118529	0.00133224	0.00312566	0.00107776	0.00165617	0.00132169	0.00142777	0.00128565	4.19671e-05	0.00202246	0.00149882	0.00108793	0.0023651	0.00289022
574	0.000447327	0.00108812	0.00232354	0.00111573	0.00120918	0.00132989	0.00359358	0.000978606	0.00164664	0.00128915	0.00140984	0.00128886	4.1795e-05	0.00205067	0.0015174	0.00110566	0.00235386	0.00288738
575	0.000424429	0.00107998	0.00237447	0.00112207	0.00123461	0.00132978	0.00396913	0.000882642	0.00163842	0.00125829	0.00139293	0.00129102	4.1775e-05	0.00208292	0.00153488	0.00113302	0.00234725	0.00288234
576	0.00040188	0.00107443	0.00241941	0.00112838	0.0012611	0.00133087	0.00417042	0.000792782	0.00163193	0.00122894	0.00137697	0.00128995	4.19172e-05	0.00211979	0.0015509	0.00116907	0.00234446	0.00287529
577	0.000379995	0.00107139	0.00245318	0.00113456	0.00128834	0.0013321	0.00418781	0.000710957	0.00162751	0.00120095	0.00136192	0.00128518	4.22309e-05	0.00216148	0.00156506	0.00121249	0.00234501	0.00286653
578	0.000359043	0.00107074	0.00247081	0.00114054	0.00131622	0.00133253	0.0040758	0.000638149	0.00162548	0.00117423	0.00134772	0.00127788	4.27243e-05	0.00220779	0.00157687	0.0012616	0.00234859	0.00285644
579	0.000339246	0.00107231	0.00246807	0.00114624	0.00134491	0.00133136	0.00390564	0.000574525	0.00162606	0.00114874	0.00133427	0.00126967	4.34048e-05	0.00225821	0.00158585	0.00131446	0.002355	0.00284539
580	0.000320774	0.00107586	0.0024419	0.00115158	0.00137483	0.00132806	0.00371943	0.000519631	0.0016294	0.00112451	0.0013215	0.00126148	4.42783e-05	0.00231196	0.00159147	0.001369	0.00236418	0.0028337
581	0.000303744	0.00108112	0.00239071	0.00115649	0.00140663	0.00132233	0.00351795	0.000472604	0.00163553	0.00110162	0.00130933	0.00125329	4.53494e-05	0.00236813	0.00159324	0.00142312	0.00237631	0.00282158
582	0.000288227	0.00108779	0.00231453	0.00116092	0.00144102	0.00131415	0.00328081	0.000432373	0.00164437	0.00108018	0.00129768	0.0012446	4.6621e-05	0.00242575	0.00159073	0.0014749	0.00239195	0.00280909
583	0.000274247	0.00109551	0.00221498	0.00116482	0.00147864	0.00130372	0.00299439	0.000397821	0.00165572	0.00106037	0.00128645	0.00123513	4.80942e-05	0.00248391	0.00158364	0.00152274	0.00241206	0.00279616
584	0.000261791	0.00110393	0.00209511	0.00116812	0.00151984	0.00129145	0.00266605	0.000367908	0.00166928	0.00104235	0.00127557	0.00122511	4.97681e-05	0.00254183	0.00157175	0.00156539	0.00243784	0.00278257
585	0.000250815	0.00111267	0.00195907	0.0011708	0.00156453	0.00127788	0.00232052	0.000341742	0.00168461	0.00102631	0.00126496	0.0012152	5.16399e-05	0.0025989	0.00155506	0.00160203	0.00247027	0.00276799
586	0.000241248	0.00112135	0.00181177	0.00117281	0.00161205	0.0012636	0.00198722	0.000318616	0.0017012	0.00101241	0.00125456	0.00120611	5.37042e-05	0.00265477	0.0015337	0.00163222	0.00250938	0.00275206
587	0.000233002	0.00112964	0.00165838	0.00117413	0.00166113	0.00124924	0.00168885	0.000298004	0.00171845	0.00100077	0.00124431	0.00119834	5.59534e-05	0.00270934	0.00150802	0.00165579	0.00255359	0.00273437
588	0.00022598	0.0011372	0.00150403	0.00117474	0.0017099	0.00123537	0.00143646	0.000279549	0.00173572	0.0009915	0.00123415	0.001192	5.83777e-05	0.00276278	0.0014785	0.00167276	0.00259928	0.00271458
589	0.000220074	0.00114376	0.00135341	0.00117463	0.00175609	0.00122247	0.0012306	0.000263033	0.00175237	0.000984617	0.00122404	0.00118688	6.09644e-05	0.00281554	0.0014458	0.00168328	0.00264104	0.00269239
590	0.00021518	0.00114909	0.00121053	0.00117379	0.00179716	0.00121093	0.00106553	0.000248343	0.00176776	0.000980099	0.00121395	0.00118257	6.36987e-05	0.0028683	0.00141067	0.00168754	0.00267274	0.00266764
591	0.000211192	0.00115299	0.00107858	0.00117223	0.00183061	0.00120103	0.000933479	0.00023544	0.00178134	0.000977855	0.00120384	0.00117858	6.65631e-05	0.00292196	0.00137394	0.00168583	0.0026891	0.00264023
592	0.00020801	0.00115536	0.000959905	0.00116995	0.0018542	0.00119294	0.000827445	0.000224339	0.00179262	0.000977734	0.00119371	0.00117445	6.95379e-05	0.00297753	0.00133644	0.00167858	0.00268718	0.00261023
593	0.000205541	0.00115614	0.000855992	0.00116698	0.00186622	0.00118671	0.00074223	0.000215083	0.00180126	0.000979529	0.00118353	0.00116981	7.26011e-05	0.00303609	0.00129899	0.00166643	0.0026672	0.0025778
594	0.000203701	0.00115531	0.00076762	0.00116333	0.00186561	0.00118235	0.00067432	0.000207732	0.00180702	0.000982982	0.00117329	0.00116443	7.57285e-05	0.0030986	0.00126229	0.00165031	0.00263218	0.00254318
595	0.000202411	0.00115291	0.000694982	0.00115905	0.00185212	0.00117978	0.000621299	0.000202354	0.00180982	0.000987796	0.00116301	0.00115815	7.88942e-05	0.00316582	0.00122697	0.00163139	0.00258673	0.00250671
596	0.000201604	0.00114904	0.000637848	0.00115418	0.00182625	0.00117889	0.000581262	0.000199018	0.00180972	0.000993649	0.00115268	0.00115096	8.20706e-05	0.00323814	0.00119349	0.00161111	0.00253548	0.00246875
597	0.000201218	0.00114383	0.000595707	0.00114875	0.0017892	0.00117955	0.000552444	0.000197795	0.00180688	0.00100021	0.00114231	0.00114292	8.5229e-05	0.00331545	0.00116214	0.00159099	0.00248173	0.0024297
598	0.000201202	0.00113744	0.000567891	0.00114283	0.00174274	0.00118162	0.000533077	0.000198756	0.00180159	0.00100713	0.00113191	0.00113417	8.83394e-05	0.00339704	0.00113305	0.00157247	0.00242694	0.00238994
599	0.00020151	0.00113007	0.000553671	0.00113648	0.00168899	0.00118496	0.000521385	0.000201973	0.0017942	0.00101411	0.0011215	0.00112493	9.13715e-05	0.00348161	0.0011062	0.00155679	0.00237101	0.00234983
600	0.000202101	0.00112192	0.000552327	0.00112975	0.00163024	0.00118942	0.000515664	0.000207522	0.00178509	0.00102086	0.0011111	0.00111541	9.42947e-05	0.00356723	0.00108144	0.0015448	0.00231301	0.00230967
601	0.000202943	0.00111323	0.000563235	0.00112272	0.00156875	0.00119488	0.000514361	0.000215481	0.00177468	0.00102714	0.00110071	0.00110588	9.70787e-05	0.00365155	0.0010585	0.00153693	0.00225205	0.00226973
602	0.000204008	0.00110426	0.000586004	0.00111546	0.0015066	0.00120119	0.00051615	0.000225937	0.00176334	0.00103278	0.00109036	0.00109658	9.96937e-05	0.00373195	0.00103707	0.00153316	0.00218798	0.00223018
603	0.00020527	0.00109528	0.000620778	0.00110803	0.00144554	0.00120825	0.000519983	0.000238979	0.00175142	0.00103767	0.00108006	0.00108775	0.000102111	0.00380581	0.00101679	0.00153318	0.00212153	0.00219116
604	0.000206708	0.00108657	0.00066876	0.00110053	0.00138695	0.00121594	0.000525145	0.0002547	0.0017392	0.00104176	0.00106984	0.00107962	0.000104304	0.00387074	0.000997303	0.00153648	0.00205416	0.00215273
605	0.000208305	0.00107841	0.000733015	0.00109301	0.00133181	0.00122414	0.000531306	0.00027319	0.0017269	0.00104509	0.00105972	0.00107244	0.000106247	0.00392482	0.000978316	0.0015426	0.0019876	0.00211489
606	0.000210041	0.00107112	0.00081934	0.00108556	0.00128071	0.00123274	0.000538613	0.000294531	0.00171466	0.00104776	0.00104971	0.00106648	0.000107918	0.00396673	0.00095959	0.00155124	0.00192338	0.00207763
607	0.000211902	0.00106497	0.000936679	0.00107825	0.00123391	0.00124163	0.000547804	0.000318789	0.00170255	0.00104994	0.00103984	0.00106209	0.000109296	0.00399586	0.000940973	0.00156238	0.00186244	0.00204089
608	0.00021387	0.00106029	0.00109619	0.00107114	0.0011914	0.00125071	0.000560357	0.000346	0.00169057	0.00105184	0.00103012	0.00105963	0.000110364	0.00401228	0.000922413	0.00157631	0.00180503	0.00200464
609	0.000215927	0.00105734	0.00130808	0.00106429	0.00115295	0.00125986	0.000578606	0.000376159	0.00167866	0.0010537	0.00102057	0.00105944	0.000111109	0.00401665	0.000903951	0.00159351	0.00175086	0.00196883
610	0.000218054	0.00105639	0.00157608	0.00105777	0.00111824	0.00126898	0.000605769	0.000409207	0.00166674	0.00105578	0.00101122	0.00106169	0.00011152	0.00401007	0.000885718	0.00161454	0.00169941	0.00193346
611	0.000220226	0.00105768	0.0018911	0.00105162	0.00108685	0.00127795	0.000645771	0.000445013	0.00165467	0.00105832	0.00100208	0.00106625	0.000111591	0.00399398	0.000867915	0.00163983	0.00165029	0.00189853
612	0.000222417	0.0010614	0.00222711	0.00104589	0.00105837	0.00128666	0.00070276	0.000483363	0.00164233	0.00106155	0.000993176	0.00107251	0.00011132	0.00396996	0.000850794	0.00166951	0.00160344	0.00186413
613	0.000224595	0.00106767	0.00254284	0.00104061	0.00103242	0.00129501	0.000780274	0.000523945	0.00162957	0.00106564	0.000984524	0.00107949	0.000110706	0.00393965	0.000834634	0.0017032	0.00155925	0.00183035
614	0.000226723	0.00107655	0.00279098	0.0010358	0.00100867	0.00130288	0.000880101	0.000566342	0.00161625	0.00107069	0.00097614	0.00108598	0.000109755	0.00390466	0.000819714	0.00173995	0.00151836	0.00179736
615	0.000228761	0.00108801	0.00293241	0.0010315	0.00098688	0.00131016	0.00100104	0.000610024	0.00160224	0.00107674	0.000968042	0.00109088	0.000108475	0.00386648	0.000806289	0.00177825	0.00148146	0.00176533
616	0.000230662	0.00110192	0.00294981	0.00102769	0.000966881	0.00131675	0.00113794	0.000654354	0.00158743	0.00108373	0.000960244	0.00109356	0.00010688	0.0038265	0.000794569	0.00181611	0.00144903	0.00173449
617	0.000232373	0.00111806	0.00285388	0.00102438	0.000948583	0.00132253	0.00128136	0.000698589	0.00157174	0.00109153	0.000952758	0.00109394	0.000104983	0.00378592	0.000784704	0.00185126	0.00142121	0.00170505
618	0.00023384	0.00113609	0.00267922	0.00102157	0.00093197	0.00132741	0.00141826	0.000741898	0.00155509	0.00109992	0.000945594	0.00109246	0.000102803	0.00374579	0.000776775	0.00188138	0.00139777	0.00167722
619	0.000235004	0.00115555	0.00247173	0.00101922	0.000917081	0.00133129	0.00153376	0.00078338	0.00153744	0.00110862	0.000938758	0.00108978	0.000100362	0.00370694	0.000770785	0.00190438	0.00137834	0.00165121
620	0.000235804	0.0011759	0.00227383	0.0010173	0.000903999	0.00133408	0.00161379	0.000822095	0.00151876	0.00111729	0.000932254	0.0010865	9.76833e-05	0.00367001	0.000766668	0.00191864	0.00136268	0.00162717
621	0.00023618	0.00119651	0.00211389	0.00101579	0.000892829	0.00133568	0.00164787	0.000857095	0.00149905	0.00112555	0.00092608	0.0010829	9.47922e-05	0.00363542	0.000764293	0.00192325	0.00135099	0.00160521
622	0.000236072	0.00121668	0.00200286	0.00101463	0.000883685	0.00133602	0.00163154	0.000887463	0.00147831	0.00113303	0.000920231	0.00107902	9.1716e-05	0.00360337	0.000763481	0.00191803	0.00134412	0.00158541
623	0.000235426	0.0012357	0.00193746	0.00101378	0.000876666	0.00133504	0.00156749	0.000912348	0.00145659	0.00113936	0.000914696	0.00107468	8.84831e-05	0.00357389	0.000764018	0.0019036	0.00134348	0.00156773
624	0.000234191	0.00125283	0.00190644	0.00101318	0.000871846	0.00133268	0.00146521	0.000931008	0.00143391	0.00114421	0.00090946	0.00106969	8.51224e-05	0.0035468	0.000765677	0.00188125	0.00135063	0.00155212
625	0.000232326	0.00126734	0.0018966	0.00101276	0.00086926	0.00132888	0.00133917	0.000942843	0.00141035	0.00114731	0.000904502	0.00106393	8.16634e-05	0.00352177	0.000768237	0.00185271	0.00136648	0.00153842
626	0.000229796	0.0012786	0.00189657	0.00101246	0.000868886	0.00132363	0.00120618	0.000947423	0.00138595	0.00114846	0.000899795	0.00105743	7.81353e-05	0.00349839	0.000771503	0.00181995	0.00139039	0.00152641
627	0.000226582	0.00128602	0.00189827	0.00101222	0.000870647	0.00131689	0.00108243	0.000944516	0.00136081	0.00114754	0.000895308	0.00105029	7.4567e-05	0.00347614	0.000775318	0.00178495	0.00141927	0.00151584
628	0.000222672	0.00128913	0.00189676	0.00101196	0.000874395	0.00130865	0.000981197	0.000934097	0.00133501	0.00114453	0.000891005	0.00104262	7.09864e-05	0.00345449	0.000779584	0.0017494	0.00144743	0.00150637
629	0.000218072	0.00128757	0.00188946	0.00101161	0.000879917	0.00129893	0.000911437	0.000916349	0.00130863	0.00113948	0.000886843	0.00103453	6.74203e-05	0.00343291	0.000784265	0.00171469	0.00146719	0.00149765
630	0.0002128	0.00128111	0.00187528	0.00101111	0.000886927	0.00128773	0.000877443	0.000891664	0.00128177	0.00113253	0.000882776	0.00102607	6.38939e-05	0.0034109	0.000789392	0.00168174	0.00147048	0.0014893
631	0.000206887	0.00126963	0.00185399	0.0010104	0.00089507	0.00127509	0.00087935	0.000860616	0.00125452	0.00112389	0.000878754	0.00101722	6.04309e-05	0.00338804	0.000795065	0.0016511	0.00145088	0.00148092
632	0.00020038	0.00125316	0.00182586	0.00100939	0.000903927	0.00126103	0.000914122	0.000823942	0.001227	0.00111382	0.000874723	0.00100793	5.70529e-05	0.00336399	0.000801446	0.00162302	0.00140551	0.00147215
633	0.000193335	0.00123183	0.00179144	0.00100804	0.000913013	0.00124559	0.000976667	0.000782504	0.0011993	0.00110259	0.000870627	0.00099811	5.37794e-05	0.00333852	0.000808743	0.00159756	0.00133599	0.00146262
634	0.000185824	0.00120589	0.00175142	0.00100629	0.00092179	0.00122885	0.00106085	0.000737253	0.00117151	0.00109052	0.000866407	0.000987656	5.06279e-05	0.00331152	0.000817203	0.0015747	0.00124812	0.001452
635	0.000177923	0.0011757	0.00170664	0.00100408	0.000929668	0.00121084	0.00116031	0.000689188	0.00114374	0.00107792	0.000862005	0.000976481	4.76133e-05	0.00328302	0.000827083	0.00155441	0.00115036	0.00144003
636	0.000169718	0.0011417	0.00165801	0.00100136	0.000936026	0.00119166	0.00126905	0.000639316	0.00111608	0.00106506	0.000857361	0.000964514	4.47486e-05	0.00325315	0.000838639	0.00153672	0.00105177	0.00142647
637	0.000161299	0.00110443	0.00160656	0.000998085	0.00094022	0.00117136	0.00138196	0.000588612	0.00108861	0.0010522	0.000852418	0.00095171	4.20441e-05	0.00322218	0.000852091	0.00152166	0.000960052	0.00141118
638	0.00015276	0.00106448	0.00155347	0.000994223	0.000941612	0.00115004	0.00149516	0.000537989	0.00106142	0.00103956	0.000847118	0.000938066	3.95083e-05	0.00319048	0.00086761	0.00150921	0.000880313	0.00139405
639	0.000144192	0.00102253	0.00150009	0.000989736	0.000939597	0.00112781	0.00160625	0.000488268	0.00103457	0.0010273	0.00084141	0.000923624	3.71473e-05	0.00315846	0.000885289	0.00149926	0.000814805	0.00137503
640	0.000135684	0.000979267	0.00144802	0.000984597	0.000933635	0.00110475	0.00171428	0.000440157	0.00100814	0.00101555	0.000835243	0.000908473	3.4965e-05	0.0031266	0.000905129	0.0014915	0.000763381	0.00135414
641	0.000127322	0.000935413	0.0013991	0.000978781	0.000923289	0.00108101	0.0018194	0.000394241	0.000982177	0.00100439	0.000828572	0.000892742	3.29639e-05	0.00309538	0.000927024	0.00148543	0.000724365	0.00133143
642	0.000119184	0.000891674	0.00135536	0.000972272	0.000908268	0.00105671	0.00192203	0.000350974	0.000956733	0.000993859	0.000821359	0.000876581	3.11443e-05	0.00306523	0.000950754	0.00148032	0.000695415	0.00130701
643	0.000111339	0.000848723	0.00131895	0.000965055	0.000888456	0.00103202	0.00202182	0.000310682	0.000931845	0.000983957	0.00081357	0.000860133	2.95051e-05	0.00303651	0.000975984	0.00147529	0.000674142	0.001281
644	0.000103849	0.000807175	0.00129194	0.000957122	0.000863948	0.00100709	0.00211648	0.000273568	0.000907542	0.000974666	0.000805179	0.000843505	2.80438e-05	0.00300949	0.00100228	0.00146936	0.000658396	0.00125354
645	9.67618e-05	0.000767558	0.00127603	0.000948469	0.00083506	0.000982127	0.00220097	0.000239725	0.000883843	0.000965944	0.000796167	0.000826736	2.67566e-05	0.00298427	0.0010291	0.00146157	0.000646307	0.0012248
646	9.01176e-05	0.000730302	0.00127228	0.000939096	0.000802336	0.000957327	0.00226741	0.000209151	0.000860759	0.00095774	0.000786522	0.00080979	2.56389e-05	0.00296082	0.00105587	0.00145106	0.000636189	0.00119494
647	8.39444e-05	0.000695722	0.00128071	0.000929007	0.000766529	0.000932909	0.00230599	0.000181762	0.000838294	0.000949993	0.00077624	0.000792564	2.4685e-05	0.00293894	0.00108196	0.00143714	0.000626452	0.00116414
648	7.826e-05	0.000664017	0.00130009	0.00091821	0.000728569	0.000909096	0.00230673	0.000157415	0.000816442	0.000942645	0.000765324	0.000774928	2.38885e-05	0.0029183	0.00110676	0.00141937	0.000615598	0.00113256
649	7.30723e-05	0.000635271	0.00132777	0.000906717	0.000689515	0.00088611	0.00226187	0.00013592	0.000795194	0.000935639	0.000753787	0.000756767	2.32427e-05	0.00289844	0.00112969	0.00139755	0.000602335	0.00110037
650	6.838e-05	0.000609465	0.00135975	0.000894541	0.000650496	0.000864164	0.002168	0.000117057	0.000774532	0.000928921	0.000741646	0.000738038	2.27403e-05	0.00287884	0.00115026	0.00137176	0.000585758	0.00106772
651	6.4174e-05	0.000586489	0.00139098	0.000881701	0.000612642	0.000843445	0.00202753	0.000100592	0.000754437	0.000922446	0.000728928	0.000718798	2.23739e-05	0.00285896	0.00116808	0.00134226	0.000565541	0.00103477
652	6.04385e-05	0.000566165	0.00141583	0.000868217	0.000577017	0.000824107	0.00184875	8.62827e-05	0.000734884	0.000916172	0.000715665	0.000699223	2.21359e-05	0.00283829	0.00118292	0.00130952	0.000542069	0.00100165
653	5.71519e-05	0.000548267	0.00142883	0.000854111	0.000544563	0.000806249	0.00164462	7.3893e-05	0.000715846	0.000910064	0.000701896	0.00067958	2.20189e-05	0.00281641	0.00119467	0.00127414	0.000516435	0.000968503
654	5.42885e-05	0.000532537	0.00142532	0.000839411	0.000516044	0.000789912	0.00143049	6.31969e-05	0.000697297	0.00090409	0.000687663	0.000660188	2.20154e-05	0.00279302	0.0012034	0.00123682	0.000490301	0.000935467
655	5.18196e-05	0.000518707	0.00140218	0.000824143	0.00049201	0.00077506	0.00122147	5.39843e-05	0.000679208	0.000898222	0.000673015	0.000641364	2.2118e-05	0.002768	0.00120931	0.00119831	0.000465645	0.000902667
656	4.97143e-05	0.000506513	0.00135825	0.000808339	0.000472775	0.000761576	0.0010301	4.60631e-05	0.000661552	0.00089243	0.000658003	0.000623379	2.23199e-05	0.00274138	0.00121272	0.00115939	0.000444437	0.000870226
657	4.79412e-05	0.000495706	0.00129456	0.00079203	0.000458413	0.000749265	0.000864897	3.92608e-05	0.000644302	0.000886689	0.000642684	0.000606423	2.26141e-05	0.00271332	0.00121402	0.00112085	0.000428339	0.000838265
658	4.64684e-05	0.000486061	0.00121416	0.000775253	0.000448763	0.00073785	0.000729913	3.34249e-05	0.000627435	0.00088097	0.000627113	0.000590596	2.29943e-05	0.00268407	0.00121366	0.00108343	0.000418458	0.000806901
659	4.5265e-05	0.000477377	0.00112171	0.000758042	0.000443453	0.000726992	0.000625209	2.84214e-05	0.000610928	0.000875244	0.000611349	0.000575909	2.34545e-05	0.00265394	0.00121208	0.00104782	0.000415217	0.000776247
660	4.43016e-05	0.000469485	0.00102286	0.000740438	0.000441929	0.000716305	0.000547955	2.41342e-05	0.000594764	0.00086948	0.00059545	0.000562308	2.3989e-05	0.00262314	0.00120967	0.00101462	0.000418334	0.000746412
661	4.35501e-05	0.000462242	0.000923473	0.000722481	0.000443491	0.000705378	0.000493705	2.04632e-05	0.000578926	0.000863645	0.000579475	0.000549687	2.45923e-05	0.00259181	0.00120676	0.000984305	0.000426923	0.000717499
662	4.29849e-05	0.00045553	0.000828985	0.000704211	0.00044734	0.000693806	0.000457551	1.73223e-05	0.000563404	0.000857708	0.000563482	0.000537911	2.52596e-05	0.0025599	0.00120356	0.000957196	0.000439682	0.000689608
663	4.25825e-05	0.000449253	0.000743831	0.000685674	0.00045262	0.000681218	0.000434958	1.46381e-05	0.000548189	0.000851633	0.000547525	0.000526831	2.59862e-05	0.00252715	0.00120022	0.000933451	0.000455151	0.000662829
664	4.23219e-05	0.000443336	0.000671118	0.000666914	0.000458465	0.000667301	0.000422254	1.23482e-05	0.000533278	0.000845387	0.000531659	0.000516293	2.67679e-05	0.00249315	0.00119676	0.000913041	0.000471982	0.000637245
665	4.21844e-05	0.000437715	0.000612519	0.000647977	0.000464044	0.000651831	0.000416809	1.04001e-05	0.000518672	0.000838935	0.000515933	0.000506153	2.76008e-05	0.00245737	0.00119316	0.000895751	0.000489176	0.000612931
666	4.21536e-05	0.000432341	0.000568372	0.000628909	0.000468599	0.000634684	0.000417025	8.75037e-06	0.000504373	0.000832243	0.000500396	0.000496276	2.84811e-05	0.0024192	0.00118934	0.000881188	0.000506201	0.00058995
667	4.22154e-05	0.000427173	0.000537915	0.000609759	0.000471484	0.000615848	0.000422202	7.3656e-06	0.00049039	0.00082528	0.00048509	0.000486552	2.94056e-05	0.00237813	0.0011852	0.000868801	0.000522925	0.000568354
668	4.23575e-05	0.000422176	0.000519611	0.000590574	0.00047219	0.000595423	0.000432379	6.22367e-06	0.000476733	0.000818015	0.000470056	0.0004769	3.03711e-05	0.00233378	0.00118068	0.000857919	0.00053937	0.000548185
669	4.25698e-05	0.000417322	0.00051147	0.000571402	0.000470362	0.000573609	0.000448152	5.31815e-06	0.000463416	0.000810418	0.000455328	0.000467271	3.13748e-05	0.00228601	0.00117573	0.000847792	0.000555308	0.000529471
670	4.28436e-05	0.000412586	0.000511344	0.00055229	0.000465811	0.000550696	0.000470481	4.66606e-06	0.000450455	0.000802463	0.000440939	0.000457651	3.24138e-05	0.00223498	0.00117032	0.000837651	0.000569893	0.000512231
671	4.31717e-05	0.000407945	0.00051715	0.000533287	0.000458511	0.000527031	0.000500486	4.32108e-06	0.00043787	0.000794126	0.000426916	0.000448058	3.34857e-05	0.00218109	0.00116448	0.00082676	0.000581475	0.00049647
672	4.35482e-05	0.000403382	0.000527013	0.000514439	0.000448584	0.000503002	0.000539201	4.3944e-06	0.00042568	0.000785385	0.000413282	0.000438539	3.4588e-05	0.00212502	0.0011582	0.000814485	0.000587779	0.000482186
673	4.39682e-05	0.000398879	0.000539345	0.000495791	0.000436279	0.000479001	0.000587315	5.08542e-06	0.000413907	0.000776221	0.000400055	0.000429153	3.57184e-05	0.00206759	0.00115146	0.000800332	0.000586435	0.000469364
674	4.44278e-05	0.000394424	0.000552868	0.000477387	0.000421948	0.000455406	0.000644883	6.72412e-06	0.000402574	0.000766617	0.000387252	0.000419967	3.68748e-05	0.00200973	0.00114417	0.000783995	0.000575727	0.000457981
675	4.49238e-05	0.000390007	0.000566601	0.00045927	0.000406007	0.000432555	0.000711078	9.8247e-06	0.000391704	0.000756562	0.000374884	0.00041104	3.80549e-05	0.00195235	0.00113619	0.000765367	0.000555263	0.000448005
676	4.54536e-05	0.000385619	0.000579822	0.000441479	0.000388911	0.000410729	0.000783996	1.51471e-05	0.000381319	0.000746045	0.000362958	0.000402416	3.92568e-05	0.00189627	0.00112725	0.000744539	0.000526289	0.000439395
677	4.60151e-05	0.000381259	0.000592031	0.000424054	0.000371116	0.000390145	0.000860591	2.37575e-05	0.000371442	0.00073506	0.000351479	0.000394114	4.04784e-05	0.00184219	0.001117	0.000721781	0.000491503	0.000432099
678	4.66068e-05	0.000376928	0.000602909	0.000407029	0.000353052	0.000370952	0.000936761	3.70727e-05	0.000362094	0.000723605	0.000340451	0.00038613	4.17175e-05	0.00179066	0.00110504	0.0006975	0.000454422	0.000426058
679	4.72271e-05	0.000372631	0.00061228	0.000390437	0.000335108	0.000353229	0.00100761	5.68661e-05	0.000353296	0.000711683	0.000329871	0.000378441	4.29723e-05	0.00174204	0.0010909	0.000672195	0.000418545	0.000421198
680	4.7875e-05	0.00036838	0.000620085	0.000374309	0.000317609	0.000336994	0.00106791	8.521e-05	0.000345066	0.000699299	0.000319737	0.000371009	4.42407e-05	0.0016966	0.00107414	0.000646397	0.000386618	0.000417434
681	4.85496e-05	0.000364192	0.000626356	0.000358671	0.000300814	0.000322215	0.00111259	0.000124329	0.00033742	0.000686464	0.000310045	0.000363796	4.55207e-05	0.00165448	0.00105436	0.000620628	0.000360201	0.000414669
682	4.92501e-05	0.000360091	0.000631198	0.000343548	0.000284914	0.000308821	0.00113741	0.00017635	0.000330374	0.000673192	0.000300788	0.000356771	4.68103e-05	0.00161575	0.00103125	0.000595357	0.00033963	0.00041279
683	4.99757e-05	0.000356105	0.000634772	0.000328962	0.000270032	0.00029671	0.00113941	0.000242949	0.000323939	0.000659503	0.000291957	0.000349914	4.81074e-05	0.00158046	0.00100465	0.000570968	0.000324277	0.000411671
684	5.07259e-05	0.00035227	0.000637277	0.000314929	0.000256239	0.000285765	0.00111738	0.000324935	0.000318125	0.000645421	0.000283545	0.000343223	4.94099e-05	0.00154861	0.000974571	0.000547753	0.000312954	0.000411171
685	5.15001e-05	0.000348625	0.000638938	0.000301464	0.000243556	0.000275861	0.00107201	0.000421822	0.000312936	0.000630972	0.000275542	0.000336706	5.07158e-05	0.00152018	0.000941173	0.000525903	0.000304309	0.00041114
686	5.22977e-05	0.000345219	0.000639988	0.000288579	0.000231972	0.000266875	0.00100579	0.00053149	0.000308376	0.000616189	0.000267936	0.000330375	5.20231e-05	0.00149508	0.000904802	0.000505519	0.000297102	0.000411417
687	5.31182e-05	0.0003421	0.000640656	0.000276284	0.000221448	0.00025869	0.000922749	0.000650019	0.000304444	0.000601107	0.000260718	0.000324236	5.33295e-05	0.00147312	0.00086595	0.000486626	0.000290361	0.000411836
688	5.39611e-05	0.000339323	0.000641155	0.000264583	0.000211933	0.000251198	0.000827918	0.000771804	0.000301134	0.000585764	0.000253876	0.000318279	5.46329e-05	0.00145401	0.000825223	0.000469191	0.000283414	0.00041223
689	5.48258e-05	0.000336944	0.000641662	0.00025348	0.000203369	0.000244306	0.000726785	0.000889965	0.000298436	0.000570202	0.0002474	0.000312474	5.59314e-05	0.0014373	0.000783307	0.000453142	0.000275858	0.000412436
690	5.57119e-05	0.00033502	0.000642315	0.000242975	0.000195696	0.000237931	0.000624689	0.000997064	0.000296338	0.000554464	0.000241278	0.000306775	5.72227e-05	0.00142238	0.00074092	0.000438385	0.000267506	0.000412302
691	5.66188e-05	0.000333606	0.0006432	0.000233067	0.000188856	0.000232006	0.000526321	0.00108602	0.000294818	0.000538595	0.0002355	0.000301127	5.85048e-05	0.00140853	0.000698771	0.000424821	0.000258324	0.000411688
692	5.7546e-05	0.000332752	0.000644344	0.000223751	0.000182799	0.000226471	0.000435375	0.00115105	0.000293853	0.000522642	0.000230056	0.000295481	5.97757e-05	0.00139491	0.000657526	0.000412356	0.00024839	0.000410476
693	5.84928e-05	0.000332503	0.000645716	0.000215022	0.00017748	0.000221281	0.000354377	0.00118854	0.000293413	0.000506651	0.000224935	0.000289807	6.10332e-05	0.0013807	0.000617773	0.00040091	0.00023785	0.00040857
694	5.94588e-05	0.000332896	0.000647224	0.000206873	0.00017286	0.000216395	0.000284673	0.00119755	0.000293463	0.000490668	0.000220129	0.000284108	6.22754e-05	0.00136517	0.000580005	0.000390418	0.000226897	0.0004059
695	6.04434e-05	0.000333957	0.000648717	0.000199292	0.000168907	0.000211782	0.00022657	0.00117992	0.000293962	0.00047474	0.000215627	0.000278425	6.35003e-05	0.00134773	0.000544608	0.000380835	0.000215746	0.000402426
696	6.1446e-05	0.000335697	0.000649996	0.000192271	0.000165594	0.000207415	0.000179551	0.00113996	0.000294862	0.000458912	0.000211421	0.000272833	6.47062e-05	0.00132808	0.000511857	0.000372126	0.000204618	0.000398134
697	6.24659e-05	0.000338113	0.000650821	0.000185798	0.0001629	0.000203271	0.000142542	0.00108376	0.000296114	0.000443227	0.000207503	0.000267432	6.5891e-05	0.00130621	0.000481919	0.000364262	0.000193724	0.000393041
698	6.35027e-05	0.000341186	0.000650922	0.000179859	0.000160805	0.000199331	0.000114158	0.00101826	0.000297659	0.000427725	0.000203865	0.000262333	6.70532e-05	0.0012824	0.000454871	0.000357209	0.000183256	0.000387189
699	6.45557e-05	0.000344875	0.000650013	0.000174441	0.000159295	0.000195577	9.29194e-05	0.000950234	0.000299437	0.000412446	0.000200499	0.000257636	6.81911e-05	0.00125723	0.000430707	0.000350914	0.000173372	0.000380643
700	6.56243e-05	0.000349124	0.00064781	0.000169532	0.000158358	0.000191994	7.74104e-05	0.000885508	0.000301383	0.000397426	0.0001974	0.000253419	6.93031e-05	0.00123144	0.000409356	0.000345295	0.000164195	0.000373489
701	6.6708e-05	0.000353855	0.000644037	0.000165115	0.000157985	0.000188567	6.63763e-05	0.000828318	0.000303431	0.000382699	0.000194559	0.000249724	7.0388e-05	0.00120584	0.000390704	0.000340234	0.000155811	0.00036583
702	6.78061e-05	0.000358974	0.000638449	0.000161177	0.000158167	0.000185283	5.87729e-05	0.000781062	0.000305512	0.000368293	0.000191972	0.000246553	7.14443e-05	0.00118123	0.000374604	0.00033557	0.000148264	0.000357777
703	6.8918e-05	0.00036437	0.00063084	0.000157704	0.000158901	0.00018213	5.37741e-05	0.000744349	0.000307556	0.000354237	0.000189631	0.000243872	7.24709e-05	0.00115821	0.000360895	0.000331111	0.000141565	0.000349451
704	7.00433e-05	0.000369917	0.000621054	0.00015468	0.000160182	0.000179094	5.07543e-05	0.000717282	0.000309497	0.000340553	0.000187532	0.000241615	7.34669e-05	0.00113717	0.00034941	0.000326642	0.000135695	0.000340974
705	7.11813e-05	0.00037548	0.000608994	0.000152093	0.000162008	0.000176165	4.92574e-05	0.000697896	0.000311269	0.000327264	0.000185668	0.000239696	7.44315e-05	0.00111821	0.000339993	0.000321947	0.000130609	0.000332465
706	7.23316e-05	0.000380916	0.000594627	0.000149926	0.000164378	0.000173331	4.89604e-05	0.000683648	0.000312811	0.000314385	0.000184035	0.00023802	7.53639e-05	0.00110112	0.000332496	0.000316844	0.000126247	0.000324037
707	7.34936e-05	0.00038608	0.000577987	0.000148167	0.000167292	0.00017058	4.96403e-05	0.000671856	0.000314067	0.000301932	0.000182628	0.000236491	7.62636e-05	0.00108544	0.000326795	0.000311211	0.000122536	0.000315793
708	7.46668e-05	0.000390829	0.000559172	0.000146803	0.000170748	0.000167901	5.11446e-05	0.000660055	0.000314987	0.000289917	0.00018144	0.000235027	7.71305e-05	0.0010705	0.000322783	0.000305017	0.000119402	0.000307827
709	7.58508e-05	0.000395028	0.000538344	0.00014582	0.000174744	0.000165284	5.33691e-05	0.000646228	0.000315533	0.000278347	0.000180467	0.000233556	7.79643e-05	0.00105554	0.000320379	0.000298351	0.000116768	0.000300215
710	7.70451e-05	0.000398551	0.000515719	0.000145207	0.000179276	0.000162718	5.62412e-05	0.00062893	0.000315672	0.000267231	0.000179703	0.000232027	7.87651e-05	0.00103975	0.000319521	0.000291434	0.000114564	0.000293022
711	7.82493e-05	0.000401292	0.000491559	0.000144951	0.000184336	0.000160194	5.97084e-05	0.000607313	0.000315384	0.00025657	0.000179145	0.000230406	7.95333e-05	0.00102243	0.000320169	0.000284617	0.000112726	0.000286297
712	7.9463e-05	0.00040316	0.000466163	0.000145041	0.000189914	0.000157703	6.37303e-05	0.000581085	0.000314659	0.000246369	0.000178785	0.000228678	8.02693e-05	0.00100301	0.000322296	0.000278367	0.000111201	0.000280078
713	8.06859e-05	0.000404089	0.000439857	0.000145467	0.000195992	0.000155235	6.82739e-05	0.000550419	0.000313499	0.000236626	0.000178619	0.000226841	8.09738e-05	0.000981118	0.000325891	0.000273237	0.000109943	0.000274388
714	8.19177e-05	0.000404039	0.000412977	0.000146219	0.000202548	0.000152783	7.331e-05	0.000515856	0.000311917	0.00022734	0.000178641	0.000224907	8.16478e-05	0.000956636	0.000330947	0.000269818	0.000108918	0.000269242
715	8.31582e-05	0.000402992	0.000385865	0.000147286	0.000209553	0.00015034	7.88118e-05	0.000478189	0.000309939	0.000218508	0.000178845	0.000222899	8.22923e-05	0.00092968	0.00033746	0.000268687	0.000108098	0.000264646
716	8.4407e-05	0.000400959	0.00035885	0.000148661	0.000216968	0.000147901	8.4753e-05	0.000438364	0.0003076	0.000210125	0.000179226	0.000220845	8.29087e-05	0.000900589	0.000345422	0.00027035	0.000107463	0.000260602
717	8.5664e-05	0.000397975	0.000332244	0.000150335	0.000224749	0.000145462	9.11071e-05	0.000397389	0.000304945	0.000202186	0.000179777	0.000218778	8.34986e-05	0.00086989	0.000354811	0.000275189	0.000107002	0.000257105
718	8.69291e-05	0.000394095	0.00030633	0.000152299	0.000232839	0.00014302	9.78472e-05	0.000356257	0.00030203	0.000194684	0.000180491	0.000216732	8.40637e-05	0.00083824	0.000365591	0.000283411	0.000106703	0.000254148
719	8.82022e-05	0.000389398	0.000281361	0.000154548	0.000241176	0.000140574	0.000104945	0.000315891	0.000298918	0.000187611	0.000181362	0.000214743	8.46058e-05	0.000806373	0.000377701	0.000295016	0.000106562	0.000251725
720	8.94831e-05	0.000383976	0.000257546	0.000157073	0.000249688	0.000138124	0.000112371	0.000277097	0.000295678	0.00018096	0.000182383	0.000212844	8.51273e-05	0.000775038	0.00039105	0.000309781	0.000106574	0.000249826
721	9.07719e-05	0.000377935	0.000235059	0.000159868	0.000258294	0.000135675	0.000120092	0.000240541	0.000292382	0.000174722	0.000183547	0.000211065	8.56303e-05	0.000744942	0.000405516	0.000327261	0.000106734	0.000248442
722	9.20687e-05	0.00037139	0.000214028	0.000162928	0.000266905	0.00013323	0.000128076	0.000206727	0.000289108	0.000168887	0.000184846	0.000209431	8.61174e-05	0.000716715	0.000420938	0.000346809	0.000107037	0.000247562
723	9.33734e-05	0.00036446	0.000194544	0.000166247	0.00027543	0.000130797	0.000136287	0.000176006	0.000285932	0.000163447	0.000186273	0.000207964	8.65912e-05	0.000690869	0.000437119	0.000367618	0.000107477	0.000247174
724	9.46862e-05	0.000357262	0.000176656	0.000169819	0.000283768	0.000128386	0.000144684	0.000148572	0.000282931	0.000158391	0.000187818	0.000206679	8.70545e-05	0.000667788	0.000453823	0.000388773	0.000108046	0.000247263
725	9.60072e-05	0.000349912	0.000160381	0.00017364	0.000291818	0.000126008	0.000153229	0.000124486	0.000280178	0.00015371	0.000189475	0.000205589	8.75103e-05	0.000647723	0.000470777	0.000409317	0.000108733	0.000247813
726	9.73367e-05	0.000342518	0.000145709	0.000177703	0.000299478	0.000123679	0.000161877	0.000103689	0.000277743	0.000149394	0.000191234	0.000204699	8.79617e-05	0.000630793	0.00048768	0.00042832	0.000109525	0.000248801
727	9.86748e-05	0.000335178	0.000132601	0.000182005	0.000306646	0.000121414	0.000170583	8.60311e-05	0.000275687	0.000145433	0.000193087	0.000204012	8.84116e-05	0.000617007	0.000504203	0.000444945	0.000110405	0.000250203
728	0.000100022	0.00032798	0.000121003	0.000186541	0.000313223	0.000119233	0.000179299	7.12915e-05	0.000274068	0.000141817	0.000195024	0.000203525	8.88636e-05	0.000606277	0.000520004	0.000458506	0.000111356	0.000251989
729	0.000101378	0.000320999	0.000110848	0.000191304	0.000319117	0.000117156	0.000187976	5.92026e-05	0.00027293	0.000138537	0.000197037	0.000203234	8.93207e-05	0.000598442	0.000534733	0.000468517	0.000112358	0.000254124
730	0.000102744	0.000314295	0.000102062	0.000196291	0.000324242	0.000115208	0.000196563	4.94707e-05	0.000272313	0.000135582	0.000199115	0.00020313	8.97865e-05	0.000593288	0.000548045	0.00047471	0.00011339	0.000256568
731	0.000104119	0.000307915	9.45701e-05	0.000201494	0.000328522	0.000113413	0.000205007	4.17944e-05	0.000272242	0.000132944	0.000201249	0.000203204	9.02642e-05	0.000590563	0.000559614	0.000477051	0.000114428	0.000259278
732	0.000105505	0.000301895	8.83003e-05	0.000206909	0.000331893	0.000111797	0.000213255	3.58782e-05	0.000272733	0.000130612	0.00020343	0.000203445	9.07572e-05	0.000589998	0.000569141	0.000475722	0.000115451	0.000262208
733	0.000106901	0.000296255	8.31893e-05	0.000212529	0.000334302	0.00011039	0.000221254	3.1444e-05	0.000273791	0.000128579	0.000205648	0.000203842	9.1269e-05	0.000591312	0.000576371	0.000471094	0.000116435	0.000265308
734	0.000108309	0.000291008	7.91851e-05	0.000218346	0.000335711	0.000109221	0.000228951	2.82376e-05	0.000275409	0.000126835	0.000207892	0.000204381	9.18028e-05	0.000594225	0.000581096	0.000463681	0.000117358	0.000268527
735	0.000109727	0.000286154	7.62503e-05	0.000224353	0.000336098	0.000108321	0.000236293	2.60339e-05	0.00027757	0.000125371	0.000210154	0.000205051	9.23619e-05	0.000598464	0.000583167	0.000454094	0.000118201	0.000271813
736	0.000111158	0.000281686	7.43639e-05	0.00023054	0.000335454	0.000107721	0.000243229	2.46379e-05	0.000280246	0.00012418	0.000212422	0.000205842	9.29494e-05	0.000603761	0.000582503	0.000442982	0.000118946	0.000275117
737	0.000112601	0.000277591	7.35224e-05	0.000236899	0.000333785	0.000107453	0.000249709	2.38848e-05	0.0002834	0.000123253	0.000214686	0.000206742	9.35684e-05	0.000609861	0.000579085	0.000430985	0.000119577	0.00027839
738	0.000114056	0.00027385	7.37408e-05	0.000243417	0.000331114	0.00010755	0.000255687	2.36382e-05	0.000286984	0.000122582	0.000216938	0.000207742	9.42218e-05	0.000616522	0.000572966	0.000418689	0.000120083	0.000281586
739	0.000115524	0.000270443	7.50514e-05	0.000250083	0.000327475	0.000108043	0.000261118	2.37874e-05	0.000290944	0.000122159	0.000219167	0.000208834	9.49123e-05	0.000623516	0.00056426	0.000406587	0.000120454	0.000284662
740	0.000117006	0.000267343	7.75024e-05	0.000256883	0.000322915	0.000108965	0.000265961	2.42445e-05	0.00029522	0.000121977	0.000221363	0.00021001	9.56424e-05	0.000630627	0.000553144	0.000395062	0.000120687	0.000287584
741	0.000118501	0.000264527	8.11562e-05	0.000263804	0.000317494	0.000110348	0.00027018	2.49407e-05	0.000299745	0.000122029	0.000223518	0.000211264	9.64146e-05	0.000637655	0.000539841	0.000384371	0.000120781	0.000290318
742	0.00012001	0.000261968	8.60857e-05	0.000270829	0.00031128	0.000112222	0.000273742	2.58231e-05	0.000304448	0.000122305	0.000225621	0.000212593	9.72309e-05	0.000644418	0.00052462	0.000374646	0.000120739	0.000292841
743	0.000121533	0.000259642	9.23703e-05	0.00027794	0.000304348	0.000114617	0.00027662	2.6852e-05	0.000309258	0.0001228	0.000227664	0.00021399	9.80932e-05	0.00065075	0.000507779	0.000365904	0.000120568	0.000295133
744	0.000123071	0.000257525	0.000100092	0.00028512	0.00029678	0.000117562	0.000278791	2.79978e-05	0.0003141	0.000123505	0.000229638	0.000215454	9.9003e-05	0.000656503	0.000489633	0.000358069	0.000120278	0.000297183
745	0.000124623	0.000255597	0.000109327	0.000292349	0.00028866	0.000121084	0.000280238	2.9239e-05	0.000318901	0.000124412	0.000231536	0.000216982	9.99618e-05	0.00066155	0.000470506	0.00035099	0.000119884	0.000298985
746	0.00012619	0.000253836	0.000120145	0.000299604	0.000280077	0.000125209	0.00028095	3.05599e-05	0.00032359	0.000125511	0.000233348	0.00021857	0.00010097	0.000665786	0.000450718	0.000344476	0.000119401	0.000300541
747	0.000127772	0.000252226	0.000132596	0.000306865	0.000271118	0.000129958	0.00028092	3.19497e-05	0.000328097	0.000126795	0.000235067	0.000220218	0.00010203	0.000669128	0.000430577	0.000338321	0.000118849	0.000301858
748	0.000129368	0.000250752	0.00014671	0.000314108	0.000261868	0.000135351	0.00028015	3.34006e-05	0.000332358	0.000128251	0.000236686	0.000221922	0.00010314	0.000671517	0.000410365	0.000332336	0.000118248	0.000302949
749	0.000130979	0.000249401	0.000162486	0.000321308	0.000252409	0.000141404	0.000278645	3.49073e-05	0.000336313	0.000129871	0.000238199	0.000223679	0.000104301	0.00067292	0.00039034	0.000326371	0.000117618	0.000303832
750	0.000132604	0.000248163	0.000179887	0.000328441	0.000242822	0.000148129	0.000276417	3.64661e-05	0.000339908	0.000131642	0.0002396	0.000225487	0.000105513	0.000673327	0.000370727	0.000320331	0.000116982	0.000304529
751	0.000134243	0.000247031	0.000198836	0.000335482	0.000233179	0.000155531	0.000273483	3.80743e-05	0.000343096	0.000133551	0.000240882	0.000227339	0.000106776	0.000672759	0.000351713	0.000314194	0.00011636	0.000305064
752	0.000135896	0.000245999	0.000219211	0.000342404	0.000223549	0.000163609	0.000269867	3.97302e-05	0.000345836	0.000135583	0.000242041	0.000229229	0.000108087	0.000671259	0.000333453	0.000308007	0.000115774	0.000305466
753	0.000137562	0.000245065	0.000240838	0.000349183	0.000213993	0.000172354	0.000265597	4.14323e-05	0.000348096	0.000137725	0.000243073	0.000231151	0.000109446	0.000668896	0.000316065	0.000301884	0.000115241	0.000305763
754	0.00013924	0.000244226	0.000263496	0.000355792	0.000204567	0.00018175	0.000260705	4.31795e-05	0.00034985	0.000139957	0.000243973	0.000233094	0.000110851	0.000665765	0.000299636	0.000295995	0.000114779	0.000305985
755	0.000140931	0.000243483	0.000286915	0.000362208	0.000195318	0.000191768	0.000255228	4.49709e-05	0.00035108	0.000142263	0.000244738	0.000235047	0.000112301	0.000661981	0.000284223	0.000290553	0.000114402	0.000306159
756	0.000142632	0.000242839	0.000310776	0.000368405	0.000186288	0.000202368	0.000249208	4.68056e-05	0.000351774	0.000144623	0.000245366	0.000236997	0.000113792	0.000657676	0.00026986	0.000285793	0.000114123	0.000306312
757	0.000144344	0.000242299	0.000334722	0.000374362	0.000177513	0.000213499	0.000242687	4.86825e-05	0.000351929	0.000147016	0.000245855	0.000238928	0.000115323	0.000652996	0.000256558	0.000281956	0.000113949	0.00030647
758	0.000146066	0.000241867	0.000358357	0.000380056	0.000169021	0.000225093	0.000235715	5.06006e-05	0.000351547	0.000149418	0.000246203	0.000240823	0.00011689	0.000648095	0.000244314	0.000279273	0.000113887	0.000306653
759	0.000147795	0.000241552	0.000381266	0.000385469	0.000160837	0.000237071	0.000228339	5.2559e-05	0.000350639	0.000151808	0.000246409	0.000242663	0.00011849	0.000643125	0.000233112	0.000277955	0.000113941	0.000306879
760	0.000149531	0.000241362	0.000403015	0.000390581	0.000152979	0.000249336	0.000220611	5.45565e-05	0.000349217	0.000154159	0.000246475	0.000244428	0.000120121	0.000638235	0.000222928	0.000278188	0.000114113	0.000307163
761	0.000151273	0.000241308	0.000423173	0.000395379	0.000145459	0.000261779	0.000212583	5.65916e-05	0.000347303	0.000156448	0.000246399	0.000246095	0.000121777	0.000633558	0.000213733	0.000280125	0.000114401	0.000307514
762	0.000153019	0.000241403	0.000441317	0.000399847	0.000138288	0.000274275	0.000204307	5.86632e-05	0.000344922	0.000158647	0.000246184	0.000247643	0.000123456	0.000629202	0.000205495	0.000283889	0.000114807	0.000307936
763	0.000154767	0.000241661	0.000457055	0.000403977	0.00013147	0.000286687	0.000195835	6.07695e-05	0.000342101	0.000160731	0.000245831	0.000249049	0.000125153	0.000625249	0.000198181	0.000289572	0.000115333	0.00030843
764	0.000156517	0.000242098	0.00047003	0.00040776	0.000125007	0.000298866	0.000187221	6.2909e-05	0.000338875	0.000162673	0.000245343	0.000250291	0.000126864	0.000621744	0.000191761	0.00029724	0.000115986	0.000308992
765	0.000158265	0.000242735	0.000479939	0.000411191	0.000118897	0.000310656	0.000178514	6.508e-05	0.000335278	0.000164447	0.000244723	0.000251348	0.000128586	0.000618693	0.000186204	0.000306926	0.00011678	0.000309613
766	0.000160011	0.000243592	0.000486544	0.000414267	0.000113139	0.000321893	0.000169763	6.72804e-05	0.00033135	0.00016603	0.000243973	0.000252202	0.000130313	0.000616057	0.000181483	0.000318632	0.000117743	0.000310282
767	0.000161752	0.000244693	0.000489676	0.000416991	0.000107725	0.000332415	0.000161017	6.95083e-05	0.000327131	0.000167396	0.000243098	0.000252834	0.000132042	0.000613762	0.000177569	0.000332322	0.000118916	0.000310983
768	0.000163486	0.000246066	0.000489246	0.000419365	0.000102648	0.000342059	0.000152319	7.17616e-05	0.000322663	0.000168523	0.000242104	0.000253233	0.000133767	0.000611691	0.000174438	0.000347912	0.000120363	0.000311698
769	0.000165212	0.000247739	0.000485245	0.000421395	9.78991e-05	0.000350671	0.000143712	7.4038e-05	0.000317992	0.000169392	0.000240993	0.000253387	0.000135486	0.000609703	0.000172065	0.000365262	0.000122172	0.000312408
770	0.000166926	0.000249745	0.00047775	0.000423092	9.34674e-05	0.000358108	0.000135234	7.6335e-05	0.00031316	0.000169985	0.000239773	0.000253292	0.000137193	0.000607631	0.000170424	0.000384171	0.000124456	0.000313091
771	0.000168627	0.000252119	0.000466911	0.000424466	8.93418e-05	0.000364241	0.000126922	7.86503e-05	0.000308214	0.000170285	0.000238448	0.000252946	0.000138885	0.000605303	0.000169489	0.000404368	0.000127353	0.000313725
772	0.000170313	0.000254894	0.000452958	0.000425531	8.551e-05	0.000368963	0.000118808	8.09811e-05	0.000303197	0.000170281	0.000237025	0.000252351	0.000140557	0.000602547	0.000169234	0.000425511	0.000131018	0.000314287
773	0.000171982	0.000258106	0.00043618	0.000426303	8.1959e-05	0.00037219	0.000110921	8.33248e-05	0.000298155	0.000169965	0.00023551	0.000251518	0.000142205	0.000599207	0.000169629	0.000447197	0.000135615	0.000314756
774	0.00017363	0.000261788	0.000416924	0.000426799	7.86759e-05	0.000373865	0.000103285	8.56784e-05	0.000293129	0.00016933	0.00023391	0.000250458	0.000143827	0.000595154	0.000170643	0.000468969	0.000141296	0.000315112
775	0.000175256	0.000265969	0.000395577	0.000427039	7.56469e-05	0.000373961	9.59223e-05	8.80391e-05	0.000288163	0.000168376	0.000232232	0.000249188	0.000145419	0.000590293	0.000172241	0.000490334	0.000148176	0.000315334
776	0.000176857	0.000270673	0.000372557	0.000427042	7.28587e-05	0.00037248	8.88512e-05	9.04039e-05	0.000283294	0.000167103	0.000230482	0.000247729	0.000146978	0.000584574	0.000174388	0.000510786	0.000156308	0.000315407
777	0.000178431	0.000275913	0.000348293	0.000426829	7.02977e-05	0.000369455	8.20858e-05	9.27696e-05	0.00027856	0.000165518	0.000228669	0.000246105	0.0001485	0.000577989	0.000177044	0.000529832	0.000165654	0.000315315
778	0.000179976	0.000281692	0.000323219	0.000426421	6.79506e-05	0.000364951	7.56372e-05	9.51329e-05	0.000273996	0.00016363	0.000226799	0.000244342	0.000149985	0.000570576	0.000180169	0.000547018	0.000176059	0.000315049
779	0.000181489	0.000287998	0.000297755	0.000425839	6.58044e-05	0.000359059	6.95131e-05	9.74907e-05	0.00026963	0.000161453	0.00022488	0.000242466	0.000151428	0.000562413	0.00018372	0.000561949	0.000187235	0.000314598
780	0.000182969	0.0002948	0.000272297	0.000425105	6.38463e-05	0.000351897	6.37182e-05	9.98396e-05	0.00026549	0.000159003	0.000222919	0.000240505	0.00015283	0.000553613	0.000187656	0.000574314	0.000198764	0.000313958
781	0.000184414	0.000302047	0.000247212	0.000424238	6.20642e-05	0.000343605	5.82544e-05	0.000102176	0.000261599	0.0001563	0.000220923	0.000238485	0.000154189	0.000544311	0.000191933	0.000583897	0.000210105	0.000313125
782	0.00018582	0.000309668	0.000222821	0.000423259	6.04463e-05	0.000334339	5.31206e-05	0.000104497	0.000257975	0.000153365	0.0002189	0.00023643	0.000155504	0.000534657	0.000196509	0.000590582	0.000220639	0.000312103
783	0.000187187	0.000317566	0.000199403	0.000422185	5.89816e-05	0.000324269	4.83137e-05	0.000106798	0.000254633	0.000150225	0.000216857	0.000234361	0.000156774	0.000524805	0.000201344	0.000594352	0.000229712	0.000310893
784	0.000188513	0.000325624	0.000177186	0.000421034	5.76595e-05	0.000313575	4.38282e-05	0.000109076	0.000251581	0.000146905	0.000214801	0.000232297	0.000158	0.000514899	0.0002064	0.000595286	0.000236706	0.000309504
785	0.000189795	0.0003337	0.000156346	0.000419821	5.64701e-05	0.000302437	3.96568e-05	0.000111328	0.000248824	0.000143436	0.000212739	0.000230252	0.000159181	0.000505072	0.000211644	0.000593541	0.000241097	0.000307943
786	0.000191034	0.000341636	0.000137012	0.000418561	5.54043e-05	0.000291034	3.57902e-05	0.00011355	0.000246364	0.000139845	0.000210677	0.000228234	0.00016032	0.000495432	0.000217046	0.000589342	0.000242521	0.000306224
787	0.000192226	0.000349256	0.000119261	0.000417266	5.44534e-05	0.000279538	3.22182e-05	0.000115738	0.000244196	0.000136164	0.000208623	0.000226249	0.000161417	0.000486062	0.000222582	0.00058296	0.000240814	0.000304361
788	0.000193371	0.000356378	0.000103129	0.000415945	5.36096e-05	0.000268112	2.8929e-05	0.000117888	0.000242313	0.000132423	0.000206582	0.000224298	0.000162473	0.00047702	0.000228234	0.000574699	0.000236035	0.000302367
789	0.000194468	0.000362812	8.86139e-05	0.000414608	5.28657e-05	0.000256902	2.591e-05	0.000119998	0.000240703	0.000128653	0.000204561	0.000222378	0.000163492	0.000468335	0.000233993	0.000564882	0.000228461	0.000300262
790	0.000195516	0.000368376	7.56772e-05	0.000413261	5.22149e-05	0.000246039	2.3148e-05	0.000122062	0.000239353	0.000124882	0.000202565	0.000220484	0.000164476	0.000460018	0.000239854	0.000553832	0.000218554	0.000298062
791	0.000196515	0.000372898	6.4255e-05	0.000411908	5.16512e-05	0.000235635	2.06292e-05	0.000124079	0.000238243	0.00012114	0.000200599	0.000218607	0.000165428	0.000452057	0.000245822	0.00054187	0.000206911	0.000295786
792	0.000197464	0.000376224	5.42613e-05	0.000410552	5.11692e-05	0.000225782	1.83393e-05	0.000126044	0.000237355	0.000117453	0.000198668	0.000216738	0.000166351	0.000444429	0.000251911	0.000529299	0.0001942	0.000293454
793	0.000198362	0.000378227	4.55949e-05	0.000409196	5.07637e-05	0.000216551	1.62642e-05	0.000127953	0.000236666	0.000113847	0.000196779	0.000214868	0.000167249	0.000437106	0.000258141	0.000516403	0.000181093	0.000291085
794	0.000199211	0.000378812	3.8144e-05	0.000407837	5.04305e-05	0.000207995	1.43896e-05	0.000129804	0.000236152	0.000110344	0.000194933	0.000212987	0.000168126	0.000430056	0.000264541	0.000503437	0.000168209	0.000288698
795	0.000200009	0.00037792	3.17918e-05	0.000406475	5.01653e-05	0.000200145	1.27013e-05	0.000131593	0.000235789	0.000106966	0.000193137	0.000211088	0.000168986	0.000423253	0.000271149	0.000490628	0.000156064	0.000286312
796	0.000200758	0.000375534	2.642e-05	0.000405107	4.99646e-05	0.000193018	1.11856e-05	0.000133317	0.000235551	0.00010373	0.000191393	0.000209166	0.000169835	0.000416675	0.00027801	0.000478166	0.000145046	0.000283945
797	0.000201457	0.000371676	2.19128e-05	0.000403729	4.98251e-05	0.000186612	9.829e-06	0.000134972	0.000235412	0.000100653	0.000189706	0.000207217	0.000170676	0.000410315	0.000285175	0.000466205	0.000135409	0.000281615
798	0.000202109	0.000366409	1.81595e-05	0.000402336	4.97437e-05	0.000180914	8.61854e-06	0.000136556	0.000235348	9.77467e-05	0.000188077	0.000205242	0.000171516	0.000404175	0.0002927	0.000454856	0.000127273	0.000279339
799	0.000202714	0.000359832	1.50561e-05	0.000400922	4.97179e-05	0.000175898	7.54178e-06	0.000138064	0.000235333	9.50229e-05	0.00018651	0.000203244	0.00017236	0.000398274	0.000300647	0.000444191	0.000120652	0.000277133
800	0.000203273	0.000352079	1.25074e-05	0.000399482	4.97451e-05	0.00017153	6.58688e-06	0.000139496	0.000235343	9.24889e-05	0.000185007	0.000201229	0.000173213	0.00039264	0.000309078	0.000434242	0.000115473	0.000275012
801	0.000203787	0.000343308	1.04272e-05	0.000398009	4.98232e-05	0.000167769	5.74263e-06	0.000140847	0.000235355	9.01505e-05	0.00018357	0.000199204	0.000174081	0.000387314	0.000318059	0.000425002	0.000111613	0.000272991
802	0.00020426	0.000333697	8.73892e-06	0.000396498	4.99501e-05	0.000164569	4.99849e-06	0.000142115	0.000235348	8.80106e-05	0.000182201	0.000197181	0.000174969	0.000382348	0.000327653	0.00041643	0.000108919	0.000271085
803	0.000204691	0.000323438	7.37545e-06	0.000394941	5.01241e-05	0.000161881	4.34458e-06	0.000143298	0.000235301	8.60703e-05	0.000180902	0.00019517	0.000175884	0.000377796	0.00033792	0.000408461	0.000107233	0.000269305
804	0.000205084	0.000312726	6.27881e-06	0.000393333	5.03433e-05	0.000159656	3.77172e-06	0.000144394	0.000235196	8.43286e-05	0.000179672	0.000193183	0.000176832	0.000373718	0.000348915	0.000401007	0.000106408	0.000267664
805	0.000205441	0.000301751	5.39952e-06	0.000391669	5.06064e-05	0.000157845	3.2714e-06	0.0001454	0.000235017	8.27825e-05	0.000178514	0.000191233	0.000177818	0.000370172	0.000360684	0.000393973	0.000106315	0.000266174
806	0.000205764	0.000290695	4.69592e-06	0.000389943	5.09117e-05	0.000156399	2.83577e-06	0.000146314	0.000234749	8.14278e-05	0.000177428	0.000189331	0.000178849	0.000367212	0.000373265	0.000387259	0.000106849	0.000264846
807	0.000206056	0.000279726	4.13331e-06	0.000388151	5.1258e-05	0.000155274	2.45765e-06	0.000147134	0.000234378	8.02587e-05	0.000176414	0.000187488	0.000179931	0.00036488	0.00038668	0.000380773	0.000107933	0.00026369
808	0.000206319	0.000268989	3.68315e-06	0.000386289	5.16439e-05	0.000154428	2.13046e-06	0.00014786	0.000233895	7.92684e-05	0.000175472	0.000185712	0.000181069	0.000363208	0.000400938	0.000374438	0.000109506	0.000262718
809	0.000206557	0.00025861	3.32218e-06	0.000384355	5.20682e-05	0.000153823	1.84824e-06	0.00014849	0.00023329	7.8449e-05	0.000174602	0.00018401	0.00018227	0.000362212	0.000416031	0.000368194	0.000111531	0.000261937
810	0.000206772	0.000248687	3.03167e-06	0.000382346	5.25299e-05	0.000153423	1.60559e-06	0.000149024	0.000232556	7.7792e-05	0.000173805	0.000182387	0.000183541	0.000361886	0.000431931	0.000362003	0.00011398	0.000261358
811	0.000206968	0.000239298	2.79669e-06	0.000380261	5.30277e-05	0.000153199	1.39764e-06	0.000149467	0.000231687	7.72887e-05	0.000173078	0.000180847	0.000184887	0.000362207	0.000448589	0.00035585	0.000116837	0.000260988
812	0.000207148	0.000230494	2.60545e-06	0.0003781	5.35608e-05	0.000153124	1.22001e-06	0.000149831	0.00023068	7.69296e-05	0.000172422	0.000179391	0.000186315	0.000363129	0.000465937	0.000349742	0.000120093	0.000260836
813	0.000207314	0.000222307	2.44871e-06	0.000375863	5.4128e-05	0.000153174	1.06881e-06	0.000150146	0.000229533	7.67054e-05	0.000171836	0.00017802	0.000187831	0.000364582	0.000483884	0.000343701	0.000123741	0.000260908
814	0.00020747	0.000214749	2.31932e-06	0.000373552	5.47286e-05	0.000153331	9.40567e-07	0.000150489	0.000228245	7.66067e-05	0.000171318	0.000176733	0.000189442	0.000366479	0.000502319	0.000337763	0.000127774	0.000261211
815	0.00020762	0.000207817	2.21177e-06	0.00037117	5.53615e-05	0.000153577	8.32187e-07	0.000151025	0.000226817	7.66241e-05	0.000170869	0.000175531	0.000191156	0.000368715	0.00052111	0.000331973	0.000132186	0.000261748
816	0.000207767	0.000201493	2.12185e-06	0.000368719	5.6026e-05	0.0001539	7.40955e-07	0.000152095	0.000225252	7.67487e-05	0.000170486	0.000174418	0.000192979	0.000371171	0.000540108	0.000326373	0.000136968	0.000262525
817	0.000207914	0.000195752	2.04638e-06	0.000366204	5.67212e-05	0.000154289	6.64476e-07	0.000154359	0.000223553	7.69718e-05	0.000170168	0.000173406	0.000194921	0.000373717	0.000559146	0.000321005	0.000142109	0.000263544
818	0.000208065	0.000190561	1.98295e-06	0.000363629	5.74464e-05	0.000154735	6.0065e-07	0.000159001	0.000221725	7.72851e-05	0.000169915	0.000172518	0.000196989	0.000376222	0.000578049	0.000315898	0.000147593	0.000264805
819	0.000208223	0.000185882	1.92975e-06	0.000360999	5.82008e-05	0.000155231	5.47646e-07	0.000167989	0.000219773	7.76807e-05	0.000169725	0.000171795	0.000199193	0.000378557	0.000596627	0.000311073	0.000153403	0.000266309
820	0.00020839	0.000181676	1.88543e-06	0.00035832	5.89837e-05	0.000155772	5.03867e-07	0.000184348	0.000217705	7.81513e-05	0.000169595	0.000171305	0.000201545	0.0003806	0.000614691	0.000306536	0.000159516	0.000268052
821	0.000208572	0.000177904	1.84898e-06	0.000355599	5.97946e-05	0.000156355	4.67931e-07	0.000212306	0.000215529	7.86901e-05	0.000169526	0.000171142	0.000204057	0.000382242	0.000632048	0.000302277	0.000165904	0.000270031
822	0.000208769	0.000174527	1.81963e-06	0.000352842	6.06327e-05	0.000156976	4.38644e-07	0.000257177	0.000213252	7.92908e-05	0.000169516	0.00017143	0.000206741	0.000383392	0.00064851	0.000298279	0.000172539	0.00027224
823	0.000208986	0.000171511	1.79684e-06	0.000350056	6.14976e-05	0.000157634	4.14978e-07	0.000324753	0.000210883	7.99477e-05	0.000169562	0.000172299	0.000209612	0.000383983	0.000663897	0.000294511	0.000179386	0.000274672
824	0.000209226	0.000168822	1.78015e-06	0.000347248	6.23886e-05	0.000158329	3.96052e-07	0.000420104	0.000208433	8.06556e-05	0.000169665	0.000173869	0.000212689	0.000383968	0.000678044	0.000290939	0.000186407	0.000277317
825	0.000209491	0.00016643	1.76924e-06	0.000344425	6.33052e-05	0.000159058	3.81112e-07	0.000545829	0.000205911	8.14097e-05	0.000169821	0.000176198	0.000215991	0.000383328	0.000690801	0.00028753	0.000193561	0.000280165
826	0.000209785	0.000164308	1.76386e-06	0.000341596	6.42471e-05	0.000159823	3.69518e-07	0.000700093	0.000203329	8.22059e-05	0.000170031	0.000179241	0.000219537	0.000382065	0.000702038	0.000284254	0.000200807	0.000283205
827	0.000210109	0.000162433	1.76381e-06	0.000338766	6.52136e-05	0.000160624	3.60725e-07	0.000875075	0.000200697	8.30404e-05	0.000170292	0.000182814	0.000223354	0.000380204	0.000711648	0.000281092	0.000208097	0.000286422
828	0.000210466	0.000160784	1.76893e-06	0.000335944	6.62046e-05	0.000161459	3.54273e-07	0.00105655	0.000198026	8.39098e-05	0.000170604	0.000186582	0.000227467	0.000377787	0.00071955	0.000278039	0.000215387	0.000289804
829	0.000210858	0.000159343	1.77909e-06	0.000333136	6.72195e-05	0.000162332	3.49775e-07	0.00122519	0.000195328	8.48114e-05	0.000170964	0.000190091	0.000231905	0.000374874	0.000725688	0.000275109	0.00022263	0.000293336
830	0.000211289	0.000158093	1.7942e-06	0.000330349	6.8258e-05	0.000163241	3.46908e-07	0.00135968	0.000192614	8.57424e-05	0.000171372	0.000192838	0.000236701	0.00037153	0.000730035	0.000272338	0.000229778	0.000297004
831	0.000211759	0.000157021	1.81416e-06	0.00032759	6.93199e-05	0.000164187	3.45399e-07	0.00144103	0.000189896	8.67007e-05	0.000171827	0.000194378	0.000241888	0.000367829	0.000732588	0.000269784	0.000236785	0.000300793
832	0.00021227	0.000156114	1.83891e-06	0.000324864	7.04048e-05	0.000165171	3.45023e-07	0.00145689	0.000187185	8.76844e-05	0.000172328	0.000194421	0.000247502	0.000363844	0.000733371	0.00026753	0.000243609	0.000304689
833	0.000212825	0.000155362	1.86839e-06	0.000322177	7.15124e-05	0.000166194	3.45594e-07	0.00140462	0.000184493	8.86918e-05	0.000172873	0.000192906	0.000253583	0.000359645	0.000732435	0.000265681	0.000250209	0.000308681
834	0.000213425	0.000154754	1.90256e-06	0.000319534	7.26427e-05	0.000167256	3.46958e-07	0.00129189	0.000181832	8.97216e-05	0.000173461	0.000190014	0.000260169	0.000355297	0.000729852	0.00026436	0.000256546	0.000312755
835	0.00021407	0.000154281	1.94138e-06	0.00031694	7.37953e-05	0.000168357	3.4899e-07	0.00113483	0.000179213	9.07725e-05	0.000174093	0.000186125	0.0002673	0.000350856	0.000725716	0.000263704	0.000262588	0.000316901
836	0.000214763	0.000153936	1.98482e-06	0.000314399	7.49701e-05	0.000169498	3.51587e-07	0.000954145	0.000176646	9.18436e-05	0.000174765	0.000181728	0.000275016	0.000346368	0.000720137	0.000263857	0.000268305	0.000321111
837	0.000215505	0.000153709	2.03288e-06	0.000311915	7.61669e-05	0.000170679	3.54668e-07	0.000770674	0.000174144	9.2934e-05	0.000175479	0.000177314	0.000283356	0.000341872	0.000713243	0.000264961	0.000273676	0.000325377
838	0.000216295	0.000153596	2.08554e-06	0.00030949	7.73855e-05	0.000171901	3.58167e-07	0.000601508	0.000171717	9.4043e-05	0.000176233	0.000173285	0.000292354	0.000337395	0.000705175	0.000267148	0.000278682	0.000329693
839	0.000217136	0.000153588	2.1428e-06	0.000307127	7.8626e-05	0.000173163	3.62033e-07	0.000457767	0.000169375	9.51701e-05	0.000177027	0.000169905	0.000302044	0.000332959	0.000696083	0.000270526	0.000283313	0.000334056
840	0.000218027	0.00015368	2.20466e-06	0.000304828	7.9888e-05	0.000174465	3.66226e-07	0.000344183	0.000167129	9.63148e-05	0.000177859	0.000167284	0.000312451	0.000328578	0.000686123	0.000275172	0.000287562	0.000338463
841	0.00021897	0.000153867	2.27114e-06	0.000302595	8.11717e-05	0.000175808	3.70719e-07	0.000260173	0.00016499	9.74768e-05	0.000178729	0.000165412	0.000323595	0.000324262	0.000675456	0.000281118	0.000291431	0.000342914
842	0.000219963	0.000154142	2.34227e-06	0.000300427	8.24768e-05	0.000177191	3.75489e-07	0.000201682	0.000162967	9.86557e-05	0.000179638	0.000164192	0.000335487	0.000320016	0.000664242	0.000288347	0.000294925	0.00034741
843	0.000221008	0.000154501	2.41805e-06	0.000298326	8.38034e-05	0.000178614	3.80525e-07	0.000163099	0.000161071	9.98513e-05	0.000180583	0.000163493	0.00034813	0.000315846	0.000652639	0.00029678	0.000298056	0.000351953
844	0.000222104	0.000154939	2.49854e-06	0.000296292	8.51514e-05	0.000180077	3.85818e-07	0.000138765	0.000159312	0.000101064	0.000181565	0.000163184	0.000361514	0.000311755	0.000640799	0.000306277	0.00030084	0.000356546
845	0.000223252	0.000155452	2.58377e-06	0.000294322	8.65207e-05	0.00018158	3.91367e-07	0.000123864	0.000157699	0.000102292	0.000182584	0.00016315	0.000375616	0.000307747	0.000628864	0.000316635	0.000303296	0.000361193
846	0.000224451	0.000156035	2.67378e-06	0.000292417	8.79113e-05	0.000183121	3.97176e-07	0.000114777	0.000156243	0.000103537	0.000183639	0.000163309	0.000390401	0.000303824	0.000616965	0.000327593	0.000305449	0.000365899
847	0.000225701	0.000156686	2.76864e-06	0.000290575	8.93232e-05	0.000184702	4.03252e-07	0.000109036	0.000154952	0.000104798	0.00018473	0.000163602	0.000405818	0.00029999	0.000605218	0.000338842	0.000307325	0.000370668
848	0.000227002	0.000157399	2.86839e-06	0.000288793	9.07563e-05	0.000186321	4.09608e-07	0.000105102	0.000153838	0.000106075	0.000185857	0.000163994	0.000421802	0.000296246	0.000593724	0.000350034	0.000308949	0.000375505
849	0.000228352	0.000158173	2.9731e-06	0.000287071	9.22107e-05	0.000187977	4.16258e-07	0.000102087	0.00015291	0.000107369	0.000187018	0.000164464	0.000438274	0.000292593	0.000582562	0.000360805	0.000310351	0.000380412
850	0.000229752	0.000159005	3.08285e-06	0.000285404	9.36863e-05	0.000189671	4.23223e-07	9.952e-05	0.000152177	0.000108679	0.000188215	0.000165001	0.000455139	0.00028903	0.000571793	0.000370785	0.000311558	0.000385393
851	0.000231201	0.00015989	3.19771e-06	0.00028379	9.51832e-05	0.000191402	4.30524e-07	9.7168e-05	0.000151651	0.000110004	0.000189447	0.000165602	0.000472289	0.000285552	0.000561457	0.000379626	0.000312596	0.00039045
852	0.000232698	0.000160828	3.31776e-06	0.000282226	9.67012e-05	0.00019317	4.38188e-07	9.49284e-05	0.000151341	0.000111346	0.000190714	0.000166263	0.000489605	0.000282152	0.000551573	0.000387018	0.000313491	0.000395584
853	0.000234243	0.000161816	3.44309e-06	0.000280709	9.82404e-05	0.000194973	4.46245e-07	9.27633e-05	0.000151258	0.000112705	0.000192016	0.000166986	0.000506955	0.000278822	0.000542137	0.000392703	0.000314266	0.000400794
854	0.000235834	0.000162852	3.57381e-06	0.000279235	9.98008e-05	0.000196811	4.54729e-07	9.0666e-05	0.000151412	0.000114079	0.000193352	0.000167769	0.000524202	0.000275546	0.000533127	0.000396494	0.00031494	0.000406078
855	0.000237472	0.000163933	3.71001e-06	0.000277802	0.000101382	0.000198684	4.63677e-07	8.86438e-05	0.000151813	0.00011547	0.000194723	0.000168615	0.000541201	0.00027231	0.0005245	0.000398279	0.00031553	0.000411433
856	0.000239154	0.000165059	3.85181e-06	0.000276405	0.000102985	0.000200591	4.73131e-07	8.67117e-05	0.000152472	0.000116877	0.000196129	0.000169523	0.000557807	0.000269095	0.000516199	0.000398025	0.00031605	0.000416852
857	0.000240881	0.000166227	3.99936e-06	0.000275041	0.000104609	0.000202532	4.83138e-07	8.48888e-05	0.000153398	0.0001183	0.000197569	0.000170495	0.000573874	0.000265883	0.000508153	0.000395781	0.000316512	0.000422327
858	0.000242651	0.000167436	4.15283e-06	0.000273706	0.000106254	0.000204506	4.93747e-07	8.31978e-05	0.000154603	0.00011974	0.000199044	0.000171532	0.00058926	0.000262653	0.000500278	0.000391662	0.000316923	0.00042785
859	0.000244464	0.000168686	4.31243e-06	0.000272397	0.00010792	0.000206513	5.05016e-07	8.16644e-05	0.000156094	0.000121196	0.000200553	0.000172636	0.000603833	0.000259388	0.000492486	0.000385848	0.000317291	0.000433407
860	0.000246319	0.000169974	4.47847e-06	0.000271111	0.000109606	0.000208551	5.17005e-07	8.03175e-05	0.000157881	0.000122668	0.000202096	0.000173807	0.000617469	0.00025607	0.000484683	0.00037856	0.00031762	0.000438984
861	0.000248214	0.0001713	4.65138e-06	0.000269844	0.000111314	0.000210622	5.29782e-07	7.91896e-05	0.000159973	0.000124157	0.000203674	0.000175047	0.000630059	0.000252684	0.000476777	0.000370052	0.000317916	0.000444566
862	0.00025015	0.000172664	4.83184e-06	0.000268593	0.000113043	0.000212723	5.4342e-07	7.83167e-05	0.000162375	0.000125663	0.000205287	0.000176356	0.00064151	0.000249221	0.000468681	0.00036059	0.000318188	0.000450134
863	0.000252126	0.000174063	5.02087e-06	0.000267355	0.000114792	0.000214856	5.57999e-07	7.77384e-05	0.000165095	0.000127185	0.000206934	0.000177736	0.00065175	0.000245672	0.000460315	0.000350443	0.000318445	0.000455666
864	0.00025414	0.000175498	5.22006e-06	0.000266127	0.000116562	0.000217019	5.73608e-07	7.74979e-05	0.000168136	0.000128723	0.000208616	0.000179189	0.000660723	0.000242037	0.000451612	0.000339863	0.000318702	0.000461141
865	0.000256192	0.000176967	5.43192e-06	0.000264906	0.000118353	0.000219212	5.90342e-07	7.76421e-05	0.000171501	0.000130278	0.000210332	0.000180715	0.0006684	0.000238318	0.000442518	0.000329082	0.000318982	0.000466533
866	0.000258282	0.000178471	5.66034e-06	0.000263691	0.000120164	0.000221435	6.08305e-07	7.82212e-05	0.000175192	0.00013185	0.000212082	0.000182315	0.000674771	0.000234521	0.000433	0.000318301	0.000319315	0.000471816
867	0.000260409	0.000180008	5.91133e-06	0.000262478	0.000121996	0.000223688	6.2761e-07	7.92883e-05	0.000179207	0.000133438	0.000213867	0.000183989	0.000679849	0.000230658	0.000423042	0.000307692	0.000319742	0.000476964
868	0.000262572	0.000181578	6.19397e-06	0.000261266	0.000123848	0.000225971	6.48382e-07	8.0899e-05	0.000183543	0.000135043	0.000215687	0.00018574	0.000683668	0.000226745	0.000412648	0.000297389	0.000320312	0.000481946
869	0.00026477	0.000183181	6.52188e-06	0.000260052	0.00012572	0.000228283	6.70753e-07	8.31105e-05	0.000188192	0.000136665	0.000217541	0.000187566	0.000686284	0.0002228	0.000401844	0.000287497	0.000321087	0.000486735
870	0.000267005	0.000184817	6.91509e-06	0.000258836	0.000127612	0.000230624	6.9487e-07	8.59811e-05	0.000193147	0.000138303	0.000219429	0.000189469	0.000687769	0.000218846	0.000390676	0.000278091	0.000322139	0.000491301
871	0.000269274	0.000186484	7.40254e-06	0.000257616	0.000129524	0.000232994	7.2089e-07	8.95688e-05	0.000198396	0.000139957	0.000221352	0.000191449	0.000688214	0.000214904	0.000379209	0.000269223	0.000323547	0.000495616
872	0.000271578	0.000188184	8.02531e-06	0.00025639	0.000131455	0.000235394	7.48983e-07	9.39301e-05	0.000203923	0.000141629	0.00022331	0.000193506	0.000687722	0.000211	0.000367525	0.000260922	0.000325395	0.000499653
873	0.000273917	0.000189914	8.84056e-06	0.000255159	0.000133406	0.000237823	7.79336e-07	9.91184e-05	0.00020971	0.000143317	0.000225302	0.000195639	0.000686406	0.000207159	0.00035572	0.000253204	0.000327763	0.000503388
874	0.00027629	0.000191676	9.9263e-06	0.00025392	0.000135376	0.000240281	8.12149e-07	0.000105183	0.000215738	0.000145022	0.000227328	0.00019785	0.000684389	0.000203403	0.000343898	0.000246074	0.000330726	0.000506799
875	0.000278698	0.000193469	1.13868e-05	0.000252674	0.000137366	0.000242768	8.47636e-07	0.000112166	0.000221981	0.000146744	0.000229389	0.000200139	0.000681798	0.000199757	0.000332174	0.00023953	0.000334344	0.000509868
876	0.000281139	0.000195293	1.33583e-05	0.00025142	0.000139374	0.000245286	8.86033e-07	0.000120102	0.000228414	0.000148482	0.000231484	0.000202505	0.000678761	0.000196241	0.000320663	0.000233566	0.00033865	0.000512583
877	0.000283615	0.000197147	1.60153e-05	0.000250158	0.0001414	0.000247833	9.27591e-07	0.000129015	0.000235007	0.000150237	0.000233614	0.000204951	0.000675405	0.000192876	0.000309479	0.000228175	0.000343649	0.000514935
878	0.000286126	0.000199031	1.95753e-05	0.000248889	0.000143445	0.00025041	9.72582e-07	0.000138918	0.000241728	0.000152009	0.000235777	0.000207478	0.000671856	0.000189677	0.000298734	0.000223353	0.000349304	0.000516921
879	0.000288671	0.000200946	2.43032e-05	0.000247613	0.000145508	0.000253018	1.0213e-06	0.000149809	0.000248544	0.000153798	0.000237975	0.000210088	0.000668231	0.000186659	0.00028853	0.000219098	0.000355535	0.000518547
880	0.000291251	0.00020289	3.05127e-05	0.000246329	0.000147588	0.000255657	1.07405e-06	0.00016167	0.000255419	0.000155603	0.000240207	0.000212784	0.00066464	0.000183833	0.000278959	0.000215412	0.000362214	0.000519822
881	0.000293866	0.000204865	3.85639e-05	0.00024504	0.000149686	0.000258327	1.13118e-06	0.000174466	0.000262318	0.000157426	0.000242473	0.000215569	0.000661185	0.000181208	0.0002701	0.000212302	0.000369168	0.000520765
882	0.000296516	0.000206868	4.88567e-05	0.000243745	0.000151802	0.000261029	1.19306e-06	0.000188143	0.000269203	0.000159265	0.000244774	0.000218447	0.000657957	0.00017879	0.00026202	0.00020978	0.000376185	0.0005214
883	0.000299203	0.000208901	6.18178e-05	0.000242445	0.000153934	0.000263763	1.26006e-06	0.000202629	0.000276038	0.000161121	0.000247108	0.000221424	0.000655035	0.000176582	0.000254769	0.000207861	0.000383022	0.00052176
884	0.000301926	0.000210964	7.78811e-05	0.000241142	0.000156082	0.000266529	1.3326e-06	0.00021783	0.000282784	0.000162995	0.000249476	0.000224502	0.000652487	0.000174587	0.000248387	0.000206562	0.00038942	0.000521882
885	0.000304686	0.000213055	9.74604e-05	0.000239836	0.000158247	0.000269329	1.41114e-06	0.000233634	0.000289408	0.000164885	0.000251877	0.000227685	0.000650368	0.000172804	0.000242897	0.000205901	0.000395119	0.000521811
886	0.000307484	0.000215175	0.000120917	0.00023853	0.000160427	0.000272163	1.49615e-06	0.000249906	0.000295875	0.000166792	0.000254312	0.000230975	0.000648723	0.000171232	0.000238312	0.000205891	0.000399879	0.000521595
887	0.00031032	0.000217323	0.000148518	0.000237224	0.000162623	0.000275031	1.58814e-06	0.000266496	0.000302152	0.000168716	0.000256781	0.000234371	0.000647586	0.000169866	0.000234637	0.000206541	0.000403493	0.000521291
888	0.000313195	0.0002195	0.000180399	0.000235919	0.000164834	0.000277935	1.68765e-06	0.000283235	0.000308211	0.000170658	0.000259283	0.000237868	0.000646979	0.000168703	0.000231867	0.000207848	0.000405808	0.000520955
889	0.000316111	0.000221704	0.000216517	0.000234619	0.00016706	0.000280874	1.79526e-06	0.00029994	0.000314025	0.000172617	0.000261819	0.000241458	0.000646916	0.000167737	0.000229995	0.000209797	0.000406734	0.000520648
890	0.000319067	0.000223936	0.000256616	0.000233323	0.0001693	0.000283849	1.9116e-06	0.000316415	0.000319572	0.000174592	0.000264387	0.000245128	0.000647401	0.000166965	0.000229012	0.000212355	0.000406252	0.000520434
891	0.000322065	0.000226196	0.000300198	0.000232034	0.000171554	0.000286862	2.03731e-06	0.000332457	0.000324833	0.000176586	0.000266989	0.000248857	0.000648431	0.00016638	0.000228907	0.000215468	0.000404418	0.000520375
892	0.000325106	0.000228483	0.000346505	0.000230754	0.000173822	0.000289913	2.17311e-06	0.000347856	0.000329792	0.000178596	0.000269623	0.000252621	0.000649999	0.000165977	0.000229677	0.000219062	0.000401354	0.000520533
893	0.000328191	0.000230797	0.000394527	0.000229485	0.000176102	0.000293003	2.31972e-06	0.000362405	0.00033444	0.000180625	0.00027229	0.000256387	0.00065209	0.000165749	0.000231319	0.000223042	0.000397243	0.00052097
894	0.000331321	0.000233137	0.000443018	0.000228228	0.000178396	0.000296132	2.47794e-06	0.000375895	0.000338771	0.00018267	0.00027499	0.000260119	0.000654684	0.000165693	0.00023384	0.000227294	0.000392315	0.000521743
895	0.000334497	0.000235504	0.000490545	0.000226986	0.000180701	0.000299301	2.64859e-06	0.00038813	0.000342783	0.000184734	0.000277722	0.000263776	0.000657762	0.000165802	0.000237252	0.00023169	0.000386828	0.000522906
896	0.00033772	0.000237896	0.000535553	0.00022576	0.000183019	0.000302511	2.83257e-06	0.000398923	0.000346479	0.000186815	0.000280486	0.000267315	0.000661299	0.000166072	0.000241574	0.000236093	0.000381048	0.000524508
897	0.000340991	0.000240313	0.000576444	0.000224553	0.000185348	0.000305763	3.03081e-06	0.000408106	0.000349865	0.000188915	0.000283283	0.000270694	0.00066527	0.000166496	0.000246833	0.000240365	0.000375237	0.000526592
898	0.000344313	0.000242756	0.000611673	0.000223368	0.000187688	0.000309057	3.24428e-06	0.000415531	0.000352954	0.000191032	0.000286111	0.000273872	0.000669649	0.00016707	0.000253059	0.000244377	0.000369636	0.000529192
899	0.000347685	0.000245223	0.000639844	0.000222206	0.000190038	0.000312394	3.47403e-06	0.000421074	0.000355758	0.000193168	0.000288971	0.000276813	0.000674412	0.000167789	0.000260284	0.000248018	0.00036445	0.000532337
900	0.00035111	0.000247715	0.000659802	0.00022107	0.000192399	0.000315775	3.72116e-06	0.00042464	0.000358296	0.000195322	0.000291863	0.000279488	0.000679534	0.000168647	0.000268539	0.000251204	0.000359844	0.000536046
901	0.000354589	0.00025023	0.000670717	0.000219962	0.00019477	0.0003192	3.98681e-06	0.000426161	0.000360588	0.000197494	0.000294785	0.000281878	0.000684991	0.000169638	0.000277848	0.000253887	0.000355936	0.000540327
902	0.000358123	0.000252768	0.000672139	0.000218885	0.00019715	0.00032267	4.27219e-06	0.000425602	0.000362656	0.000199685	0.000297739	0.000283975	0.000690763	0.000170756	0.000288227	0.000256058	0.000352801	0.00054518
903	0.000361713	0.000255329	0.000664031	0.000217841	0.000199538	0.000326186	4.57858e-06	0.000422963	0.000364524	0.000201895	0.000300724	0.00028578	0.000696828	0.000171992	0.000299675	0.000257753	0.000350471	0.000550597
904	0.000365362	0.000257912	0.000646773	0.000216834	0.000201936	0.000329747	4.90731e-06	0.000418271	0.000366218	0.000204124	0.000303739	0.000287308	0.000703171	0.000173341	0.000312171	0.000259052	0.000348946	0.000556555
905	0.000369071	0.000260517	0.000621135	0.000215865	0.000204341	0.000333356	5.25978e-06	0.00041159	0.000367762	0.000206373	0.000306785	0.000288585	0.000709776	0.000174792	0.00032567	0.000260076	0.000348196	0.000563027
906	0.00037284	0.000263142	0.000588221	0.000214939	0.000206754	0.000337011	5.63744e-06	0.00040301	0.000369183	0.000208641	0.000309861	0.000289642	0.000716631	0.000176336	0.000340099	0.00026098	0.000348175	0.000569974
907	0.000376673	0.000265788	0.000549392	0.000214058	0.000209175	0.000340713	6.04183e-06	0.000392651	0.000370505	0.000210928	0.000312967	0.000290523	0.000723725	0.000177964	0.000355353	0.000261944	0.000348828	0.000577348
908	0.00038057	0.000268454	0.000506175	0.000213225	0.000211602	0.000344463	6.47454e-06	0.000380657	0.000371752	0.000213236	0.000316102	0.000291271	0.000731052	0.000179664	0.000371299	0.00026316	0.000350095	0.000585096
909	0.000384532	0.000271139	0.000460166	0.000212444	0.000214036	0.00034826	6.93723e-06	0.000367194	0.000372947	0.000215564	0.000319267	0.000291936	0.000738606	0.000181425	0.000387771	0.000264822	0.000351925	0.000593159
910	0.000388563	0.000273843	0.000412935	0.000211718	0.000216477	0.000352105	7.43162e-06	0.000352445	0.00037411	0.000217913	0.000322461	0.000292563	0.000746384	0.000183235	0.000404579	0.00026711	0.000354275	0.000601472
911	0.000392662	0.000276564	0.000365942	0.000211051	0.000218923	0.000355999	7.95953e-06	0.000336604	0.000375258	0.000220282	0.000325684	0.000293198	0.000754385	0.00018508	0.000421511	0.000270178	0.000357119	0.000609971
912	0.000396832	0.000279302	0.00032047	0.000210446	0.000221375	0.00035994	8.52281e-06	0.000319877	0.000376409	0.000222673	0.000328935	0.00029388	0.00076261	0.000186949	0.00043834	0.000274147	0.000360447	0.000618588
913	0.000401075	0.000282056	0.000277572	0.000209907	0.000223832	0.000363928	9.1234e-06	0.000302471	0.000377574	0.000225085	0.000332214	0.000294643	0.000771062	0.000188829	0.000454838	0.00027909	0.000364269	0.000627259
914	0.000405392	0.000284826	0.000238052	0.00020944	0.000226295	0.000367964	9.76331e-06	0.000284594	0.000378764	0.000227518	0.000335522	0.000295514	0.000779744	0.000190707	0.000470777	0.000285031	0.000368615	0.000635922
915	0.000409784	0.000287611	0.000202453	0.000209047	0.000228762	0.000372047	1.04446e-05	0.000266451	0.000379986	0.000229974	0.000338856	0.000296513	0.00078866	0.000192571	0.00048595	0.000291942	0.000373533	0.00064452
916	0.000414254	0.00029041	0.000171073	0.000208734	0.000231234	0.000376176	1.11694e-05	0.000248236	0.000381245	0.000232453	0.000342218	0.000297654	0.000797815	0.000194411	0.000500173	0.000299741	0.000379091	0.000653004
917	0.000418803	0.000293221	0.000143989	0.000208506	0.00023371	0.000380352	1.194e-05	0.000230134	0.000382543	0.000234955	0.000345607	0.000298943	0.000807213	0.000196216	0.000513297	0.000308299	0.000385369	0.000661331
918	0.000423433	0.000296045	0.000121094	0.000208367	0.00023619	0.000384572	1.27586e-05	0.000212313	0.000383878	0.000237479	0.000349022	0.000300382	0.00081686	0.000197979	0.000525217	0.000317445	0.000392459	0.000669468
919	0.000428145	0.000298881	0.000102142	0.000208322	0.000238675	0.000388837	1.36275e-05	0.000194927	0.000385249	0.000240028	0.000352463	0.00030197	0.000826759	0.000199692	0.000535873	0.000326976	0.000400456	0.000677394
920	0.000432942	0.000301726	8.67866e-05	0.000208378	0.000241163	0.000393145	1.45492e-05	0.000178111	0.000386649	0.000242601	0.00035593	0.0003037	0.000836913	0.00020135	0.000545257	0.000336664	0.000409455	0.000685094
921	0.000437823	0.000304582	7.462e-05	0.000208539	0.000243655	0.000397495	1.55261e-05	0.000161979	0.000388074	0.000245199	0.000359422	0.000305564	0.000847323	0.00020295	0.000553408	0.000346272	0.00041954	0.000692567
922	0.000442792	0.000307446	6.52108e-05	0.000208811	0.000246151	0.000401886	1.65607e-05	0.000146627	0.000389515	0.000247821	0.000362938	0.000307554	0.000857989	0.000204491	0.000560411	0.000355562	0.000430775	0.000699819
923	0.00044785	0.000310317	5.81305e-05	0.000209202	0.000248651	0.000406317	1.76556e-05	0.000132131	0.000390963	0.000250469	0.000366479	0.00030966	0.000868907	0.000205974	0.000566391	0.000364304	0.000443199	0.000706866
924	0.000452999	0.000313196	5.29739e-05	0.000209717	0.000251155	0.000410785	1.88134e-05	0.000118544	0.000392409	0.000253144	0.000370044	0.000311873	0.000880072	0.000207402	0.000571501	0.000372293	0.000456812	0.000713734
925	0.000458239	0.00031608	4.93742e-05	0.000210363	0.000253662	0.000415291	2.00368e-05	0.000105906	0.000393845	0.000255845	0.000373632	0.000314184	0.000891476	0.000208781	0.000575918	0.00037935	0.000471573	0.000720452
926	0.000463573	0.000318969	4.70102e-05	0.000211147	0.000256173	0.00041983	2.13285e-05	9.42362e-05	0.000395261	0.000258573	0.000377243	0.000316585	0.000903108	0.000210117	0.000579827	0.000385334	0.00048739	0.00072706
927	0.000469002	0.000321861	4.56093e-05	0.000212075	0.000258688	0.000424403	2.26913e-05	8.3538e-05	0.00039665	0.000261329	0.000380876	0.000319068	0.000914953	0.00021142	0.000583411	0.000390145	0.000504125	0.000733596
928	0.000474528	0.000324756	4.49467e-05	0.000213157	0.000261207	0.000429006	2.41279e-05	7.3802e-05	0.000398004	0.000264112	0.000384531	0.000321628	0.000926994	0.000212699	0.000586846	0.000393727	0.000521591	0.000740107
929	0.000480152	0.000327653	4.48417e-05	0.000214398	0.000263731	0.000433637	2.56411e-05	6.50062e-05	0.000399318	0.000266925	0.000388207	0.000324259	0.000939209	0.000213967	0.000590285	0.000396069	0.000539561	0.000746637
930	0.000485875	0.000330551	4.51527e-05	0.000215808	0.000266259	0.000438295	2.72338e-05	5.71187e-05	0.000400588	0.000269767	0.000391904	0.000326958	0.000951575	0.000215235	0.000593855	0.000397204	0.000557778	0.000753231
931	0.000491699	0.000333448	4.57709e-05	0.000217394	0.000268792	0.000442976	2.89089e-05	5.00989e-05	0.000401811	0.000272639	0.00039562	0.000329721	0.000964063	0.000216518	0.000597655	0.000397208	0.000575971	0.000759935
932	0.000497626	0.000336343	4.66151e-05	0.000219164	0.00027133	0.000447679	3.06692e-05	4.39003e-05	0.000402989	0.000275541	0.000399356	0.000332547	0.000976643	0.000217828	0.000601746	0.000396194	0.000593874	0.00076679
933	0.000503656	0.000339236	4.76257e-05	0.000221128	0.000273874	0.000452399	3.25175e-05	3.84717e-05	0.000404123	0.000278474	0.000403111	0.000335432	0.000989282	0.000219177	0.000606157	0.000394305	0.000611239	0.000773833
934	0.00050979	0.000342125	4.87599e-05	0.000223293	0.000276424	0.000457136	3.44567e-05	3.37591e-05	0.000405218	0.000281438	0.000406884	0.000338377	0.00100194	0.00022058	0.000610883	0.00039171	0.000627855	0.000781098
935	0.000516031	0.000345009	4.99878e-05	0.000225669	0.00027898	0.000461885	3.64898e-05	2.9707e-05	0.000406281	0.000284434	0.000410674	0.000341382	0.00101459	0.000222045	0.00061589	0.000388595	0.000643568	0.000788614
936	0.000522379	0.000347888	5.12888e-05	0.000228264	0.000281542	0.000466643	3.86194e-05	2.62597e-05	0.000407321	0.000287463	0.000414481	0.000344445	0.00102718	0.000223585	0.000621118	0.000385156	0.000658286	0.000796403
937	0.000528835	0.000350759	5.26493e-05	0.000231088	0.000284113	0.000471409	4.08484e-05	2.33628e-05	0.000408351	0.000290526	0.000418303	0.000347569	0.00103968	0.000225207	0.000626488	0.000381589	0.000671987	0.00080448
938	0.0005354	0.000353622	5.40602e-05	0.00023415	0.000286691	0.000476177	4.31796e-05	2.09634e-05	0.000409383	0.000293621	0.000422141	0.000350754	0.00105204	0.000226918	0.000631905	0.000378087	0.000684717	0.000812854
939	0.000542076	0.000356477	5.5516e-05	0.000237458	0.000289278	0.000480946	4.56156e-05	1.90116e-05	0.000410435	0.000296751	0.000425993	0.000354002	0.00106423	0.000228723	0.000637269	0.000374828	0.000696586	0.000821526
940	0.000548863	0.000359321	5.70135e-05	0.000241023	0.000291874	0.000485712	4.81592e-05	1.74603e-05	0.000411523	0.000299915	0.000429859	0.000357315	0.00107619	0.000230624	0.000642473	0.000371974	0.000707756	0.000830491
941	0.000555763	0.000362153	5.85506e-05	0.000244852	0.00029448	0.000490471	5.08129e-05	1.62663e-05	0.000412667	0.000303114	0.000433738	0.000360695	0.0010879	0.000232622	0.000647417	0.000369662	0.000718425	0.000839734
942	0.000562775	0.000364974	6.01266e-05	0.000248956	0.000297097	0.00049522	5.35792e-05	1.539e-05	0.000413888	0.000306348	0.000437629	0.000364145	0.00109932	0.000234716	0.000652007	0.000368007	0.000728807	0.000849234
943	0.0005699	0.000367781	6.17412e-05	0.000253344	0.000299725	0.000499955	5.64606e-05	1.47957e-05	0.000415208	0.000309618	0.000441531	0.000367667	0.0011104	0.000236902	0.000656162	0.000367095	0.000739118	0.000858964
944	0.00057714	0.000370573	6.33945e-05	0.000258023	0.000302366	0.000504674	5.94593e-05	1.44514e-05	0.00041665	0.000312925	0.000445443	0.000371265	0.00112112	0.000239174	0.000659815	0.000366984	0.000749556	0.000868889
945	0.000584495	0.00037335	6.5087e-05	0.000263002	0.00030502	0.000509371	6.25776e-05	1.43294e-05	0.000418239	0.000316267	0.000449364	0.000374942	0.00113145	0.000241525	0.000662916	0.000367707	0.000760287	0.000878968
946	0.000591964	0.00037611	6.68192e-05	0.00026829	0.000307689	0.000514045	6.58176e-05	1.44052e-05	0.000419997	0.000319646	0.000453294	0.0003787	0.00114136	0.000243947	0.000665436	0.000369275	0.000771436	0.000889157
947	0.000599549	0.000378853	6.85917e-05	0.000273894	0.000310372	0.000518692	6.91811e-05	1.46579e-05	0.00042195	0.000323061	0.000457232	0.000382543	0.00115083	0.000246431	0.000667364	0.000371676	0.00078308	0.000899406
948	0.000607249	0.000381578	7.04052e-05	0.000279822	0.000313072	0.000523307	7.26702e-05	1.50699e-05	0.000424122	0.000326514	0.000461176	0.000386475	0.00115984	0.000248966	0.000668712	0.00037488	0.000795246	0.000909664
949	0.000615064	0.000384282	7.22604e-05	0.000286081	0.00031579	0.000527887	7.62863e-05	1.56264e-05	0.000426536	0.000330003	0.000465125	0.000390498	0.00116839	0.000251542	0.000669506	0.000378845	0.000807915	0.000919879
950	0.000622995	0.000386967	7.4158e-05	0.000292678	0.000318525	0.00053243	8.00309e-05	1.63154e-05	0.000429218	0.000333529	0.000469079	0.000394617	0.00117645	0.000254147	0.000669796	0.000383519	0.000821026	0.000929998
951	0.000631041	0.00038963	7.60988e-05	0.000299618	0.00032128	0.000536931	8.39055e-05	1.71274e-05	0.000432188	0.000337091	0.000473037	0.000398833	0.00118402	0.000256772	0.000669644	0.000388842	0.000834487	0.00093997
952	0.000639202	0.00039227	7.80834e-05	0.000306907	0.000324056	0.000541388	8.79111e-05	1.80549e-05	0.00043547	0.00034069	0.000476997	0.00040315	0.00119111	0.000259407	0.000669127	0.000394754	0.000848185	0.000949746
953	0.000647476	0.000394888	8.01126e-05	0.000314549	0.000326854	0.000545797	9.20485e-05	1.90923e-05	0.000439084	0.000344325	0.000480958	0.00040757	0.00119772	0.000262043	0.000668335	0.00040119	0.000861991	0.000959283
954	0.000655864	0.000397482	8.2187e-05	0.000322548	0.000329675	0.000550154	9.63186e-05	2.02357e-05	0.00044305	0.000347996	0.00048492	0.000412096	0.00120386	0.000264671	0.000667364	0.00040809	0.000875779	0.000968539
955	0.000664364	0.00040005	8.43075e-05	0.000330908	0.00033252	0.000554458	0.000100722	2.14829e-05	0.000447385	0.000351702	0.000488881	0.000416731	0.00120953	0.000267286	0.000666315	0.000415395	0.000889424	0.000977479
956	0.000672975	0.000402593	8.64746e-05	0.000339629	0.00033539	0.000558704	0.000105258	2.28326e-05	0.000452107	0.000355443	0.00049284	0.000421475	0.00121476	0.000269883	0.000665293	0.00042305	0.000902819	0.000986073
957	0.000681696	0.00040511	8.8689e-05	0.000348715	0.000338288	0.000562891	0.000109928	2.42849e-05	0.00045723	0.000359217	0.000496796	0.00042633	0.00121956	0.000272457	0.0006644	0.000431004	0.000915873	0.000994295
958	0.000690525	0.0004076	9.09515e-05	0.000358164	0.000341214	0.000567015	0.000114731	2.58407e-05	0.000462767	0.000363025	0.000500748	0.000431298	0.00122395	0.000275007	0.000663734	0.000439211	0.000928518	0.00100212
959	0.00069946	0.000410062	9.32625e-05	0.000367976	0.000344169	0.000571074	0.000119666	2.75018e-05	0.000468729	0.000366865	0.000504695	0.000436379	0.00122796	0.000277532	0.000663386	0.000447629	0.000940712	0.00100953
960	0.000708499	0.000412495	9.56229e-05	0.000378149	0.000347155	0.000575065	0.000124733	2.92708e-05	0.000475124	0.000370736	0.000508635	0.000441574	0.00123161	0.000280034	0.000663437	0.00045622	0.000952434	0.00101651
961	0.00071764	0.0004149	9.8033e-05	0.000388679	0.000350174	0.000578986	0.000129931	3.11507e-05	0.000481958	0.000374636	0.000512567	0.000446882	0.00123492	0.000282514	0.000663957	0.000464949	0.000963687	0.00102304
962	0.00072688	0.000417274	0.000100494	0.000399564	0.000353226	0.000582836	0.000135257	3.31453e-05	0.000489235	0.000378565	0.000516491	0.000452303	0.00123793	0.000284975	0.000665001	0.000473784	0.000974493	0.00102909
963	0.000736215	0.000419619	0.000103005	0.000410796	0.000356313	0.000586611	0.000140712	3.5259e-05	0.000496956	0.000382521	0.000520405	0.000457835	0.00124066	0.000287421	0.00066661	0.000482695	0.00098489	0.00103463
964	0.000745644	0.000421933	0.000105568	0.00042237	0.000359436	0.00059031	0.000146291	3.74963e-05	0.00050512	0.000386503	0.000524307	0.000463476	0.00124313	0.000289855	0.000668811	0.000491657	0.000994925	0.00103965
965	0.000755161	0.000424215	0.000108183	0.000434277	0.000362597	0.000593933	0.000151994	3.98627e-05	0.00051372	0.000390508	0.000528196	0.000469226	0.00124539	0.000292282	0.000671614	0.000500642	0.00100465	0.00104411
966	0.000764764	0.000426466	0.00011085	0.000446508	0.000365797	0.000597476	0.000157818	4.23637e-05	0.00052275	0.000394534	0.000532072	0.000475079	0.00124746	0.000294706	0.000675016	0.000509627	0.00101412	0.00104797
967	0.000774448	0.000428685	0.00011357	0.000459053	0.000369037	0.00060094	0.000163759	4.50057e-05	0.000532197	0.00039858	0.000535933	0.000481033	0.00124936	0.000297129	0.000679001	0.000518588	0.00102338	0.00105118
968	0.000784208	0.000430872	0.000116344	0.000471899	0.000372318	0.000604322	0.000169814	4.77952e-05	0.000542049	0.000402644	0.000539777	0.000487085	0.00125113	0.000299553	0.000683541	0.000527503	0.00103246	0.0010537
969	0.00079404	0.000433026	0.00011917	0.000485034	0.000375643	0.000607622	0.00017598	5.07398e-05	0.000552286	0.000406722	0.000543604	0.000493228	0.00125279	0.00030198	0.000688599	0.000536352	0.00104138	0.00105548
970	0.000803938	0.000435147	0.000122051	0.000498442	0.000379011	0.000610839	0.000182253	5.38472e-05	0.000562887	0.000410812	0.000547412	0.000499458	0.00125437	0.000304408	0.000694131	0.000545113	0.00105013	0.00105648
971	0.000813897	0.000437234	0.000124985	0.000512108	0.000382425	0.000613973	0.000188628	5.71262e-05	0.000573829	0.000414913	0.0005512	0.000505768	0.0012559	0.000306834	0.000700092	0.000553771	0.00105869	0.00105666
972	0.00082391	0.000439288	0.000127974	0.000526015	0.000385886	0.000617023	0.0001951	6.05864e-05	0.000585081	0.00041902	0.000554966	0.000512152	0.0012574	0.000309254	0.000706435	0.000562307	0.00106699	0.00105597
973	0.000833972	0.000441309	0.000131016	0.000540144	0.000389394	0.000619989	0.000201666	6.42382e-05	0.000596613	0.000423131	0.00055871	0.000518603	0.00125891	0.00031166	0.000713118	0.000570708	0.00107496	0.0010544
974	0.000844075	0.000443296	0.000134113	0.000554477	0.00039295	0.000622872	0.000208319	6.80935e-05	0.000608391	0.000427243	0.00056243	0.000525112	0.00126044	0.000314043	0.000720104	0.000578963	0.0010825	0.00105193
975	0.000854214	0.000445249	0.000137265	0.000568992	0.000396557	0.00062567	0.000215054	7.21652e-05	0.000620375	0.000431352	0.000566124	0.000531672	0.00126202	0.000316391	0.000727368	0.000587062	0.0010895	0.00104854
976	0.000864379	0.000447168	0.00014047	0.000583668	0.000400214	0.000628385	0.000221865	7.64678e-05	0.000632525	0.000435456	0.000569792	0.000538272	0.00126369	0.00031869	0.000734893	0.000594999	0.00109584	0.00104426
977	0.000874565	0.000449052	0.00014373	0.000598482	0.000403923	0.000631016	0.000228746	8.10178e-05	0.000644797	0.00043955	0.000573433	0.000544905	0.00126546	0.000320925	0.000742675	0.000602773	0.00110138	0.0010391
978	0.000884762	0.000450903	0.000147044	0.00061341	0.000407684	0.000633566	0.00023569	8.58334e-05	0.000657145	0.000443632	0.000577044	0.000551559	0.00126736	0.000323077	0.000750723	0.000610384	0.001106	0.00103309
979	0.000894964	0.00045272	0.000150411	0.000628429	0.000411498	0.000636033	0.000242691	9.09353e-05	0.00066952	0.000447696	0.000580625	0.000558225	0.00126943	0.000325128	0.000759054	0.000617838	0.00110961	0.00102629
980	0.00090516	0.000454503	0.000153831	0.000643512	0.000415366	0.000638419	0.000249741	9.63469e-05	0.000681873	0.000451741	0.000584174	0.000564892	0.00127169	0.000327055	0.000767692	0.000625144	0.00111213	0.00101874
981	0.000915343	0.000456253	0.000157305	0.000658634	0.000419288	0.000640726	0.000256832	0.000102094	0.000694151	0.00045576	0.000587691	0.000571549	0.00127418	0.000328838	0.000776662	0.000632314	0.00111349	0.00101051
982	0.000925504	0.000457968	0.00016083	0.000673769	0.000423266	0.000642953	0.000263958	0.000108207	0.000706304	0.000459752	0.000591173	0.000578185	0.00127692	0.000330455	0.000785985	0.000639364	0.0011137	0.00100167
983	0.000935634	0.00045965	0.000164408	0.00068889	0.000427298	0.000645103	0.000271111	0.000114717	0.000718276	0.000463711	0.000594621	0.000584789	0.00127995	0.000331884	0.000795673	0.000646315	0.00111277	0.000992277
984	0.000945723	0.000461298	0.000168036	0.000703968	0.000431386	0.000647177	0.000278281	0.000121662	0.000730016	0.000467633	0.000598032	0.000591351	0.00128332	0.000333103	0.000805723	0.000653189	0.00111076	0.000982402
985	0.000955761	0.000462914	0.000171715	0.000718977	0.00043553	0.000649175	0.000285462	0.000129082	0.000741472	0.000471514	0.000601405	0.000597859	0.00128706	0.000334092	0.000816112	0.000660011	0.00110778	0.000972108
986	0.000965741	0.000464496	0.000175444	0.000733889	0.00043973	0.000651101	0.000292644	0.00013702	0.00075259	0.00047535	0.00060474	0.000604302	0.00129123	0.000334832	0.000826798	0.000666807	0.00110396	0.000961455
987	0.000975651	0.000466045	0.000179221	0.000748676	0.000443985	0.000652954	0.000299818	0.000145527	0.000763322	0.000479137	0.000608034	0.000610671	0.00129589	0.000335306	0.00083772	0.000673607	0.00109946	0.000950494
988	0.000985483	0.000467562	0.000183046	0.000763311	0.000448296	0.000654736	0.000306977	0.000154653	0.000773618	0.000482869	0.000611288	0.000616954	0.00130111	0.0003355	0.000848805	0.000680438	0.00109446	0.000939271
989	0.000995227	0.000469047	0.000186917	0.000777765	0.000452661	0.00065645	0.000314111	0.000164456	0.000783433	0.000486544	0.000614499	0.000623142	0.00130697	0.000335403	0.000859975	0.000687331	0.00108917	0.000927826
990	0.00100487	0.000470499	0.000190833	0.000792013	0.000457082	0.000658097	0.000321211	0.000174995	0.000792723	0.000490157	0.000617667	0.000629226	0.00131358	0.000335006	0.000871161	0.000694312	0.00108377	0.000916192
991	0.00101441	0.00047192	0.000194793	0.000806027	0.000461556	0.000659678	0.000328268	0.000186332	0.000801447	0.000493703	0.000620791	0.000635198	0.00132105	0.000334305	0.00088231	0.000701409	0.00107846	0.000904397
992	0.00102384	0.000473309	0.000198796	0.000819782	0.000466083	0.000661195	0.000335274	0.000198531	0.000809568	0.000497178	0.00062387	0.000641048	0.00132952	0.000333299	0.000893394	0.000708646	0.00107343	0.000892462
993	0.00103314	0.000474668	0.00020284	0.000833251	0.000470663	0.000662651	0.000342218	0.000211659	0.000817053	0.000500578	0.000626901	0.000646769	0.00133916	0.000331992	0.000904415	0.000716047	0.00106882	0.000880407
994	0.0010423	0.000475995	0.000206923	0.000846412	0.000475294	0.000664046	0.000349092	0.00022578	0.000823872	0.000503899	0.000629886	0.000652355	0.00135015	0.00033039	0.000915394	0.000723629	0.00106479	0.000868249
995	0.00105133	0.000477292	0.000211044	0.000859239	0.000479975	0.000665382	0.000355888	0.000240958	0.000829998	0.000507137	0.000632822	0.000657799	0.0013627	0.000328505	0.000926359	0.00073141	0.00106145	0.000856004
996	0.0010602	0.000478559	0.000215201	0.000871711	0.000484705	0.000666661	0.000362596	0.000257254	0.000835411	0.000510288	0.000635709	0.000663095	0.00137702	0.000326353	0.000937319	0.000739401	0.0010589	0.000843687
997	0.00106892	0.000479796	0.000219392	0.000883806	0.000489482	0.000667885	0.000369207	0.000274723	0.000840093	0.000513348	0.000638545	0.000668238	0.00139338	0.000323953	0.00094823	0.000747611	0.00105718	0.000831316
998	0.00107746	0.000481003	0.000223615	0.000895504	0.000494303	0.000669054	0.000375715	0.000293412	0.000844031	0.000516314	0.000641331	0.000673224	0.001412	0.000321327	0.000958967	0.000756045	0.00105635	0.000818908
999	0.00108584	0.000482182	0.000227868	0.000906786	0.000499169	0.000670172	0.000382109	0.000313359	0.000847214	0.000519181	0.000644064	0.000678048	0.00143315	0.000318501	0.000969295	0.000764704	0.00105642	0.000806483
1000	0.00109404	0.000483331	0.000232148	0.000917635	0.000504075	0.000671238	0.000388383	0.000334592	0.000849639	0.000521946	0.000646745	0.000682707	0.00145705	0.000315504	0.000978861	0.000773584	0.00105739	0.000794064
1001	0.00110205	0.000484452	0.000236454	0.000928035	0.00050902	0.000672255	0.000394528	0.000357123	0.000851304	0.000524607	0.000649372	0.000687198	0.00148391	0.000312368	0.000987197	0.000782679	0.00105925	0.000781674
1002	0.00110988	0.000485545	0.000240784	0.000937971	0.000514002	0.000673224	0.000400539	0.000380947	0.000852211	0.00052716	0.000651944	0.000691518	0.00151392	0.000309124	0.000993754	0.000791979	0.00106197	0.000769341
1003	0.0011175	0.000486611	0.000245134	0.000947431	0.000519018	0.000674146	0.000406408	0.000406041	0.000852365	0.000529602	0.000654462	0.000695665	0.00154719	0.000305808	0.000997961	0.000801472	0.00106554	0.000757091
1004	0.00112493	0.000487649	0.000249502	0.000956404	0.000524065	0.000675022	0.000412129	0.000432363	0.000851777	0.00053193	0.000656923	0.000699635	0.0015838	0.000302454	0.000999287	0.000811141	0.00106994	0.000744954
1005	0.00113215	0.000488659	0.000253885	0.00096488	0.000529141	0.000675854	0.000417696	0.000459848	0.000850458	0.000534142	0.000659328	0.000703428	0.00162375	0.000299097	0.000997326	0.000820969	0.00107515	0.00073296
1006	0.00113917	0.000489644	0.000258282	0.000972851	0.000534241	0.000676642	0.000423106	0.000488406	0.000848423	0.000536235	0.000661677	0.00070704	0.00166701	0.000295772	0.000991863	0.000830936	0.00108118	0.000721138
1007	0.00114597	0.000490601	0.000262688	0.000980313	0.000539364	0.000677387	0.000428352	0.000517926	0.000845689	0.000538208	0.000663967	0.000710471	0.00171342	0.000292511	0.000982927	0.000841021	0.00108806	0.000709519
1008	0.00115256	0.000491533	0.000267101	0.00098726	0.000544504	0.000678091	0.000433432	0.000548272	0.000842276	0.000540058	0.0006662	0.000713717	0.00176277	0.000289347	0.000970814	0.000851199	0.00109585	0.000698131
1009	0.00115894	0.000492439	0.000271519	0.000993691	0.00054966	0.000678754	0.000438344	0.000579284	0.000838204	0.000541784	0.000668373	0.000716776	0.00181479	0.000286308	0.000956072	0.000861449	0.00110462	0.000687002
1010	0.0011651	0.00049332	0.000275938	0.000999605	0.000554826	0.000679376	0.000443084	0.00061078	0.000833495	0.000543384	0.000670488	0.000719648	0.00186907	0.000283421	0.000939455	0.000871745	0.0011145	0.000676158
1011	0.00117105	0.000494175	0.000280355	0.001005	0.00056	0.000679959	0.000447653	0.000642559	0.000828175	0.000544857	0.000672543	0.000722329	0.00192515	0.000280709	0.000921856	0.000882063	0.00112561	0.000665623
1012	0.00117678	0.000495006	0.000284767	0.00100989	0.000565176	0.000680503	0.000452049	0.000674403	0.000822266	0.000546203	0.000674538	0.000724817	0.00198242	0.000278191	0.000904218	0.000892378	0.00113809	0.000655419
1013	0.00118229	0.000495812	0.00028917	0.00101426	0.000570352	0.000681007	0.000456274	0.000706077	0.000815796	0.000547419	0.000676472	0.000727111	0.00204019	0.000275882	0.000887449	0.000902666	0.00115208	0.000645565
1014	0.0011876	0.000496595	0.000293563	0.00101814	0.000575522	0.000681473	0.00046033	0.000737341	0.00080879	0.000548507	0.000678346	0.000729208	0.00209764	0.000273794	0.000872349	0.000912903	0.00116766	0.000636076
1015	0.00119269	0.000497353	0.00029794	0.00102152	0.000580682	0.000681901	0.000464219	0.000767944	0.000801274	0.000549465	0.000680159	0.000731107	0.00215386	0.000271933	0.000859557	0.000923064	0.00118485	0.000626968
1016	0.00119757	0.000498088	0.0003023	0.00102441	0.000585828	0.00068229	0.000467947	0.000797639	0.000793276	0.000550294	0.000681911	0.000732806	0.00220787	0.0002703	0.000849531	0.000933127	0.00120356	0.00061825
1017	0.00120224	0.0004988	0.000306639	0.00102683	0.000590955	0.000682642	0.000471517	0.000826181	0.000784823	0.000550993	0.000683601	0.000734305	0.00225862	0.000268894	0.000842542	0.000943069	0.00122357	0.00060993
1018	0.00120671	0.000499489	0.000310953	0.00102879	0.000596058	0.000682955	0.000474936	0.000853336	0.000775941	0.000551564	0.00068523	0.000735603	0.00230512	0.000267707	0.000838707	0.000952869	0.00124452	0.000602013
1019	0.00121098	0.000500156	0.000315239	0.0010303	0.000601133	0.00068323	0.000478213	0.000878887	0.000766658	0.000552006	0.000686797	0.000736699	0.00234645	0.000266727	0.000838013	0.000962505	0.0012659	0.000594501
1020	0.00121505	0.0005008	0.000319494	0.00103138	0.000606174	0.000683466	0.000481355	0.000902633	0.000757002	0.000552322	0.000688303	0.000737595	0.00238184	0.00026594	0.000840368	0.000971957	0.00128708	0.000587394
1021	0.00121893	0.000501423	0.000323715	0.00103204	0.000611177	0.000683664	0.000484372	0.000924401	0.000747	0.000552511	0.000689746	0.000738293	0.00241074	0.000265324	0.000845631	0.000981205	0.00130734	0.000580689
1022	0.00122262	0.000502024	0.000327898	0.00103229	0.000616137	0.000683823	0.000487277	0.000944048	0.00073668	0.000552576	0.000691128	0.000738794	0.00243289	0.000264858	0.00085364	0.000990231	0.00132593	0.00057438
1023	0.00122613	0.000502603	0.000332039	0.00103216	0.000621049	0.000683942	0.00049008	0.000961459	0.000726069	0.000552518	0.000692448	0.000739102	0.00244832	0.000264516	0.000864222	0.000999017	0.00134215	0.000568459
1024	0.00122946	0.000503162	0.000336137	0.00103166	0.000625907	0.000684022	0.000492795	0.000976559	0.000715197	0.000552338	0.000693706	0.000739223	0.00245735	0.000264269	0.000877188	0.00100755	0.00135542	0.000562918
1025	0.00123262	0.0005037	0.000340187	0.00103082	0.000630707	0.000684062	0.000495437	0.000989305	0.000704092	0.000552039	0.000694903	0.00073916	0.00246059	0.000264088	0.00089232	0.0010158	0.00136532	0.000557744
1026	0.00123561	0.000504218	0.000344186	0.00102964	0.000635445	0.00068406	0.000498021	0.000999694	0.000692782	0.000551622	0.000696038	0.000738922	0.00245884	0.00026394	0.00090934	0.00102376	0.00137167	0.000552925
1027	0.00123844	0.000504716	0.000348132	0.00102815	0.000640114	0.000684018	0.000500563	0.00100776	0.000681298	0.000551091	0.000697111	0.000738515	0.00245307	0.000263796	0.00092789	0.00103142	0.00137452	0.000548447
1028	0.00124112	0.000505195	0.00035202	0.00102638	0.00064471	0.000683934	0.000503081	0.00101356	0.000669669	0.000550447	0.000698124	0.000737948	0.00244426	0.000263621	0.000947508	0.00103876	0.00137414	0.000544296
1029	0.00124364	0.000505654	0.00035585	0.00102433	0.000649229	0.000683807	0.000505591	0.00101722	0.000657926	0.000549693	0.000699076	0.00073723	0.00243337	0.000263386	0.000967619	0.00104577	0.00137098	0.000540453
1030	0.00124602	0.000506095	0.000359617	0.00102203	0.000653666	0.000683638	0.000508114	0.00101884	0.0006461	0.000548832	0.000699966	0.000736373	0.00242126	0.00026306	0.000987545	0.00105243	0.00136563	0.000536904
1031	0.00124826	0.000506517	0.000363318	0.0010195	0.000658015	0.000683425	0.000510667	0.00101859	0.000634222	0.000547867	0.000700797	0.000735386	0.00240859	0.000262615	0.00100653	0.00105873	0.00135872	0.000533631
1032	0.00125037	0.000506921	0.000366952	0.00101676	0.000662273	0.000683167	0.00051327	0.00101666	0.000622324	0.000546801	0.000701567	0.000734282	0.00239585	0.000262025	0.00102379	0.00106466	0.00135089	0.000530615
1033	0.00125236	0.000507307	0.000370516	0.00101383	0.000666435	0.000682865	0.000515941	0.00101323	0.000610438	0.000545637	0.000702278	0.000733072	0.00238334	0.000261268	0.00103855	0.00107021	0.0013427	0.000527841
1034	0.00125422	0.000507677	0.000374007	0.00101072	0.000670497	0.000682517	0.000518701	0.0010085	0.000598596	0.000544378	0.00070293	0.000731769	0.00237115	0.000260324	0.00105015	0.00107537	0.00133459	0.000525289
1035	0.00125596	0.000508029	0.000377424	0.00100746	0.000674455	0.000682124	0.000521569	0.0010027	0.000586829	0.000543029	0.000703522	0.000730384	0.00235923	0.000259178	0.00105807	0.00108012	0.00132688	0.000522943
1036	0.00125759	0.000508365	0.000380764	0.00100406	0.000678305	0.000681683	0.000524563	0.000996035	0.00057517	0.000541591	0.000704056	0.000728931	0.00234745	0.000257817	0.00106199	0.00108447	0.00131977	0.000520785
1037	0.00125912	0.000508684	0.000384026	0.00100054	0.000682043	0.000681195	0.0005277	0.000988717	0.000563647	0.000540069	0.000704533	0.000727421	0.00233558	0.000256235	0.00106182	0.0010884	0.00131335	0.000518799
1038	0.00126055	0.000508989	0.000387208	0.000996909	0.000685666	0.000680659	0.000530999	0.000980947	0.000552293	0.000538467	0.000704951	0.000725866	0.00232341	0.000254428	0.00105773	0.00109191	0.00130759	0.000516967
1039	0.00126188	0.000509278	0.000390309	0.000993192	0.00068917	0.000680074	0.000534475	0.000972916	0.000541134	0.000536787	0.000705313	0.000724277	0.00231072	0.000252398	0.0010501	0.00109499	0.00130243	0.000515275
1040	0.00126313	0.000509552	0.000393327	0.0009894	0.000692553	0.000679441	0.000538144	0.0009648	0.000530198	0.000535034	0.000705618	0.000722664	0.00229733	0.00025015	0.00103949	0.00109763	0.00129778	0.000513708
1041	0.00126428	0.000509812	0.000396262	0.000985547	0.00069581	0.000678758	0.000542018	0.000956756	0.00051951	0.000533212	0.000705868	0.000721036	0.00228313	0.000247695	0.00102659	0.00109984	0.00129352	0.00051225
1042	0.00126536	0.000510058	0.000399113	0.000981645	0.000698941	0.000678025	0.000546109	0.00094892	0.000509093	0.000531324	0.000706062	0.000719404	0.00226806	0.000245046	0.00101215	0.0011016	0.00128955	0.000510888
1043	0.00126635	0.000510291	0.00040188	0.000977706	0.000701942	0.000677242	0.000550428	0.00094141	0.000498966	0.000529375	0.000706201	0.000717773	0.00225212	0.000242223	0.000996907	0.00110293	0.00128579	0.00050961
1044	0.00126727	0.00051051	0.000404561	0.000973741	0.000704811	0.000676408	0.000554982	0.00093432	0.000489148	0.000527367	0.000706287	0.000716151	0.00223534	0.000239245	0.000981522	0.00110381	0.00128215	0.000508403
1045	0.00126813	0.000510717	0.000407159	0.000969761	0.000707546	0.000675523	0.000559776	0.000927722	0.000479654	0.000525305	0.000706319	0.000714544	0.0022178	0.000236138	0.000966553	0.00110426	0.00127856	0.000507255
1046	0.00126891	0.000510912	0.000409672	0.000965773	0.000710147	0.000674586	0.000564814	0.000921668	0.000470494	0.000523192	0.000706298	0.000712956	0.00219961	0.000232929	0.00095242	0.00110426	0.00127498	0.000506156
1047	0.00126963	0.000511096	0.000412102	0.000961786	0.00071261	0.000673598	0.000570097	0.000916191	0.000461678	0.000521033	0.000706225	0.000711391	0.00218088	0.000229648	0.000939398	0.00110383	0.00127132	0.000505097
1048	0.00127028	0.000511268	0.000414451	0.000957808	0.000714936	0.000672558	0.000575622	0.000911303	0.000453209	0.000518831	0.000706101	0.000709851	0.00216173	0.000226324	0.000927625	0.00110298	0.0012675	0.000504069
1049	0.00127088	0.000511429	0.000416718	0.000953843	0.000717124	0.000671466	0.000581384	0.000907002	0.00044509	0.000516589	0.000705926	0.000708337	0.00214228	0.000222992	0.000917125	0.00110169	0.00126342	0.000503063
1050	0.00127142	0.00051158	0.000418907	0.000949899	0.000719172	0.000670323	0.000587378	0.00090327	0.000437319	0.000514313	0.000705701	0.00070685	0.00212262	0.000219684	0.000907828	0.00109999	0.00125895	0.000502072
1051	0.0012719	0.00051172	0.000421018	0.000945978	0.000721082	0.000669127	0.000593591	0.000900079	0.00042989	0.000512004	0.000705427	0.00070539	0.00210285	0.000216432	0.000899607	0.00109788	0.00125397	0.000501089
1052	0.00127233	0.000511851	0.000423056	0.000942086	0.000722852	0.00066788	0.000600012	0.000897389	0.000422796	0.000509668	0.000705105	0.000703956	0.00208305	0.000213271	0.000892302	0.00109537	0.00124832	0.00050011
1053	0.0012727	0.000511973	0.000425022	0.000938224	0.000724484	0.00066658	0.000606626	0.000895152	0.000416026	0.000507307	0.000704734	0.000702546	0.00206327	0.000210232	0.000885739	0.00109246	0.00124184	0.000499128
1054	0.00127303	0.000512086	0.00042692	0.000934395	0.000725977	0.00066523	0.000613413	0.000893319	0.000409568	0.000504925	0.000704317	0.000701158	0.00204356	0.000207346	0.000879754	0.00108918	0.00123438	0.000498139
1055	0.0012733	0.00051219	0.000428754	0.0009306	0.000727333	0.000663827	0.000620353	0.000891832	0.000403407	0.000502525	0.000703853	0.000699788	0.00202395	0.000204644	0.000874201	0.00108553	0.00122582	0.00049714
1056	0.00127352	0.000512286	0.000430527	0.000926842	0.000728553	0.000662374	0.000627425	0.000890635	0.000397527	0.000500112	0.000703344	0.000698434	0.00200448	0.000202153	0.000868959	0.00108152	0.00121605	0.000496127
1057	0.00127368	0.000512373	0.000432244	0.000923119	0.000729638	0.00066087	0.000634601	0.000889672	0.000391911	0.000497688	0.00070279	0.000697092	0.00198516	0.000199897	0.000863931	0.00107718	0.00120501	0.000495097
1058	0.0012738	0.000512454	0.000433911	0.000919432	0.000730589	0.000659316	0.000641857	0.000888888	0.000386542	0.000495256	0.000702192	0.000695759	0.00196601	0.000197902	0.000859047	0.0010725	0.00119268	0.00049405
1059	0.00127386	0.000512526	0.000435531	0.000915782	0.000731409	0.000657712	0.000649163	0.000888231	0.000381402	0.000492821	0.000701551	0.000694432	0.00194705	0.000196186	0.000854256	0.00106752	0.0011791	0.000492982
1060	0.00127387	0.000512591	0.000437112	0.000912166	0.000732099	0.000656059	0.00065649	0.000887652	0.000376476	0.000490384	0.000700868	0.000693107	0.00192829	0.000194768	0.000849528	0.00106223	0.00116436	0.000491893
[truncated: 1,940 more rows]

## Sheet: All_PDPs_>200Ma
	290618-02	300618-01	CWT-1	300618-02	300618-03	300618-04	CWT-5	CQT-2	300618-05	300618-06	300618-07	Merged	Ordovician Calapuja and San Gabon Altiplano Peru Reimann et al. (2010) and Perez and Horton (2014)	Ordovician (Sandia and Amatura) Eastern Cordillera Bolivia and Peru Reimann et al. (2010)	Devonian-Carboniferous (Cabanillas, Lampa, Ambo) Peruvian Eastern Cordillera and Altiplano (Perez and Horton, 2014; Reimann et al., 2010)	Silurian-Carboniferous Bolivian Eastern Cordillera (Leier et al., 2010)	Late Jurassic-Early Cretaceous (Huancané and Muni) Eastern Cordillera and Altiplano (Sundell et al., 2018, Perez and Horton, 2014)	Late Jurassic-Early Cretaceous (Hualhuani, Labra, Puente) Peru (Sundell et al., 2018)	Jurassic-Cretaceous (Western Cordillera, GUA08-02 and GUA08-04) Chile (Wotzlaw et al.,2011)
[truncated: 3,000 more rows]

[truncated: 8 more sheets: All_PDPs_<200Ma, All_KDEs, All_KDEs_>200Ma, All_KDEs_<200Ma, Stacked_PDPs_>200_Ma, Stacked_PDPs_<200_Ma, Stacked_KDEs_>200Ma, Stacked_KDEs_<200Ma]
